# Supplementary material
Source: PubMed Central journal article supplement (PMC7289179)
Supplement: NIHMS1547919-supplement-2.pdf [file NIHMS1547919-supplement-2.pdf]

# THE LANCET HIV

## Supplementary appendix

This appendix formed part of the original submission and has been peer reviewed.  
We post it as supplied by the authors.

Supplement to: Tan J, Altice FL, Madden LM, Zelenev A. Effect of expanding opioid agonist therapies on the HIV epidemic and mortality in Ukraine: a modelling study. *Lancet HIV* 2019; published online Dec 23. [http://dx.doi.org/10.1016/S2352-3018\(19\)30373-X](http://dx.doi.org/10.1016/S2352-3018(19)30373-X).

## Supplementary Appendix

Jiale Tan, Frederick L. Altice, Lynn Madden, Alexei Zelenev

### 1. OAT retention optimization model:

#### 1.0 OAT Dosage and retention in Care

In order to model the relationship between dosage and retention in OAT, we fit several parametric survival models, in which the duration outcome was measured as “days on OAT”.

The data from analyses was taken from the Syrex database containing individual patients’ records on the duration of OAT treatment from 2011-2016 at each of the 179 sites in the entire country. The sample size analyzed consisted of 17,602 unique individuals with more than 20,400 MMT treatment episodes. Syrex also contained information of the recorded “average” dosage of OAT every three months that was prescribed during the treatment episode. When fitting several different parametric survival models, we found that exponential distribution provided a better fit relative to the Weibull distribution, the Loglogistic and the Log-Normal Distributions based on Cox-Snell’s residuals. The average duration of OAT Treatment was found to be statistically different between dosage categories which were grouped by quantiles at 1% level. We also considered smaller grouping categories and found that the OAT hazard rates were statistically similar within the larger dosage categories.

Table S1: Association between dosage and retention in OAT: Survival Regression Analysis

| Outcome: Duration in OAT | Hazards Ratio | Std. Err. | P-values | 95% CI |      |
|--------------------------|---------------|-----------|----------|--------|------|
| <40 mg                   | Referent      |           |          |        |      |
| 40-60 mg                 | 1.31          | 0.12      | 0.00     | 1.10   | 1.57 |
| 61-99 mg                 | 0.81          | 0.06      | 0.01     | 0.70   | 0.95 |
| >=100 mg                 | 0.50          | 0.04      | 0.00     | 0.42   | 0.58 |
| _cons                    | 0.00          | 0.00      | 0.00     | 0.00   | 0.00 |

Table S2. Average Duration of Treatment and Attrition Probability by Dosage Category

| Dosage Category | N (%)        | Average Duration in Treatment Based on Survival Analysis Extended Mean (months) | Probability of Monthly Attrition Under Constant Hazard Assumption |
|-----------------|--------------|---------------------------------------------------------------------------------|-------------------------------------------------------------------|
| <40 mg          | 3382 (22.1%) | 32.2                                                                            | 0.031                                                             |
| 40-60 mg        | 4206 (27.5%) | 43.2                                                                            | 0.023                                                             |
| 61-99 mg        | 3636 (23.7%) | 53.2                                                                            | 0.019                                                             |
| ≥100 mg         | 4089 (26.7%) | 79.4                                                                            | 0.013                                                             |

### 1.1 Model description and structure

The objective of the constrained linear optimization method is to find the *maximum* number of *expected* patients that could be enrolled into OAT treatment given the current resource constraint (i.e. total procured OAT). The *expected* patients comes from two different resources: 1. enrolled patients who are willing to stay on OAT; 2. new patients. In our model's formulation, each region  $r$  is assumed to have a "chief executive" in charge of making two decisions at each time point  $t$ : whether to admit  $A_j$  patient from a set of  $J$  patients into a specific OAT program, a dose to give to the newly admitted patients ( $d_j$ ), as well as the MMT dose,  $d_i$  that each enrolled participant ( $P_i$ ) receives:

$$\max \mathbf{E}[(\sum_{i,j} \sum_{r=1}^{23} \sum_{t=1}^{365} P_{i,r,t}(d_{i,r,t}) + A_{j,r,t+1})] \quad (\text{S1})$$

Where

$$A_{j,r,t+1} = \begin{cases} 1, & \text{if patient } j \text{ is admitted to OAT in a region } r \text{ at time } t + 1 \\ 0, & \text{if patient } j \text{ is NOT admitted to OAT in a region } r \text{ at time } t + 1 \end{cases} \quad (\text{S2})$$

$$P_{i,r,t}(d_{i,r,t}) = \begin{cases} 1, & \text{enrolled patient } i \text{ stays in OAT in region } r \text{ and time } t \\ 0, & \text{enrolled patient } i \text{ is not in OAT in region } r \text{ and time } t \end{cases} \quad (\text{S3})$$

Subject to the following constraints for each patient  $i$  and oblast  $r$  at any time  $t$ :

$$\text{(i) Participation:} \quad \sum_i P(d_{i,r,t+1}) = \max(\sum_i P(d_{i,r,t}) - \sum_i P(d_{i,r,t}) \cdot f_a(Q_{i,r,t}|d_{i,r,t}), 0) \quad (\text{S4})$$

$$\text{(ii) Resource:} \quad \sum_i \sum_{t=1}^{365} (d_{i,r,t}) \leq K_r \text{ for each oblast } r \quad (\text{S5})$$

$$\text{(iii) Individual Dosage:} \quad 22 \leq d_{i,r,t} \leq 101 \quad \& \quad d_{i,r,t} \leq d_{i,r,t+1} \quad (\text{S6})$$

For the linear optimization model, we assumed a constant hazard rate for attrition when calculating the probability that the enrolled patients exit OAT ( $f_a$ ):

$$f_a(Q_{i,r,t}|d_{i,r,t}) = \begin{cases} 0.031 & d_{i,r,t} < 40 \text{ mg} \\ 0.023 & 40 \text{ mg} \leq d_{i,r,t} \leq 60 \text{ mg} \\ 0.019 & 60 \text{ mg} < d_{i,r,t} < 100 \text{ mg} \\ 0.013, & 100 \text{ mg} \leq d_{i,r,t} \end{cases} \quad (S7)$$

Table S3: Summary of Operational Efficiency among OAT programs in Regions in 2016

| Region                 | Number of Sites | Average Occupancy | Retention % | Median Time to Fill 1 slot, Days (10th, 90th pctl) | OAT Coverage % In 2016 |
|------------------------|-----------------|-------------------|-------------|----------------------------------------------------|------------------------|
| Zakarpattia            | 2               | 25                | 82.6        | 28.5 (11.0,99.0)                                   | 1.0                    |
| Zhytomyr               | 5               | 289               | 77.4        | 2.5 (1.0 ,7.0)                                     | 9.0                    |
| Chernivtsi             | 1               | 57                | 79.4        | 11.1 (1.3,35.5)                                    | 1.6                    |
| Ivano-Frankivsk        | 11              | 229               | 85.8        | 4.0 (1,10)                                         | 6.0                    |
| Ternopil               | 3               | 77                | 82.5        | 7.5 (1.0,29.2)                                     | 1.9                    |
| Rivne                  | 4               | 145               | 89.6        | 3.0 (1.0,38.5)                                     | 3.1                    |
| Vinnitsa               | 16              | 304               | 85.2        | 4.0 (1,9.6)                                        | 5.3                    |
| Volyn                  | 7               | 132               | 80.9        | 5.0 (1.0,16)                                       | 2.0                    |
| Chernihiv              | 4               | 177               | 87.1        | 4.0 (1.0,12.3)                                     | 2.6                    |
| Kyiv                   | 2               | 156               | 86.9        | 7.0 (2.5,30)                                       | 1.9                    |
| Poltava                | 12              | 585               | 82.5        | 2.2 (0.6,6.5)                                      | 7.1                    |
| Khmelnyskyi            | 10              | 312               | 77.1        | 3.0 (1.0,9.9)                                      | 3.6                    |
| Kirovohrad             | 4               | 273               | 88.7        | 3.5 (1,13.8)                                       | 3.1                    |
| Kherson                | 6               | 215               | 81.7        | 5.0 (1.2,13.4)                                     | 2.2                    |
| Lviv                   | 6               | 241               | 83.4        | 5.0 (2.0,14.8)                                     | 2.2                    |
| Cherkasy               | 8               | 165               | 79.3        | 7.0 (1.0,18.4)                                     | 1.4                    |
| Mykolaiv               | 13              | 664               | 78.3        | 1.1 (0.5,6.0)                                      | 5.8                    |
| Zaporizhia             | 5               | 274               | 86.2        | 5.0 (1.0,15.6)                                     | 2.4                    |
| Sumy                   | 8               | 330               | 83.6        | 2 (1.0, 7.0)                                       | 2.7                    |
| Kharkiv                | 10              | 292               | 86.8        | 3.0 (1.0,12.8)                                     | 1.9                    |
| Kyiv (city)            | 6               | 657               | 83.8        | 1.0 (0.3, 3.5)                                     | 1.9                    |
| Odesa                  | 4               | 272               | 89.2        | 3.0 (1, 11.6)                                      | 0.7                    |
| Dnipro                 | 24              | 1391              | 76.3        | 1.0 (0.3, 4.0)                                     | 3.4                    |
| <b>Ukraine (Total)</b> | <b>171</b>      | <b>7,262</b>      | <b>83.2</b> | <b>0.3 (0.1, 0.81)</b>                             | <b>2.7</b>             |

## 2. HIV transmission compartment model:

### 2.1 Model description

We developed a dynamic, deterministic compartmental model of HIV transmission in Ukraine's population. Figure S1 contains the schematic for the HIV transmission model. In the compartmental model we stratified the population into three mutually exclusive groups: heterosexual men (HM), heterosexual women (HW) and men who have sex with men (MSM). The individuals in the three groups enter PWID population through initiation of injection and exit through cessation or death. Entry into OAT among PWID was associated with reduced number of injections as well as reduced risk of mortality (Table S1), while exit from OAT was associated with higher frequency of injection behavior and greater mortality risk. The rates of HIV transmission varied across different population compartments, as susceptible individuals (S) could become infected with the HIV virus through sexual contact, as well as sharing of paraphernalia with HIV positive individuals. In the model we assumed proportional mixing of the populations.

### 2.2 Model parameterization

#### **Main Data Sources:**

Statistics on the population size, population growth and mortality were taken from the Ukrainian Census, which compiled the data for each region. Data on the size of PWID, as well as HIV prevalence was taken from data from reports published by the Alliance for Public Health in Ukraine, that conducts an Integrated Bio-behavioral Survey (IBBS), which is conducted every other year.

#### **ExMAT Data**

From January 2014 to March 2015, self-administered surveys with linked HIV and HCV testing was conducted in five large cities: Kyiv (Kiev), Odesa (Odessa), Mykolaiv (Nikolaev), Dnipro (Dnipropetrovsk), and Lviv (Lvov). Recruitment occurred sequentially (approximately 60–90 days per city) between 2014 and 2015. The sample was stratified by three groups of PWID: 1) currently on OAT; 2) previously on OAT; and 3) never on OAT. The overall objective of the study was to understand drug use behavior, health outcomes, risk factors, and barriers and facilitators of accessing OAT treatment among PWID in Ukraine. The eligibility criteria required that the study participants be 18 or older, and meet ICD-10 criteria for opioid dependence, and either reside or work in the city, where sampling took place. Study participants who were currently or previously on OAT were randomly selected from client lists obtained from OAT sites in each city and invited by outreach workers to participate in the study. Respondent Driven Sampling (RDS) was used primarily to recruit clients who had never been on OAT, but also included individuals who has OAT experience.<sup>1-5</sup> The study was approved at Institutional Review boards at Yale University and the Gromashevskiy Institute at the National Academy of Medical Sciences.

#### **SyrEX Database**

SyrEx is a database management system developed and maintained by the Alliance for Public Health in Ukraine. The database contains information on treatment episodes, as well as average dosing, for patients participating in OAT from 2009-2016 in 28 regions in Ukraine. The total sample size consists of more than 20,000 patient records, which have been de-identified. The data set was used for analyzing the association between retention in OAT and dosing, as well as in the calculation of mortality rates among HIV+ and HIV- PWID on OAT, and the rates of viral suppression. In several instances, we used multiple imputations to estimate mortality rates among HIV+ PWID on OAT in Zakarpattia, Sumy and Ternopil regions, and the mortality rates among HIV- PWID on OAT in Zakarpattia and Chernigiv due to lack of data stemming from small sample sizes<sup>6</sup>.

Figure S1: HIV transmission compartment model schematics

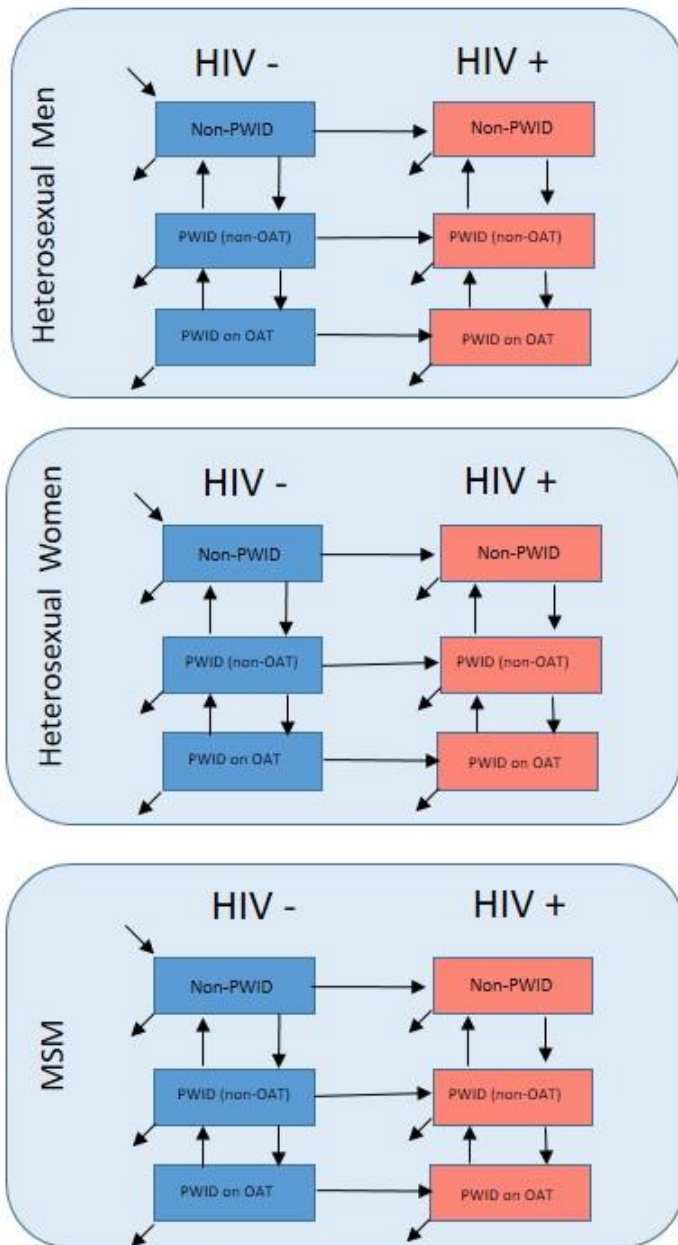

**Table S4: HIV transmission compartment model parameters**

| Parameters     | Definition                                                                     | Median Value<br>(Regional Range) | Distribution            | Source                                                 |
|----------------|--------------------------------------------------------------------------------|----------------------------------|-------------------------|--------------------------------------------------------|
| $d_1$          | Mortality rate per year among non-PWID, HIV-                                   | 0.011<br>(0.009,0.012)           | LogNormal               | Ukrainian Census <sup>7</sup>                          |
| $d_2$          | Mortality rate per year among non-PWID, HIV+                                   | 0.021<br>(0.008 — 0.037)         | LogNormal               | Ukrainian Center for Public Health <sup>8</sup>        |
| $d_3$          | Mortality rate per year among non-OAT PWID, HIV -                              | 0.061<br>(0.012-0.18)            | Calculated              | Calculation Based on Sordo et al <sup>9</sup>          |
| $d_4$          | Mortality rate per year among non-OAT PWID, HIV+                               | 0.14<br>(0.04-0.26)              | Calculated              | Calculation Based on Sordo et al <sup>9</sup>          |
| $d_5$          | Mortality rate per year among OAT PWID, HIV -                                  | 0.019<br>(0.0036-0.057)          | LogNormal               | Syrex database (Description in the Appendix)           |
| $d_6$          | Mortality rate per year among OAT PWID, HIV+                                   | 0.05<br>(0.0137-0.083)           | LogNormal               | Syrex database                                         |
| $mrr_{oat}$    | Mortality Risk Ratio: PWID on OAT vs Non-OAT                                   | 3.2<br>(2.6-3.86)                | Uniform                 | 9                                                      |
| $u_1$          | Rate of Entry into drug injection group among HIV-                             | 0.00062<br>(0.0005-0.00073)      | -                       | Calibrated to fit the model                            |
| $u_3$          | Entry rate into drug injection among HIV+                                      | 0.0005<br>(0.000376-0.0006)      | -                       | Calibrated to fit the model                            |
| $u_2$          | OAT Entry rate among HIV- PWID                                                 | 0.00987<br>(0.0001-0.044)        | -                       | Calibrated to fit the model                            |
| $u_4$          | OAT entry among HIV+ PWID                                                      | 0.0055<br>(0.00001-0.018)        | -                       | Calibrated to fit the model                            |
| $\alpha$       | Average number of sexual act frequency per month                               | 6.27**<br>(1-11.2)               | Poisson                 | 10                                                     |
| $f$            | Probability of unprotected sex (per sexual act)                                | 0.47<br>(0.39-0.59)              | Varied to fit the model | Calibrated to fit the model                            |
| $\beta_1$      | Average number of injections per day among PWID not on OAT                     | 0.90<br>(0.3 — 1.31)             | Varied to fit the model | Calibrated to fit the model                            |
| $\beta_2$      | Average number of injections per day among PWID on OAT                         | 0.12<br>(0.095 — 0.14)           | Beta                    | ExMAT data <sup>11</sup> (Description in the Appendix) |
| $f_1$          | Probability of sharing needles among PWID not on OAT                           | 0.16<br>(0.04 — 0.28)            | -                       | Varied to fit the model                                |
| $f_2$          | Probability of sharing needles among PWID on OAT                               | 0.009<br>(0.0006-0.02)           | Beta                    | ExMAT data <sup>11</sup> (Description in the Appendix) |
| $\sigma_{MSM}$ | Probability of HIV infection per unprotected anal sex act among MSM            | 0.016<br>(0.0029-0.0402)         | None                    | Calibrated to fit the model                            |
| $\sigma_w$     | Probability of HIV infection per unprotected receptive vaginal sexual act      | 0.0027<br>(0.0003-0.0049)        | None                    | Calibrated to fit the model                            |
| $\sigma_M$     | Probability of HIV Infection per unprotected insertive vaginal sexual act      | 0.0028<br>(0.0001-0.0050)        | None                    | Calibrated to fit the model                            |
| $\sigma_I$     | Probability of HIV infection per injection among PWID                          | 0.0037<br>( 0.0013-0.0075)       | None                    | Calibrated to fit the model                            |
| $\delta$       | Entry Rate into Susceptible                                                    | 0.01                             | -                       | Calibrated to fit the model                            |
| $v_{oat}$      | Probability of Viral Suppression among HIV+ PWID on OAT                        | 0.446<br>(0.108—0.99)            | LogNormal               | SyReX (Description in the Appendix)                    |
| $v_{Non-oat}$  | Proportion of HIV+ PWID who attain viral suppression among non-OAT PWID on ART | 0.668<br>(0.4875- 0.7707)        | LogNormal               | Ukraine's Ministry of Health <sup>12</sup>             |
| $R_{ART}$      | Proportion of PWID receiving ART among Non-OAT, HIV+ PWID                      | 0.562<br>(0.4794, 0.7261)        | LogNormal               | Ukraine's Ministry of Health <sup>12</sup>             |
| $T_{HIV}$      | Proportion of HIV+ that are aware of infection status                          | 0.56                             | None                    | UNAIDS <sup>13</sup>                                   |

Note: MSM- Men who have sex with men, PWID –people who inject drugs, OAT - opioid agonist therapies, ART – antiretroviral therapy  
 \*\*Converted to a Number of times per day in the model

## 2.3 Model Equations

The total size of susceptible (S) and infected (I) compartments in each population group can be expressed as a sum of non-PWID, PWID on OAT, and PWID not on OAT:

$$S_{MSM} = S_{MSM,nonPWID} + S_{MSM,PWID,nonOAT} + S_{MSM,PWID,OAT} \quad (S8)$$

$$I_{MSM} = I_{MSM,nonPWID} + I_{MSM,PWID,nonOAT} + I_{MSM,PWID,OAT} \quad (S9)$$

$$I_{MSM,nonOAT} = I_{MSM,nonPWID} + I_{MSM,PWID,nonOAT} \quad (S10)$$

$$S_{HM} = S_{HM,nonPWID} + S_{HM,PWID,nonOAT} + S_{HM,PWID,OAT} \quad (S11)$$

$$I_{HM} = I_{HM,nonPWID} + I_{HM,PWID,nonOAT} + I_{HM,PWID,OAT} \quad (S12)$$

$$I_{HM,nonOAT} = I_{HM,nonPWID} + I_{HM,PWID,nonOAT} \quad (S13)$$

$$S_{HW} = S_{HW,nonPWID} + S_{HW,PWID,nonOAT} + S_{HW,PWID,OAT} \quad (S14)$$

$$I_{HW} = I_{HW,nonPWID} + I_{HW,PWID,nonOAT} + I_{HW,PWID,OAT} \quad (S15)$$

$$I_{HW,nonOAT} = I_{HW,nonPWID} + I_{HW,PWID,nonOAT} \quad (S16)$$

$$S_{PWID} = S_{MSM,PWID,nonOAT} + S_{MSM,PWID,OAT} + S_{HM,PWID,nonOAT} + S_{HM,PWID,OAT} + S_{HW,PWID,nonOAT} + S_{HW,PWID,OAT} \quad (S17)$$

$$I_{PWID} = I_{MSM,PWID,nonOAT} + I_{MSM,PWID,OAT} + I_{HM,PWID,nonOAT} + I_{HM,PWID,OAT} + I_{HW,PWID,nonOAT} + I_{HW,PWID,OAT} \quad (S18)$$

$$I_{PWID,nonOAT} = I_{MSM,PWID,nonOAT} + I_{HM,PWID,nonOAT} + I_{HW,PWID,nonOAT} \quad (S19)$$

$$I_{PWID,OAT} = I_{MSM,PWID,OAT} + I_{HM,PWID,OAT} + I_{HW,PWID,OAT} \quad (S20)$$

### Equations modeling transmission:

$$t_{MSM,nonPWID} = 1 - ((1 - f) + f \cdot \frac{S_{MSM} + I_{MSM,nonOAT} \cdot T_{HIV} \cdot R_{ART} \cdot v_{non-oat} + I_{MSM,PWID,OAT} \cdot v_{oat}}{S_{MSM} + I_{MSM}} + f \cdot \frac{I_{MSM} - I_{MSM,nonOAT} \cdot T_{HIV} \cdot R_{ART} \cdot v_{non-oat} - I_{MSM,PWID,OAT} \cdot v_{oat}}{S_{MSM} + I_{MSM}} \cdot (1 - \sigma_{MSM}))^{365\alpha} \quad (S21)$$



$$\begin{aligned}
t_{\text{MSM,PWID,NONOAT}} &= 1 - ((1 - f_1) + f_1 \cdot \frac{S_{\text{PWID}} + I_{\text{PWID,OAT}} \cdot v_{\text{oat}} + I_{\text{PWID,NONOAT}} \cdot T_{\text{HIV}} \cdot R_{\text{ART}} \cdot v_{\text{non-oat}}}{S_{\text{PWID}} + I_{\text{PWID}}}) + f_1 \\
&\cdot \frac{I_{\text{PWID}} - I_{\text{PWID,OAT}} \cdot v_{\text{oat}} - I_{\text{PWID,NONOAT}} \cdot T_{\text{HIV}} \cdot R_{\text{ART}} \cdot v_{\text{Non-oat}}}{S_{\text{PWID}} + I_{\text{PWID}}} \cdot (1 - \sigma_I)^{365\beta_1} + t_{\text{MSM,NONPWID}}
\end{aligned} \tag{S22}$$

$$\begin{aligned}
t_{\text{MSM,PWID,OAT}} &= 1 - ((1 - f_2) + f_2 \cdot \frac{S_{\text{PWID}} + I_{\text{PWID,OAT}} \cdot v_{\text{oat}} + I_{\text{PWID,NONOAT}} \cdot T_{\text{HIV}} \cdot R_{\text{ART}} \cdot v_{\text{Non-oat}}}{S_{\text{PWID}} + I_{\text{PWID}}}) + f_2 \\
&\cdot \frac{I_{\text{PWID}} - I_{\text{PWID,OAT}} \cdot v_{\text{oat}} - I_{\text{PWID,NONOAT}} \cdot T_{\text{HIV}} \cdot R_{\text{ART}} \cdot v_{\text{Non-oat}}}{S_{\text{PWID}} + I_{\text{PWID}}} \cdot (1 - \sigma_I)^{365\beta_2} + t_{\text{MSM,NONPWID}}
\end{aligned} \tag{S23}$$

$$\begin{aligned}
t_{\text{HM,NONPWID}} &= 1 - ((1 - f) + f \cdot \frac{S_{\text{HW}} + I_{\text{HW,NONOAT}} \cdot T_{\text{HIV}} \cdot R_{\text{ART}} \cdot v_{\text{Non-oat}} + I_{\text{HW,PWID,OAT}} \cdot v_{\text{oat}}}{S_{\text{HW}} + I_{\text{HW}}}) + f \\
&\cdot \frac{I_{\text{HW}} - I_{\text{HW,NONOAT}} \cdot T_{\text{HIV}} \cdot R_{\text{ART}} \cdot v_{\text{Non-oat}} - I_{\text{HW,PWID,OAT}} \cdot v_{\text{oat}}}{S_{\text{HW}} + I_{\text{HW}}} \cdot (1 - \sigma_M)^{365\alpha}
\end{aligned} \tag{S24}$$

$$\begin{aligned}
t_{\text{HM,PWID,NONOAT}} &= 1 - ((1 - f_1) + f_1 \cdot \frac{S_{\text{PWID}} + I_{\text{PWID,OAT}} \cdot v_{\text{oat}} + I_{\text{PWID,NONOAT}} \cdot T_{\text{HIV}} \cdot R_{\text{ART}} \cdot v_{\text{Non-oat}}}{S_{\text{PWID}} + I_{\text{PWID}}}) + f_1 \\
&\cdot \frac{I_{\text{PWID}} - I_{\text{PWID,OAT}} \cdot r_{\text{ARTS}} - I_{\text{PWID,NONOAT}} \cdot T_{\text{HIV}} \cdot R_{\text{ART}} \cdot v_{\text{Non-oat}}}{S_{\text{PWID}} + I_{\text{PWID}}} \cdot (1 - \sigma_I)^{365\beta_1} + t_{\text{HM,NONPWID}}
\end{aligned} \tag{S25}$$

$$\begin{aligned}
t_{\text{HM,PWID,OAT}} &= 1 - ((1 - f_2) + f_2 \cdot \frac{S_{\text{PWID}} + I_{\text{PWID,OAT}} \cdot v_{\text{oat}} + I_{\text{PWID,NONOAT}} \cdot T_{\text{HIV}} \cdot R_{\text{ART}} \cdot r_{\text{ARTSNON}}}{S_{\text{PWID}} + I_{\text{PWID}}}) + f_2 \\
&\cdot \frac{I_{\text{PWID}} - I_{\text{PWID,OAT}} \cdot r_{\text{ARTS}} - I_{\text{PWID,NONOAT}} \cdot T_{\text{HIV}} \cdot R_{\text{ART}} \cdot v_{\text{Non-oat}}}{S_{\text{PWID}} + I_{\text{PWID}}} \cdot (1 - \sigma_I)^{365\beta_2} + t_{\text{HM,NONPWID}}
\end{aligned} \tag{S26}$$

$$\begin{aligned}
t_{\text{HW,NONPWID}} &= 1 - ((1 - f) + f \cdot \frac{S_{\text{HM}} + I_{\text{HM,NONOAT}} \cdot T_{\text{HIV}} \cdot R_{\text{ART}} \cdot v_{\text{Non-oat}} + I_{\text{HM,PWID,OAT}} \cdot v_{\text{oat}}}{S_{\text{HM}} + I_{\text{HM}}}) + f \\
&\cdot \frac{I_{\text{HM}} - I_{\text{HM,NONOAT}} \cdot T_{\text{HIV}} \cdot R_{\text{ART}} \cdot v_{\text{Non-oat}} - I_{\text{HM,PWID,OAT}} \cdot v_{\text{oat}}}{S_{\text{HM}} + I_{\text{HM}}} \cdot (1 - \sigma_W)^{365\alpha}
\end{aligned} \tag{S27}$$

$$\begin{aligned}
t_{\text{HW,PWID,NONOAT}} &= 1 - ((1 - f_1) + f_1 \cdot \frac{S_{\text{PWID}} + I_{\text{PWID,OAT}} \cdot v_{\text{oat}} + I_{\text{PWID,NONOAT}} \cdot T_{\text{HIV}} \cdot R_{\text{ART}} \cdot v_{\text{Non-oat}}}{S_{\text{PWID}} + I_{\text{PWID}}}) + f_1 \\
&\cdot \frac{I_{\text{PWID}} - I_{\text{PWID,OAT}} \cdot v_{\text{oat}} - I_{\text{PWID,NONOAT}} \cdot T_{\text{HIV}} \cdot R_{\text{ART}} \cdot v_{\text{Non-oat}}}{S_{\text{PWID}} + I_{\text{PWID}}} \cdot (1 - \sigma_I)^{365\beta_1} + t_{\text{HW,NONPWID}}
\end{aligned} \tag{S28}$$

$$t_{HW,PWID,OAT} = 1 - ((1 - f_2) + f_2 \cdot \frac{S_{PWID} + I_{PWID,OAT} \cdot v_{oat} + I_{PWID,NONOAT} \cdot T_{HIV} \cdot R_{ART} \cdot v_{Non-oat}}{S_{PWID} + I_{PWID}} + f_2 \cdot \frac{I_{PWID} - I_{PWID,OAT} \cdot v_{oat} - I_{PWID,NONOAT} \cdot T_{HIV} \cdot R_{ART} \cdot v_{Non-oat}}{S_{PWID} + I_{PWID}} \cdot (1 - \sigma_I))^{365\beta_2} + t_{HW,NONPWID} \quad (S29)$$

**Transition equations:**

$$\frac{dS_{MSM,NONPWID}}{dt} = \delta P_1 - S_{MSM,NONPWID}(d_1 + t_{MSM,NONPWID} + u_1) \quad (S30)$$

$$\frac{dS_{MSM,PWID,NONOAT}}{dt} = S_{MSM,NONPWID} \cdot u_1 - (d_3 + t_{MSM,PWID,NONOAT} + u_2) \cdot S_{MSM,PWID,NONOAT} \quad (S31)$$

$$\frac{dS_{MSM,PWID,OAT}}{dt} = S_{MSM,PWID,NONOAT}u_2 - S_{MSM,PWID,OAT}(d_5 + t_{MSM,PWID,OAT}) \quad (S32)$$

$$\frac{dI_{MSM,NONPWID}}{dt} = S_{MSM,NONPWID}t_{MSM,NONPWID} - I_{MSM,NONPWID} \cdot (d_2 + u_3) \quad (S33)$$

$$\frac{dI_{MSM,PWID,NONOAT}}{dt} = I_{MSM,NONPWID}u_3 + S_{MSM,PWID,NONOAT}t_{MSM,PWID,NONOAT} - I_{MSM,PWID,NONOAT}(d_4 + u_4) \quad (S34)$$

$$\frac{dI_{MSM,PWID,OAT}}{dt} = S_{MSM,PWID,OAT}t_{MSM,PWID,OAT} + I_{MSM,PWID,NONOAT}(u_4 - d_6) \quad (S35)$$

$$\frac{dS_{HM,NONPWID}}{dt} = \delta P_2 - S_{HM,NONPWID}(d_1 + t_{HM,NONPWID} + u_1) \quad (S36)$$

$$\frac{dS_{HM,PWID,NONOAT}}{dt} = S_{HM,NONPWID}u_1 - S_{HM,PWID,NONOAT} \cdot (d_3 + t_{HM,PWID,NONOAT} + u_2) \quad (S37)$$

$$\frac{dS_{HM,PWID,OAT}}{dt} = S_{HM,PWID,OAT}(u_2 - d_5 - t_{HM,PWID,OAT}) \quad (S38)$$

$$\frac{dI_{HM,NONPWID}}{dt} = S_{HM,NONPWID}t_{HM,NONPWID} - I_{HM,NONPWID}(d_2 + u_3) \quad (S39)$$

$$\frac{dI_{HM,PWID,NONOAT}}{dt} = I_{HM,NONPWID}u_3 + S_{HM,PWID,NONOAT}t_{HM,PWID,NONOAT} - I_{HM,PWID,NONOAT}(d_4 + u_4) \quad (S40)$$

$$\frac{dI_{HM,PWID,OAT}}{dt} = S_{HM,PWID,OAT}t_{HM,PWID,OAT} + I_{HM,PWID,NONOAT}u_4 - I_{HM,PWID,OAT}d_6 \quad (S41)$$

$$\frac{dS_{HW,NONPWID}}{dt} = \delta P_3 - S_{HW,NONPWID}(d_1 + t_{HW,NONPWID} + u_1) \quad (S42)$$

$$\frac{dS_{HW,PWID,NONOAT}}{dt} = S_{HW,NONPWID}u_1 - S_{HW,PWID,NONOAT} \cdot (d_3 + t_{HW,PWID,NONOAT} + u_2) \quad (S43)$$

$$\frac{dS_{HW,PWID,OAT}}{dt} = u_2 S_{HW,PWID,NONOAT} - S_{HW,PWID,OAT}(d_5 + t_{HW,PWID,OAT}) \quad (S44)$$

$$\frac{dI_{HW,NONPWID}}{dt} = S_{HW,NONPWID}t_{HW,NONPWID} - I_{HW,NONPWID}(d_2 + u_3) \quad (S45)$$

$$\frac{dI_{HW,PWID,NONOAT}}{dt} = I_{HW,NONPWID}u_3 + S_{HW,PWID,NONOAT}t_{HW,PWID,NONOAT} - I_{HW,PWID,NONOAT}(d_4 + u_4) \quad (S46)$$

$$\frac{dI_{HW,PWID,OAT}}{dt} = S_{HW,PWID,OAT}t_{HW,PWID,OAT} + I_{HW,PWID,NONOAT}u_4 - d_6 I_{HW,PWID,OAT} \quad (S47)$$

To calculate the mortality rates among HIV+ and HIV- PWID, who are not on OAT we used the following specification:  $d_3=d_5 \cdot mrr_{oat}$  and  $d_4=d_6 \cdot mrr_{oat}$  due to a lack of actual mortality data among PWID.

## 2.5 Model Calibration

The data on the total population size in each region is taken from the Census published by the State Statistics Services in Ukraine, while the estimates for the size of at risk population, i.e. PWID and MSM, are taken from analytical reports published by AIDS Alliance for Public Health.<sup>14,15</sup> The estimates of at-risk populations, however, have a wide confidence intervals due to a high degree of uncertainty. In order to calibrate the modeling parameters that would account for uncertainty in the size of at-risk-populations, we develop a novel “Minimum Step Deviation” algorithm.

### Steps of MSD Algorithm:

1. Application of the method of the least squares (OLS) to calibrate parameters using total numbers of people living with HIV. The new set of calibrated parameters set  $\Theta^*$  is saved for step 6.
2. Application of OLS to calibrate parameters using the number of HIV+ MSM in each region in order to calculate calibrated parameter set  $\chi^*$ .
3. Application of OLS to calibrate parameter using number of PWID living with HIV in order to calculate calibrated parameter set  $\kappa^*$ .
4. Estimation of the model using parameter set  $\chi^*$  to get number of HIV+ MSM, as well as 90% Confidence interval. The resulting confidence bounds are compared to 90% CI based on the empirical distribution of HIV+ MSM and used to estimate the derive the final CI of HIV+ MSM, denoted as  $CI_{MSMHIV}$ .
5. Estimation of the model using parameter set  $\kappa^*$ . Calculation of the number of PWID who are HIV+, as well as 90% CI (denoted as  $CI_{PWIDHIV}$ ) based on the model's output as well as the data.
6. Estimation of the model using parameters set  $\Theta^*$  (from step 1), The algorithm progresses to the next step if the number of HIV+ MSM from model is within  $CI_{MSMHIV}$ . If the condition is not satisfied, a minimum step  $w_1^*$  is computed from  $\Omega 1^* = (1 - w_1^*)\Theta^* + w_1^* \chi^*$ , such that the number of HIV+ MSM is within confidence bounds  $CI_{MSMHIV}$ .
7. Estimation of the model using parameters set  $\Omega 1^*$ . The algorithm terminates with  $\Omega 1^*$  being the final calibrated parameter set if the estimated number of HIV+ PWID from the model is within confidence interval  $CI_{PWIDHIV}$ . If the condition is not satisfied the minimum step  $w_2^*$  is calculated iteratively  $\Omega 2^* = (1 - w_2^*)\Omega 1^* + w_2^* \kappa^*$  until the number of HIV+ PWID is within the confidence bounds  $CI_{PWIDHIV}$  and  $\Omega 2^*$  is the final calibrated parameters set.

In addition, we conservatively assumed that the frequency of injection per day, as well as probability of sharing paraphernalia, was higher among non-OAT relative to PWID on OAT. We also assumed that the probability of HIV transmission following unprotected sex behavior among MSM<sup>7</sup> is larger than the probability of HIV Transmission given unprotected sex behavior among non-MSM.

### Calibration mathematical expression:

In order to make model easy to read, we denote:

$$\tilde{Y}_{HIV-}(t, \Theta): \text{Value } \tilde{Y}_{HIV-} \text{ at time } t, \text{ under } \Theta \text{ parameters set} \quad (\text{S48})$$

$$\begin{aligned} \tilde{Y}_{HIV-}(t, \Theta) = & S_{MSM, NONPWID}(t, \Theta) + S_{MSM, PWID, NONOAT}(t, \Theta) + S_{MSM, PWID, OAT}(t, \Theta) \\ & + S_{HM, NONPWID}(t, \Theta) + S_{HM, PWID, NONOAT}(t, \Theta) + S_{HM, PWID, OAT}(t, \Theta) \\ & + S_{HW, NONPWID}(t, \Theta) + S_{HW, PWID, NONOAT}(t, \Theta) + S_{HW, PWID, OAT}(t, \Theta) \end{aligned} \quad (\text{S49})$$

$$\begin{aligned} \tilde{Y}_{HIV+}(t, \Theta) = & I_{MSM, NONPWID}(t, \Theta) + I_{MSM, PWID, NONOAT}(t, \Theta) + I_{MSM, PWID, OAT}(t, \Theta) \\ & + I_{HM, NONPWID}(t, \Theta) + I_{HM, PWID, NONOAT}(t, \Theta) + I_{HM, PWID, OAT}(t, \Theta) \\ & + I_{HW, NONPWID}(t, \Theta) + I_{HW, PWID, NONOAT}(t, \Theta) + I_{HW, PWID, OAT}(t, \Theta) \end{aligned} \quad (\text{S50})$$

$$\tilde{Y}_{MSMHIV+}(t, \chi) = I_{MSM, NONPWID}(t, \chi) + I_{MSM, PWID, NONOAT}(t, \chi) + I_{MSM, PWID, OAT}(t, \chi) \quad (\text{S51})$$

$$\begin{aligned} \tilde{Y}_{PWIDHIV+}(t, \kappa) = & I_{MSM, PWID, OAT}(t, \kappa) + I_{MSM, PWID, NONOAT}(t, \kappa) + I_{HM, PWID, OAT}(t, \kappa) + \\ & I_{HM, PWID, NONOAT}(t, \kappa) + I_{HW, PWID, OAT}(t, \kappa) + I_{HW, PWID, NONOAT}(t, \kappa) \end{aligned} \quad (\text{S52})$$

$$\tilde{Y}_{Total}(t, \chi^*) = \tilde{Y}_{HIV+}(t, \chi^*) + \tilde{Y}_{HIV-}(t, \chi^*) \quad (\text{S53})$$

$$\tilde{Y}_{Total}(t, \kappa^*) = \tilde{Y}_{HIV+}(t, \kappa^*) + \tilde{Y}_{HIV-}(t, \kappa^*) \quad (\text{S54})$$

$$\tilde{\theta}_{MSMHIV+}(t, \chi^*) = \frac{\tilde{Y}_{MSMHIV+}(t, \chi^*)}{\tilde{Y}_{Total}(t, \chi^*)} \quad (\text{S55})$$

$$\theta_{MSMHIV+}(t) = \frac{Y_{MSMHIV+}(t)}{Y_{Total}(t)} \quad (\text{S56})$$

$$\tilde{\theta}_{PWIDHIV+}(t, \kappa^*) = \frac{\tilde{Y}_{PWIDHIV+}(t, \kappa^*)}{\tilde{Y}_{Total}(t, \kappa^*)} \quad (\text{S57})$$

$$\theta_{PWIDHIV+}(t) = \frac{Y_{PWIDHIV+}(t)}{Y_{Total}(t)} \quad (\text{S58})$$

$Y_{HIV+}(t)$  is size of total population living with HIV at time  $t$  based on empirical data.

$Y_{MSMHIV+}(t)$  is size of MSM population living with HIV at time  $t$  based on empirical data.

$Y_{PWIDHIV+}(t)$  is size of PWID population living with HIV at time  $t$  based on empirical data.

$Y_{Total}(t)$  is size of the population at time  $t$  based on empirical data.

$\widehat{iduin}(t)$  is the HIV incidence among PWID at time  $t$  from the model.

$\widehat{in}(t)$  is the HIV incidence in the total population at time  $t$  from the model.

$iduin(t)$  is the HIV incidence among PWID at time  $t$ .

$in(t)$  is the HIV incidence in the population at time  $t$ .

$$\min f(\Theta) \tag{S59}$$

Such that:

$$f(\Theta) = \sum_t (Y_{HIV+}(t) - \tilde{Y}_{HIV+}(t, \Theta))^2; \tag{S60}$$

$$\beta_2 \leq \beta_1; f_2 \leq f_1; \tag{S61}$$

$$\sigma_M \leq \sigma_F \leq \sigma_{MSM}; \{d_1, d_2, d_3, d_4, d_5, d_6\} \in [0,1]; \{f, f_1, f_2\} \in [0,1]; \tag{S62}$$

$$\{f, f_1, f_2\} \in [0,1]; \{\alpha, \beta_1, \beta_2\} \in [0, +\infty]; \{u_1, u_2, u_3, u_4\} \in [-1,1]; \{\sigma_{MSM}, \sigma_M, \sigma_F, \sigma_I\} \in [0,1]; \tag{S63}$$

$$d_1 \leq d_2; d_3 \leq d_4; d_5 \leq d_6; d_1 \leq d_3; d_2 \leq d_4; d_5 \leq d_3; d_6 \leq d_4; \tag{S64}$$

$$\Theta = \{d_1, d_2, d_3, d_4, d_5, d_6, u_1, u_2, u_3, u_4, \alpha, f, \beta_1, \beta_2, f_1, f_2, \sigma_{MSM}, \sigma_M, \sigma_F, \sigma_I\}; \tag{S65}$$

$$\min g(\chi) \tag{S66}$$

Such that

$$g(\chi) = \sum_t (Y_{MSMHIV+}(t) - \tilde{Y}_{MSMHIV+}(t, \chi))^2 \tag{S67}$$

$$\beta_2 \leq \beta_1; f_2 \leq f_1; \tag{S68}$$

$$\sigma_M \leq \sigma_F \leq \sigma_{MSM}; \{d_1, d_2, d_3, d_4, d_5, d_6\} \in [0,1]; \{f, f_1, f_2\} \in [0,1]; \tag{S69}$$

$$\{f, f_1, f_2\} \in [0,1]; \{\alpha, \beta_1, \beta_2\} \in [0, +\infty]; \{u_1, u_2, u_3, u_4\} \in [-1,1]; \{\sigma_{MSM}, \sigma_M, \sigma_F, \sigma_I\} \in [0,1]; \tag{S70}$$

$$d_1 \leq d_2; d_3 \leq d_4; d_5 \leq d_6; d_1 \leq d_3; d_2 \leq d_4; d_5 \leq d_3; d_6 \leq d_4; \tag{S71}$$

$$\chi = \{d_1, d_2, d_3, d_4, d_5, d_6, u_1, u_2, u_3, u_4, \alpha, f, \beta_1, \beta_2, f_1, f_2, \sigma_{MSM}, \sigma_M, \sigma_F, \sigma_I\}; \tag{S72}$$

$$\min h(\kappa) \tag{S73}$$

Such that

$$h(\kappa) = \sum_t (Y_{PWIDHIV+}(t) - \tilde{Y}_{PWIDHIV+}(t, \kappa))^2 \quad (S74)$$

$$\beta_2 \leq \beta_1 ; f_2 \leq f_1 ; \quad (S75)$$

$$\sigma_M \leq \sigma_F \leq \sigma_{MSM} ; \{d_1, d_2, d_3, d_4, d_5, d_6\} \in [0,1] ; \{f, f_1, f_2\} \in [0,1] ; \{f, f_1, f_2\} \in [0,1] ; \{\alpha, \beta_1, \beta_2\} \in [0, +\infty] ; \{u_1, u_2, u_3, u_4\} \in [-1,1] ; \{\sigma_{MSM}, \sigma_M, \sigma_F, \sigma_I\} \in [0,1] ; \quad (S77)$$

$$(S78)$$

$$d_1 \leq d_2 ; d_3 \leq d_4 ; d_5 \leq d_6 ; d_1 \leq d_3 ; d_2 \leq d_4 ; d_5 \leq d_3 ; d_6 \leq d_4 ;$$

$$\kappa = \{d_1, d_2, d_3, d_4, d_5, d_6, u_1, u_2, u_3, u_4, \alpha, f, \beta_1, \beta_2, f_1, f_2, \sigma_{MSM}, \sigma_M, \sigma_F, \sigma_I\} ; \quad (S79)$$

$$\min w_1 \quad \text{Such that:} \quad (S80)$$

$$\min \left( \begin{array}{l} \text{Lower}(t, \chi^*) = \\ \tilde{Y}_{Total}(t, \chi^*) \cdot \left( \tilde{\theta}_{MSMHIV+}(t, \chi^*) - 1.96 \sqrt{\frac{\tilde{\theta}_{MSMHIV+}(t, \chi^*) (1 - \tilde{\theta}_{MSMHIV+}(t, \chi^*))}{\tilde{Y}_{Total}(t, \chi^*)}} \right) \\ Y_{Total}(t) \cdot \left( \theta_{MSMHIV+}(t) - 1.96 \sqrt{\frac{\theta_{MSMHIV+}(t) (1 - \theta_{MSMHIV+}(t))}{Y_{Total}(t)}} \right) \end{array} \right) ; \quad (S81)$$

$$\max \left( \begin{array}{l} \text{Upper}(t, \chi^*) = \\ \tilde{Y}_{Total}(t, \chi^*) \cdot \left( \tilde{\theta}_{-MSMHIV+}(t, \chi^*) + 1.96 \sqrt{\frac{\tilde{\theta}_{-MSMHIV+}(t, \chi^*) (1 - \tilde{\theta}_{-MSMHIV+}(t, \chi^*))}{\tilde{Y}_{Total}(t, \chi^*)}} \right) \\ Y_{Total}(t) \cdot \left( \theta_{MSMHIV+}(t) + 1.96 \sqrt{\frac{\theta_{MSMHIV+}(t) (1 - \theta_{MSMHIV+}(t))}{Y_{Total}(t)}} \right) \end{array} \right) ; \quad (S82)$$

$$(S83)$$

$$\Omega 1 = (1 - w_1)\Theta^* + w_1\chi^* ; \text{Lower}(t, \chi^*) \leq \tilde{Y}_{-MSMHIV+}(t, \Omega 1) \leq \text{Upper}(t, \chi^*) ;$$

$$\beta_2 \leq \beta_1 ; f_2 \leq f_1 ; 0 \leq w_1 \leq 1 ; \quad (S84)$$

$$\sigma_M \leq \sigma_F \leq \sigma_{MSM} ; \{d_1, d_2, d_3, d_4, d_5, d_6\} \in [0,1] ; \{f, f_1, f_2\} \in [0,1] ; \quad (S85)$$

$$(S86)$$

$$\{f, f_1, f_2\} \in [0,1] ; \{\alpha, \beta_1, \beta_2\} \in [0, +\infty] ; \{u_1, u_2, u_3, u_4\} \in [-1,1] ; \{\sigma_{MSM}, \sigma_M, \sigma_F, \sigma_I\} \in [0,1] ;$$

$$d_1 \leq d_2 ; d_3 \leq d_4 ; d_5 \leq d_6 ; d_1 \leq d_3 ; d_2 \leq d_4 ; d_5 \leq d_3 ; d_6 \leq d_4 ; \quad (S87)$$

$$\min w_2 \quad (S88)$$

Such that:

$$\min \left( \begin{array}{c} \text{Lower}(t, \kappa^*) = \\ \tilde{Y}_{Total}(t, \kappa^*) \cdot \left( \tilde{\theta}_{PWID,HIV+}(t, \kappa^*) - 1.96 \sqrt{\frac{\tilde{\theta}_{PWID,HIV+}(t, \kappa^*) (1 - \tilde{\theta}_{PWID,HIV+}(t, \kappa^*))}{\tilde{Y}_{Total}(t, \kappa^*)}} \right) \\ Y_{Total}(t) \cdot \left( \theta_{PWID,HIV+}(t) - 1.96 \sqrt{\frac{\theta_{PWID,HIV+}(t) (1 - \theta_{PWID,HIV+}(t))}{Y_{Total}(t)}} \right) \end{array} \right), \quad (\text{S89})$$

$$\max \left( \begin{array}{c} \text{Upper}(t, \kappa^*) = \\ \tilde{Y}_{Total}(t, \kappa^*) \cdot \left( \tilde{\theta}_{PWID,HIV+}(t, \kappa^*) + 1.96 \sqrt{\frac{\tilde{\theta}_{PWID,HIV+}(t, \kappa^*) (1 - \tilde{\theta}_{PWID,HIV+}(t, \kappa^*))}{\tilde{Y}_{Total}(t, \kappa^*)}} \right) \\ Y_{Total}(t) \cdot \left( \theta_{PWID,HIV+}(t) + 1.96 \sqrt{\frac{\theta_{PWID,HIV+}(t) (1 - \theta_{PWID,HIV+}(t))}{Y_{Total}(t)}} \right) \end{array} \right); \quad (\text{S90})$$

$$\Omega 2 = (1 - w_2)\Omega 1^* + w_2\kappa^* ; \text{Lower}(t, \kappa^*) \leq \tilde{Y}_{PWID,HIV+}(t, \Omega 2) \leq \text{Upper}(t, \kappa^*); \quad (\text{S91})$$

$$\beta_2 \leq \beta_1 ; f_2 \leq f_1 ; 0 \leq w_2 \leq 1; \quad (\text{S92})$$

$$\sigma_M \leq \sigma_F \leq \sigma_{MSM} ; \{d_1, d_2, d_3, d_4, d_5, d_6\} \in [0,1] ; \{f, f_1, f_2\} \in [0,1]; \quad (\text{S93})$$

$$\{f, f_1, f_2\} \in [0,1] ; \{\alpha, \beta_1, \beta_2\} \in [0, +\infty] ; \{u_1, u_2, u_3, u_4\} \in [-1,1] ; \{\sigma_{MSM}, \sigma_M, \sigma_F, \sigma_I\} \in [0,1]; \quad (\text{S94})$$

$$d_1 \leq d_2 ; d_3 \leq d_4 ; d_5 \leq d_6 ; d_1 \leq d_3 ; d_2 \leq d_4 ; d_5 \leq d_3 ; d_6 \leq d_4 ; \quad (\text{S95})$$

$$\min \left( \frac{|idu\tilde{in}(t, \Omega 3) - iduin(t)|}{iduin(t)} + \frac{|in(\tilde{\Omega 3}) - in(t)|}{in(t)} \right) \quad (\text{S96})$$

Such that:

$$\Omega 2^* - \delta_2 \leq \Omega 3 \leq \Omega 2^* + \delta_1 \quad (\text{S97})$$

$$\beta_2 \leq \beta_1 ; f_2 \leq f_1 ; \quad (\text{S98})$$

$$\sigma_F \leq \sigma_{MSM} ; \{d_1, d_2, d_3, d_4, d_5, d_6\} \in [0,1] ; \{f, f_1, f_2\} \in [0,1]; \quad (\text{S99})$$

$$\{f, f_1, f_2\} \in [0,1] ; \{\alpha, \beta_1, \beta_2\} \in [0, +\infty] ; \{u_1, u_2, u_3, u_4\} \in [-1,1] ; \{\sigma_{MSM}, \sigma_M, \sigma_F, \sigma_I\} \in [0,1]; \quad (\text{S100})$$

$$d_1 \leq d_2 ; d_3 \leq d_4 ; d_5 \leq d_6 ; d_1 \leq d_3 ; d_2 \leq d_4 ; d_5 \leq d_3 ; d_6 \leq d_4 ; \quad (\text{S101})$$

## 2.5 Model Validation

The Model is validated against HIV prevalence and HIV incidence 2015-2016. The final validation results are contained in the table S5. The HIV prevalence estimates among PWID, as well as estimates on the population size of PWID and MSM are derived from bi-annual integrated bio-behavioral survey (IBBS), data collected and published by AIDS Alliance in Ukraine<sup>14-16</sup>. Due to high variability within city estimates from 2011-2015, stemming from RDS-based small samples, we developed an extension of an EM Algorithm to calculate the weighted average HIV prevalence in the time interval, as the data published in not sufficient in scope and duration to analyze the time-series properties of the statistics.<sup>17</sup> Figures S2-S25 Panel (A) contain EM estimates as well as the depiction of the original data.

The HIV incidence by region is based on the number of reported new infections as published by Ministry of Health.<sup>8</sup> The number of new diagnosed infections is weighted by the proportion of population aware of their HIV infection as published by UNAIDS. We calculated the rate of incidence per year using the number of HIV negative population among PWID and non-PWID members in the denominator. In addition, we analyzed our estimate of incidence of HIV among PWID to the HIV incidence rate that was provided to us from the 2017 IBBS, which for the first time, included incidence data using recent HIV infection algorithms. Overall we found that the estimates from the two sources to be very close to one another, and in our study is based on data published by the Ukrainian Ministry of Health (Center for Public Health).

Table S5: Model Validation

| Regions     | HIV Prevalence        |                         | HIV Incidence      |                      |
|-------------|-----------------------|-------------------------|--------------------|----------------------|
|             | Data                  | Model                   | Data               | Model                |
| Dnipro      | 32.54<br>(28.4, 36.6) | 32.28<br>(31.44-33.11)  | 4.94<br>(4.7, 5.2) | 5.69<br>(5.10, 7.49) |
| Odesa       | 31.04<br>(26.8, 35.3) | 30.10<br>(28.60-32.24)  | 2.16<br>(2.0, 2.3) | 3.40<br>(2.09, 6.96) |
| Kyiv (city) | 21.39 (17.4,<br>25.4) | 21.32<br>(19.95-22.4)   | 2.13<br>(2.0, 2.3) | 2.18<br>(1.81, 2.35) |
| Kharkiv     | 10.47<br>(6.2, 14.7)  | 10.44<br>(9.31-11.33)   | 1.55<br>(1.3, 1.8) | 1.37<br>(0.80, 1.58) |
| Sumy        | 7.2<br>(3.1, 11.3)    | 7.15<br>(6.35-7.73)     | 0.82<br>(0.7, 1.0) | 0.81<br>(0.45, 0.94) |
| Zaporizhia  | 7.58<br>(3.3, 11.8)   | 7.74<br>(6.61-8.75)     | 2.82<br>(2.5, 3.2) | 2.23<br>(1.55, 2.62) |
| Mykolaiv    | 34.71<br>(30.5, 38.9) | 32.66<br>(31.32-34.25)  | 2.45<br>(2.1, 2.8) | 4.53<br>(2.35, 6.38) |
| Cherkasy    | 21.41<br>(17.1, 25.7) | 20.04<br>(17.69-22.28)  | 2.83<br>(2.5, 3.2) | 2.63<br>(1.24, 3.10) |
| Lviv        | 21.83<br>(17.8, 25.9) | 20.64 (18.68-<br>22.92) | 2.74<br>(2.4, 3.1) | 2.74<br>(1.73, 3.56) |
| Kherson     | 24.73<br>(20.5, 29.0) | 24.48<br>(22.28-26.89)  | 2.76<br>(2.4, 3.1) | 2.83<br>(1.91, 4.73) |



|                 |                       |                         |                    |                      |
|-----------------|-----------------------|-------------------------|--------------------|----------------------|
| Kirovohrad      | 11.03<br>(7.5, 14.6)  | 11.60<br>(10.42-12.47)  | 2.24<br>(1.9, 2.6) | 1.89<br>(1.51, 2.11) |
| Khmelnyskyi     | 27.38<br>(23.3, 31.5) | 23.00<br>(20.20-25.18)  | 0.57<br>(0.4, 0.8) | 0.82<br>(0.57, 1.19) |
| Poltava         | 23.38<br>(16.6, 30.2) | 23.28<br>(21.57-24.57)  | 2.48<br>(2.1, 2.9) | 4.11<br>(3.01, 4.55) |
| Kyiv            | 23.05<br>(18.3, 27.8) | 23.98<br>(20.84- 26.74) | 4.85<br>(4.3, 5.4) | 7.8<br>(4.48, 9.34)  |
| Chernihiv       | 30.13 (25.4,<br>34.9) | 30.59<br>(28.74-33.17)  | 5.11<br>(4.5, 5.7) | 4.8<br>(3.3, 5.2)    |
| Volyn           | 20.24 (15.7,<br>24.7) | 17.21<br>(15.83-19.06)  | 1.15<br>(0.8, 1.5) | 1.52<br>(0.58, 4.46) |
| Vinnytsia       | 11.31<br>(7.4, 15.2)  | 10.32<br>(9.35-10.88)   | 1.01<br>(0.8, 1.3) | 1.10<br>(0.96, 1.20) |
| Rivne           | 14.5<br>(11.0, 18.0)  | 12.67<br>(10.90-14.29)  | 1.60<br>(1.2, 2)   | 1.66<br>(0.63, 2.48) |
| Ternopil        | 11.93<br>(8.5, 15.3)  | 9.71<br>(7.80-11.68)    | 0.56<br>(0.3, 0.8) | 0.67<br>(0.54, 0.80) |
| Ivano-Frankivsk | 17.42<br>(13.5, 21.4) | 14.36<br>(12.29-16.13)  | 1.71<br>(1.3, 2.2) | 1.50<br>(0.46, 1.78) |
| Chernivtsi      | 4.58<br>(1.2, 7.9)    | 4.05<br>(2.66-5.07)     | 0.62<br>(0.4, 0.9) | 0.58<br>(0.25, 1.0)  |
| Zhytomyr        | 18.96<br>(14.9, 23.1) | 19.44<br>(17.45-20.85)  | 6.95<br>(6.0, 7.9) | 5.23<br>(3.17, 5.92) |
| Zakarpattia     | 1.59<br>(0.004, 3.3)  | 1.39<br>(1.19-1.58)     | 0.44<br>(0.2, 0.7) | 0.34<br>(0.25, 0.42) |

Source: Calculation based on data from IBBS & Ukrainian Center for Socially Dangerous Disease Control

## Regional Plots Description

For each of the regions (Panel A below), we provide the following depictions for trajectories of HIV prevalence, new HIV infections and deaths. For HIV prevalence, we depict in red diamonds published point estimates from the Alliance for Public Health published reports from 2011 to 2016 (with error bars capturing the published 95% confidence interval), a straight red line is estimated prevalence based on application of expectation maximization algorithm to the available data; followed by the projected prevalence in our status quo model. The Status Quo (SQ) scenario is based on assumption of no additional OAT scale-up. For new infections and death, we provide the trajectory over time with 95% confidence limits. For Panel B, we first provide the estimation for PWID population size, where the red dots represent the means of the numbers of PWID in the region, with the red lines representing the 95% confidence intervals for the population estimates for the region. Thereafter, the number of PWID from the model projection is presented. In the next two figures is the number of projected HIV infections and deaths averted over time at various levels of OAT coverage. Panel C is the sensitivity analysis for the region for deaths and new infections averted, which is varied by population size.

Figure S2. Region: Dnipro (1)

Data and Model Projections Under Different OAT Scale-up Scenarios

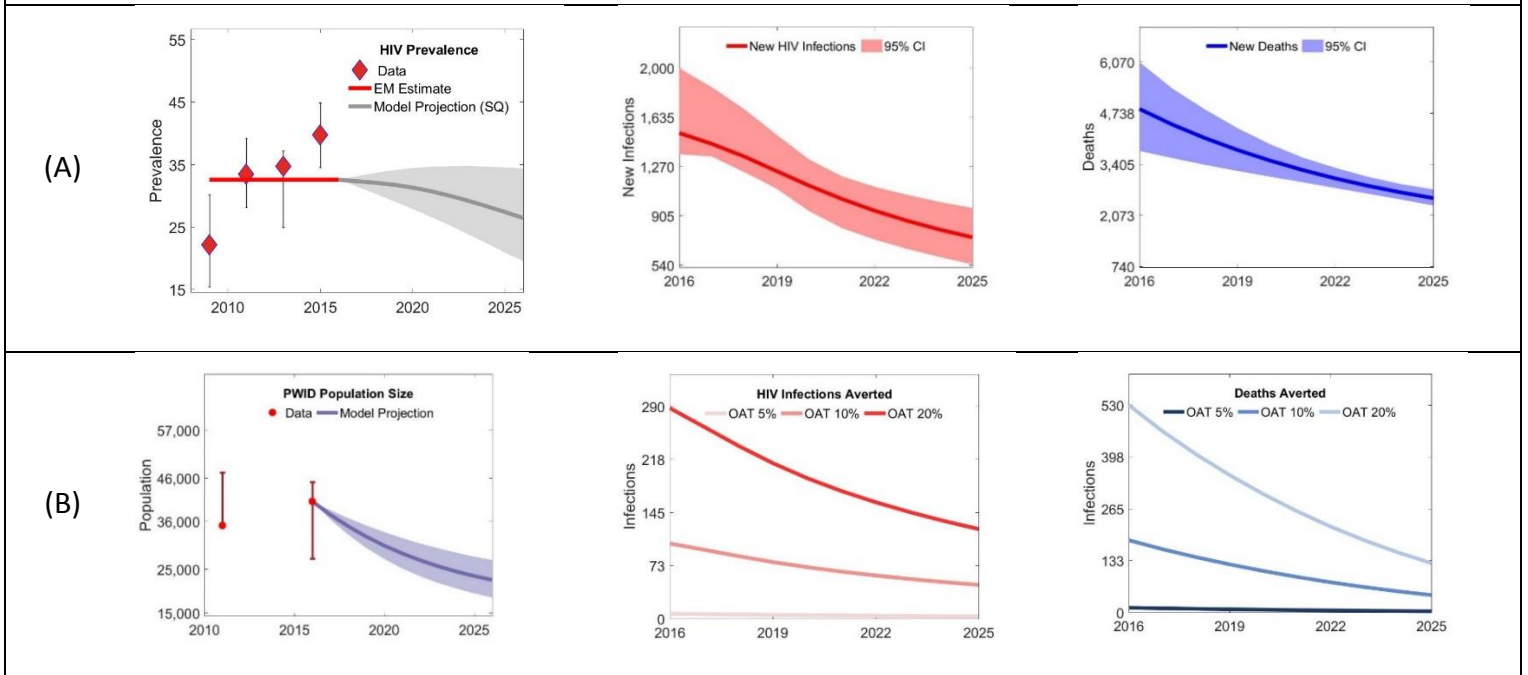

Footnote (A/B): In the projection of status quo, the line represents the mean; the shaded region - 95% confidence interval. EM stands for expectation maximization; (B) The circle represents point estimate for population size; error bar – max/min range.

Sensitivity Analysis: Population Size and ART

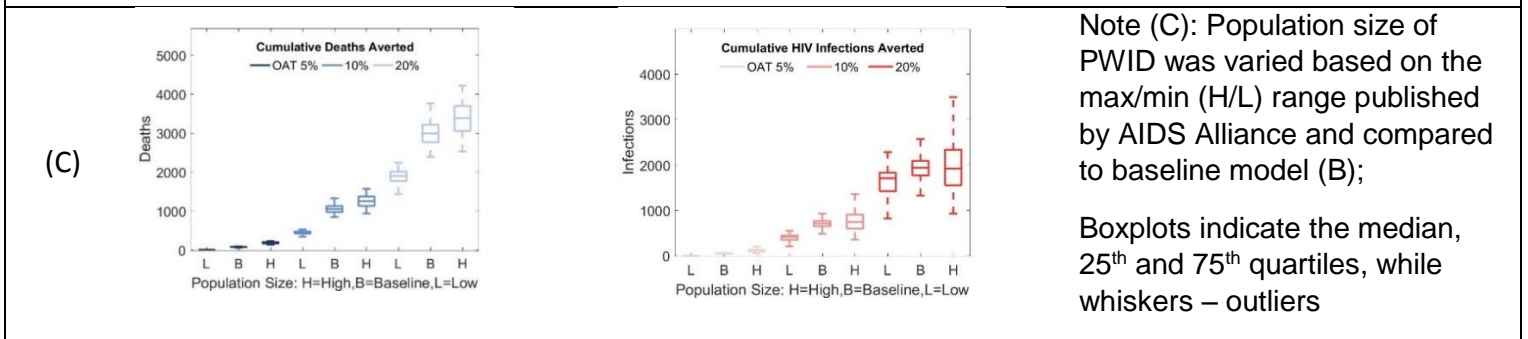

Note (C): Population size of PWID was varied based on the max/min (H/L) range published by AIDS Alliance and compared to baseline model (B);

Boxplots indicate the median, 25<sup>th</sup> and 75<sup>th</sup> quartiles, while whiskers – outliers

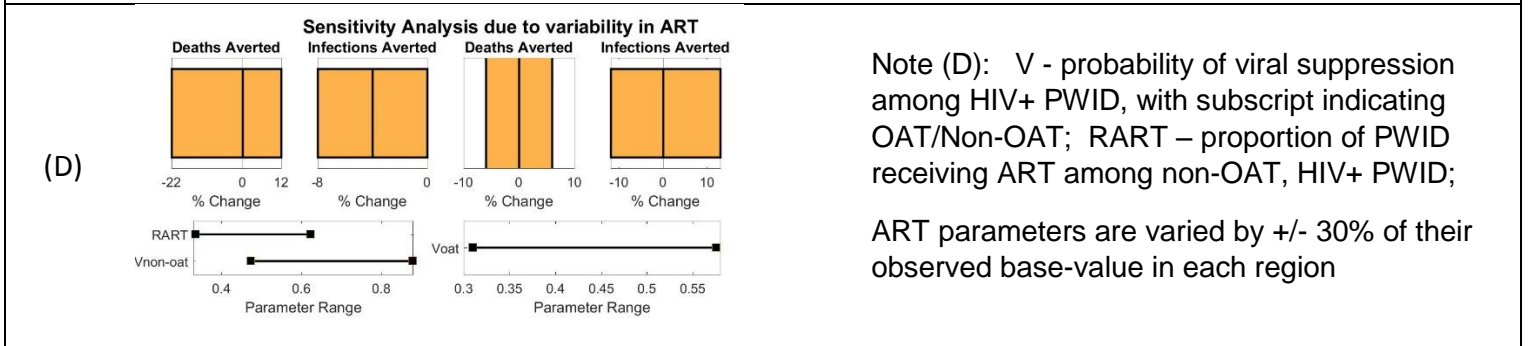

Note (D): V - probability of viral suppression among HIV+ PWID, with subscript indicating OAT/Non-OAT; RART – proportion of PWID receiving ART among non-OAT, HIV+ PWID;

ART parameters are varied by +/- 30% of their observed base-value in each region

Figure S3: Region: **Odesa**

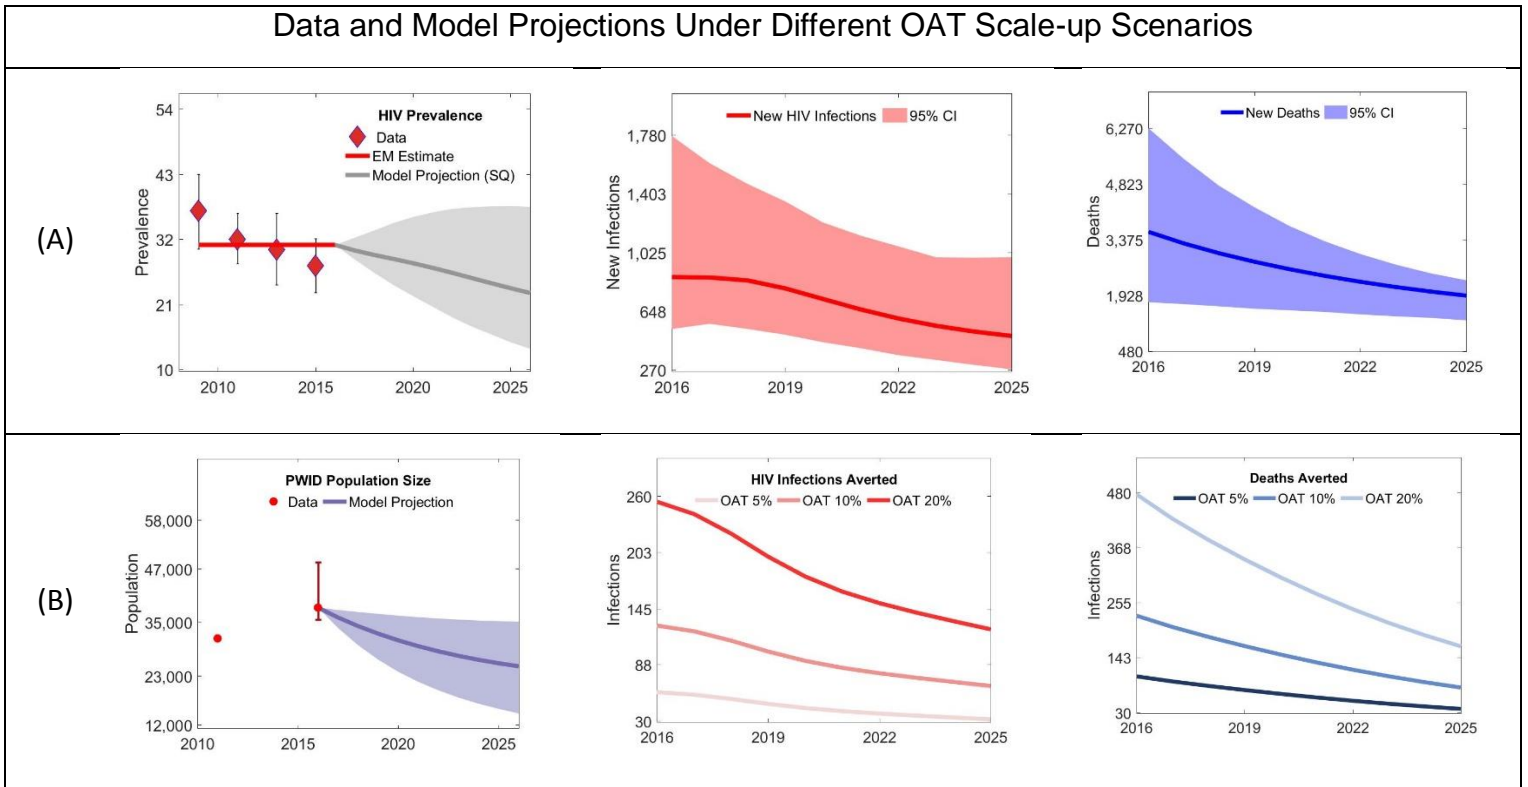

Footnote (A/B): In the projection of status quo, the line represents the mean; the shaded region - 95% confidence interval. EM stands for expectation maximization; (B) The circle represents point estimate for population size; error bar – max/min range.

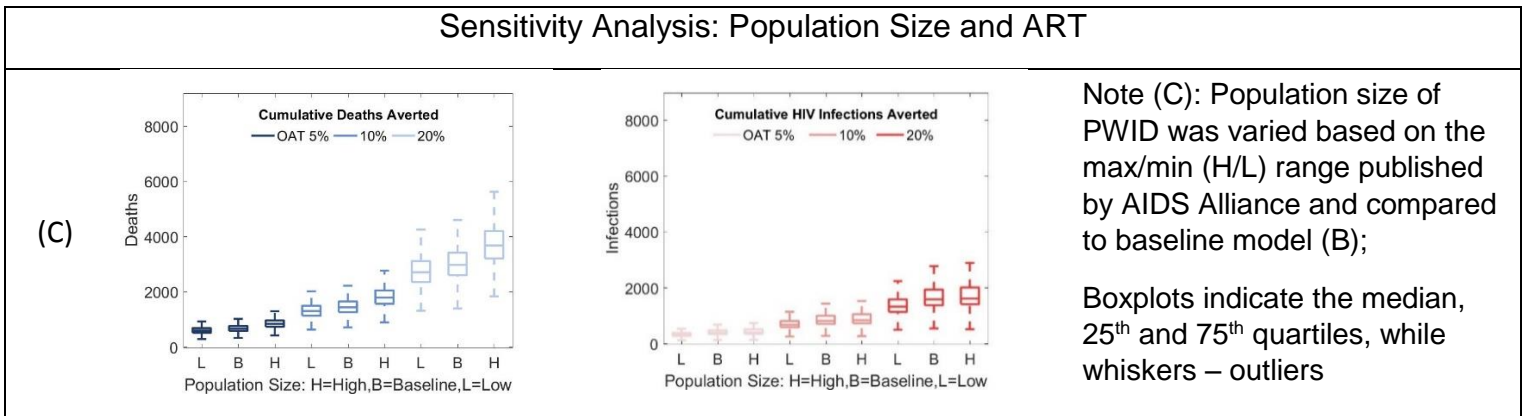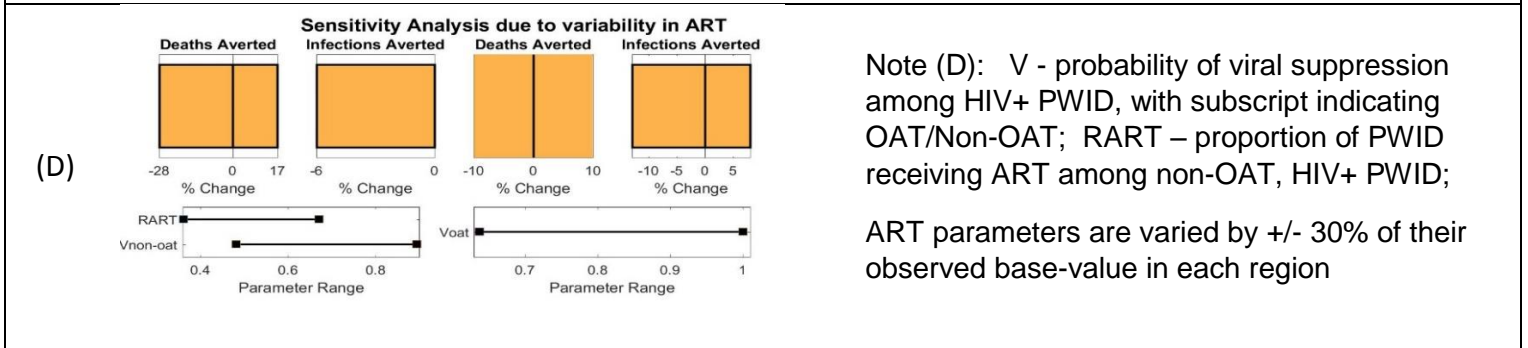

Figure S4. Region: **Kyiv City**

Data and Model Projections Under Different OAT Scale-up Scenarios

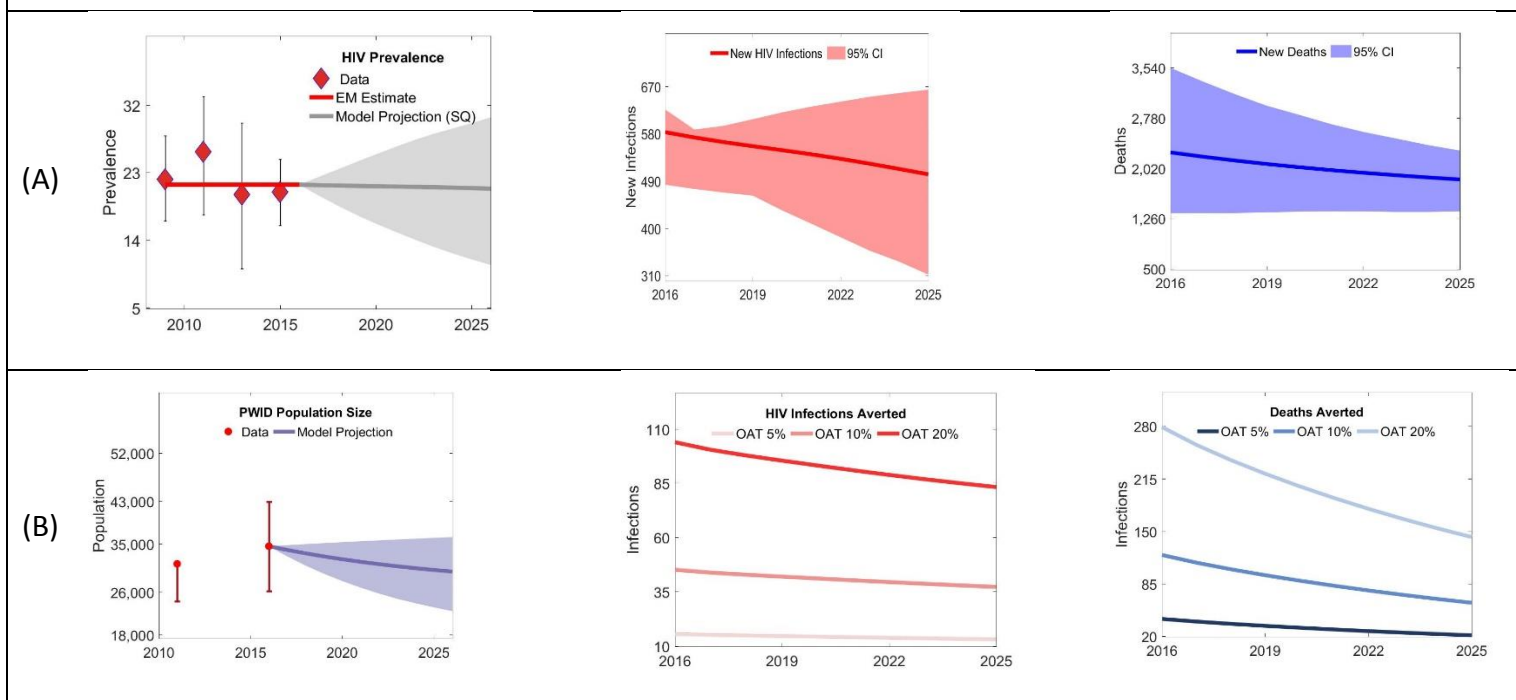

Footnote (A/B): In the projection of status quo, the line represents the mean; the shaded region - 95% confidence interval. EM stands for expectation maximization; (B) The circle represents point estimate for population size; error bar – max/min range.

Sensitivity Analysis: Population Size and ART

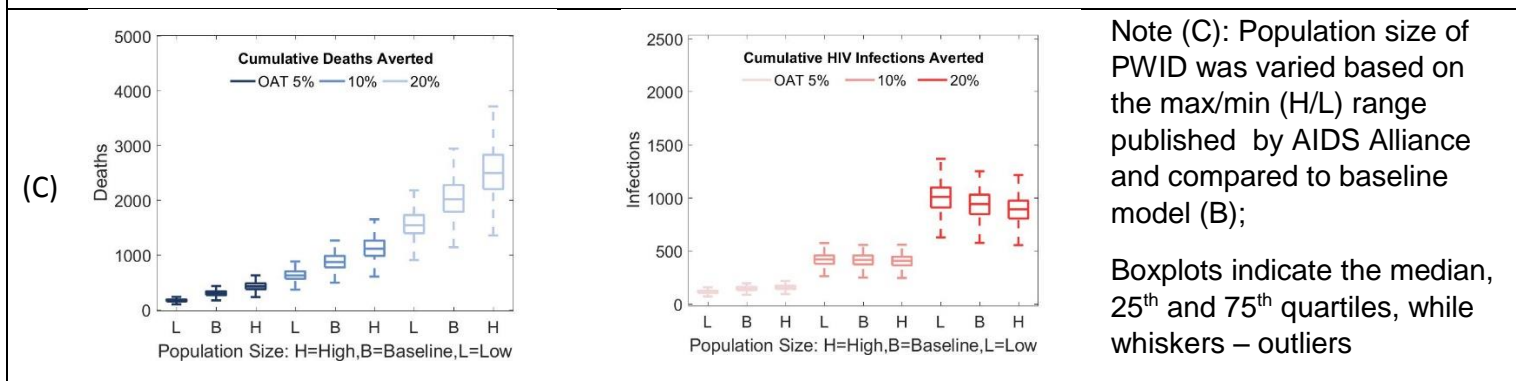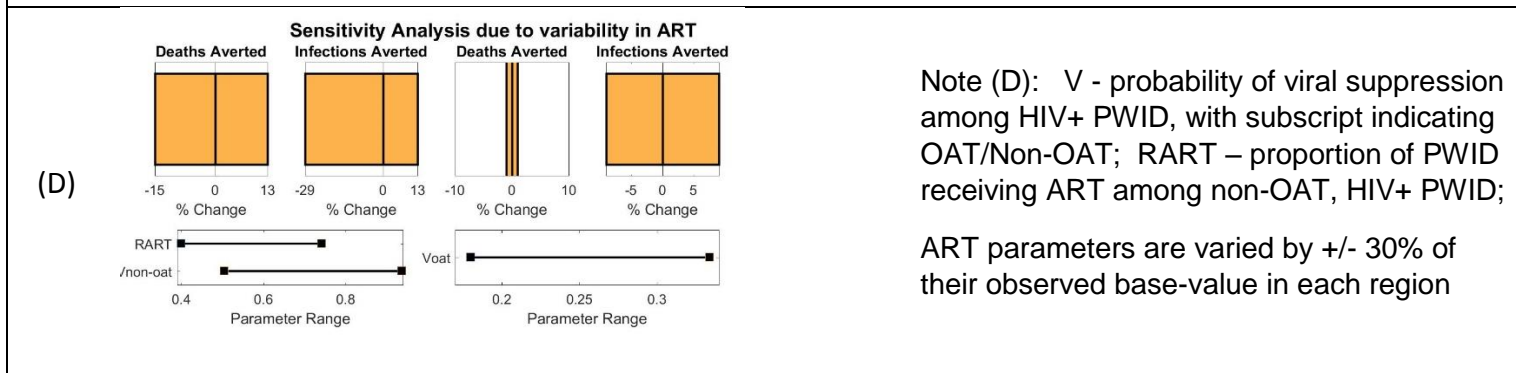

Figure S5. Region: **Kharkiv**

Data and Model Projections Under Different OAT Scale-up Scenarios

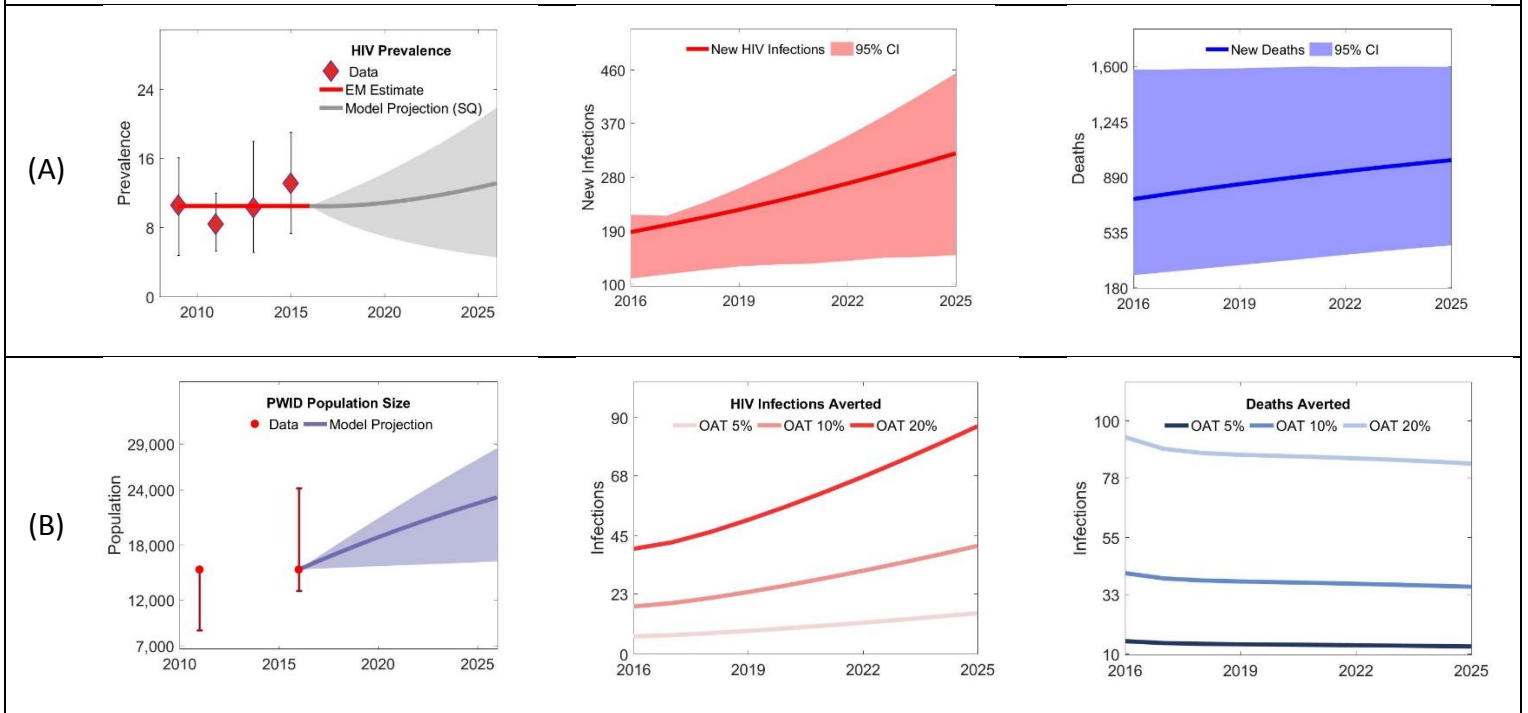

Footnote (A/B): In the projection of status quo, the line represents the mean; the shaded region - 95% confidence interval. EM stands for expectation maximization; (B) The circle represents point estimate for population size; error bar – max/min range.

Sensitivity Analysis: Population Size and ART

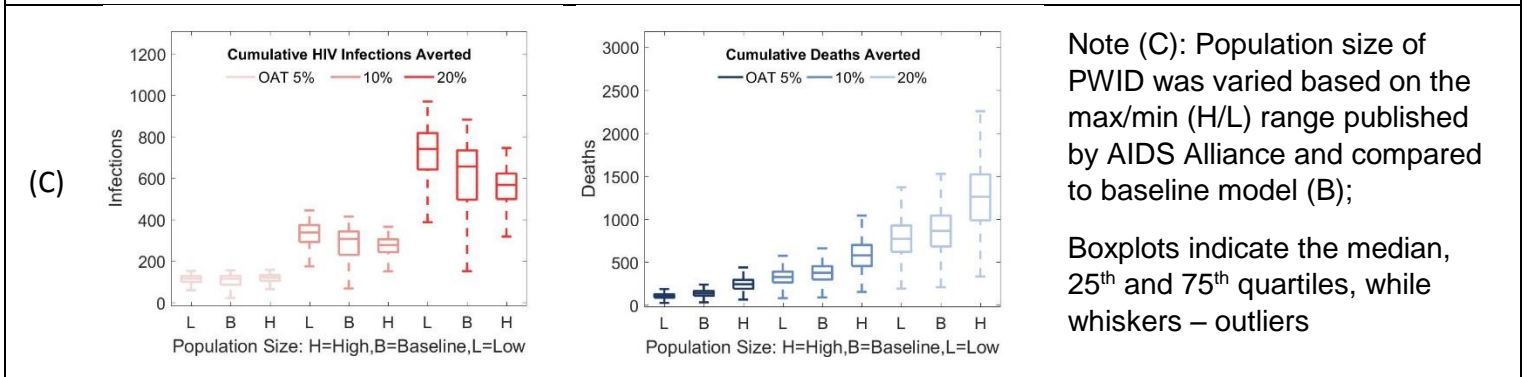

Note (C): Population size of PWID was varied based on the max/min (H/L) range published by AIDS Alliance and compared to baseline model (B);

Boxplots indicate the median, 25<sup>th</sup> and 75<sup>th</sup> quartiles, while whiskers – outliers

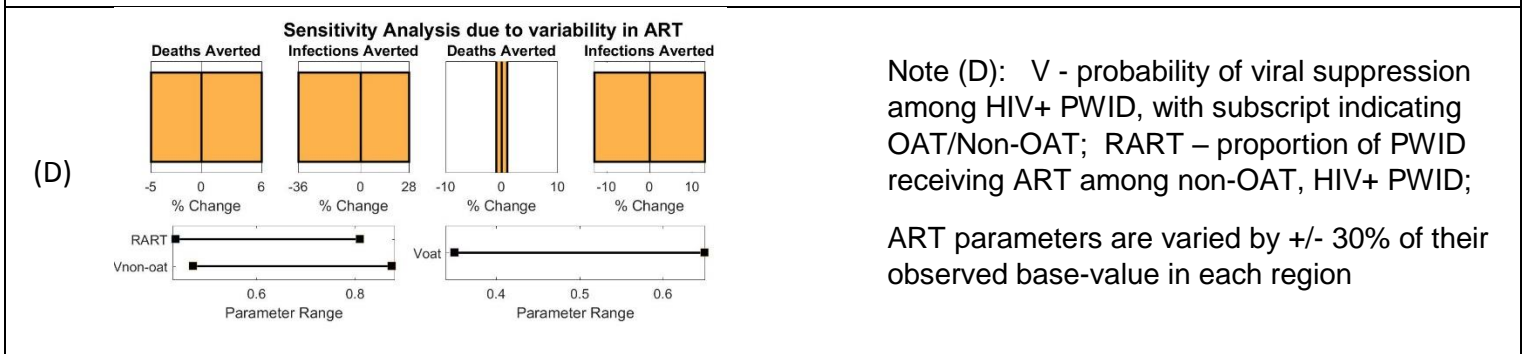

Note (D): V - probability of viral suppression among HIV+ PWID, with subscript indicating OAT/Non-OAT; RART – proportion of PWID receiving ART among non-OAT, HIV+ PWID;

ART parameters are varied by +/- 30% of their observed base-value in each region



Figure S6. Region: **Sumy**

Data and Model Projections Under Different OAT Scale-up Scenarios

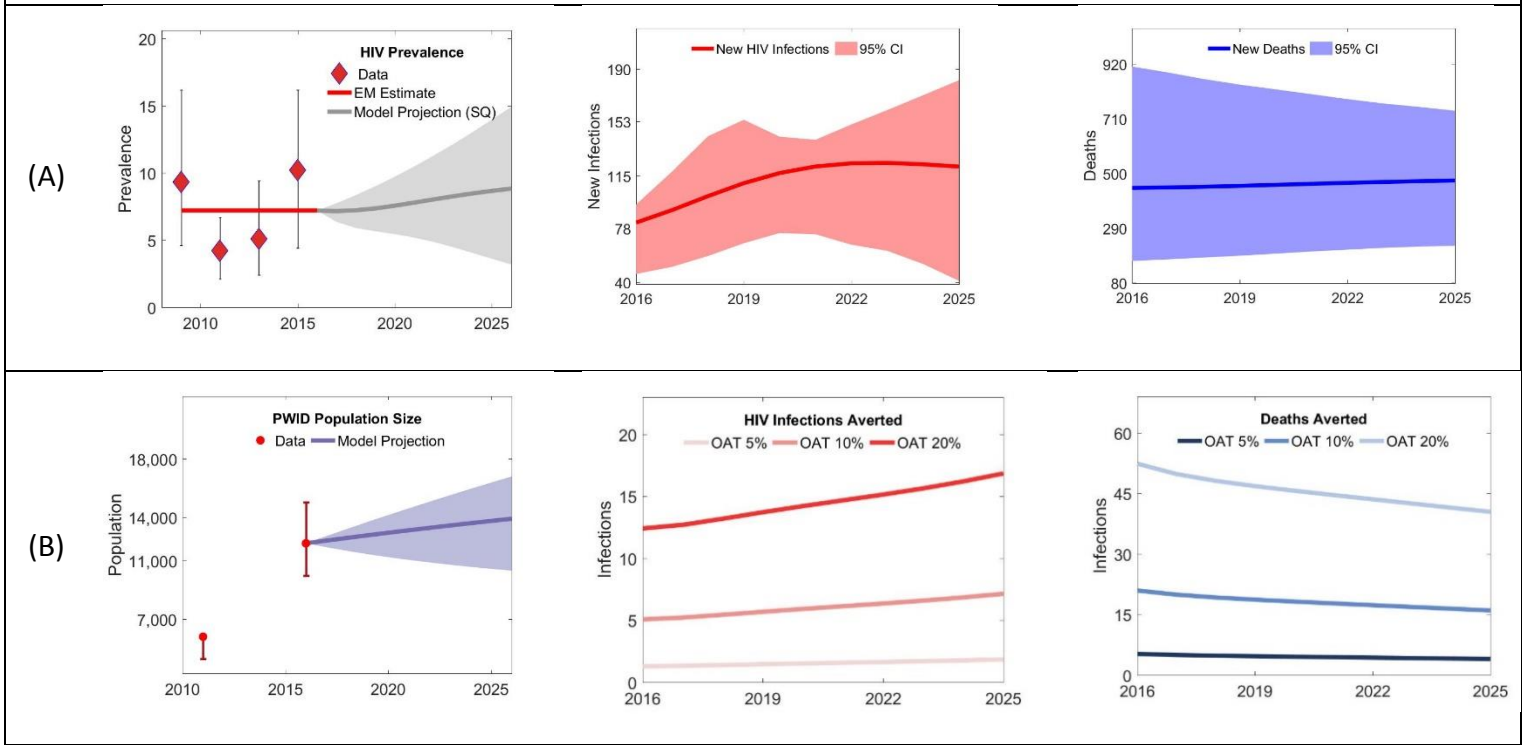

Footnote (A/B): In the projection of status quo, the line represents the mean; the shaded region - 95% confidence interval. EM stands for expectation maximization; (B) The circle represents point estimate for population size; error bar – max/min range.

Sensitivity Analysis: Population Size and ART

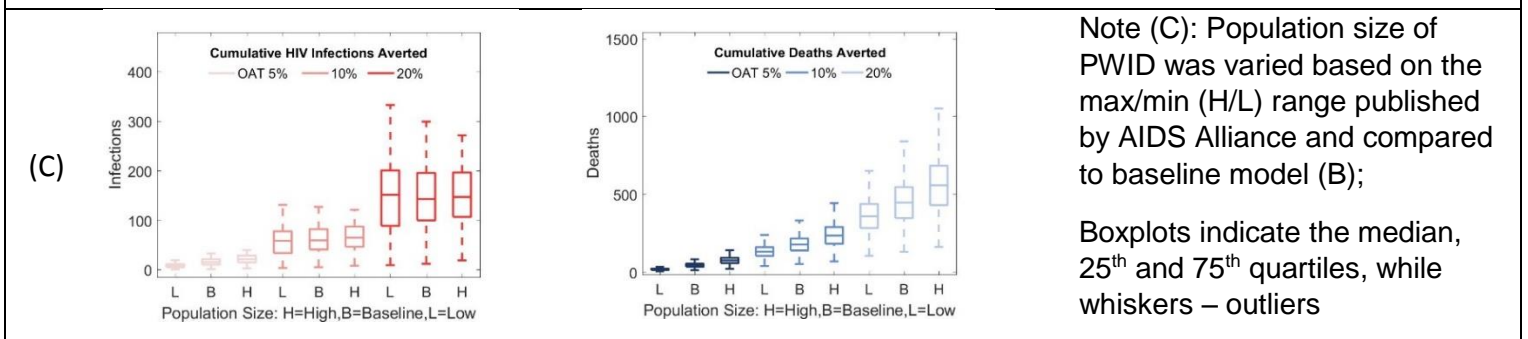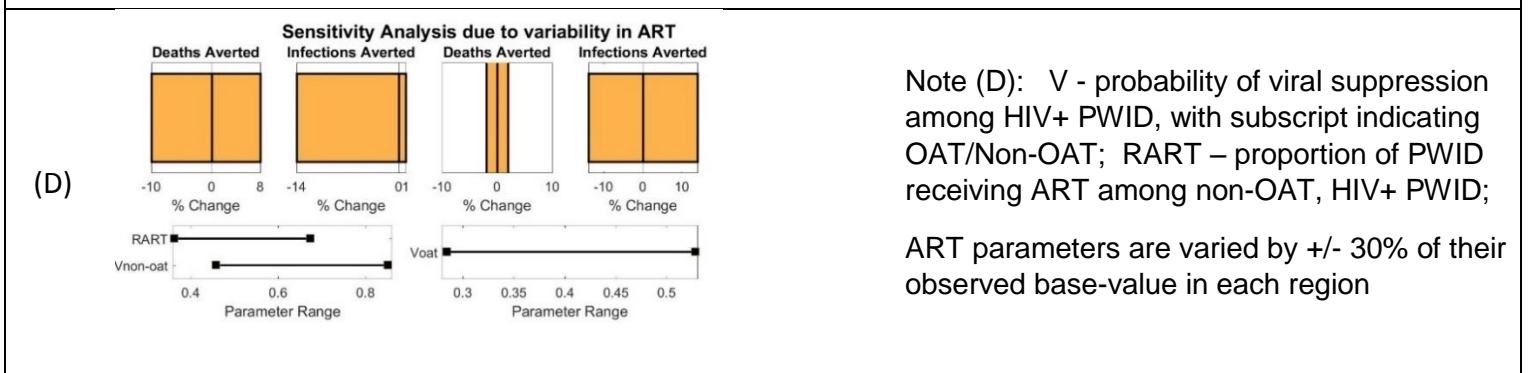

Figure S7. Region: **Zaporizhia**

Data and Model Projections Under Different OAT Scale-up Scenarios

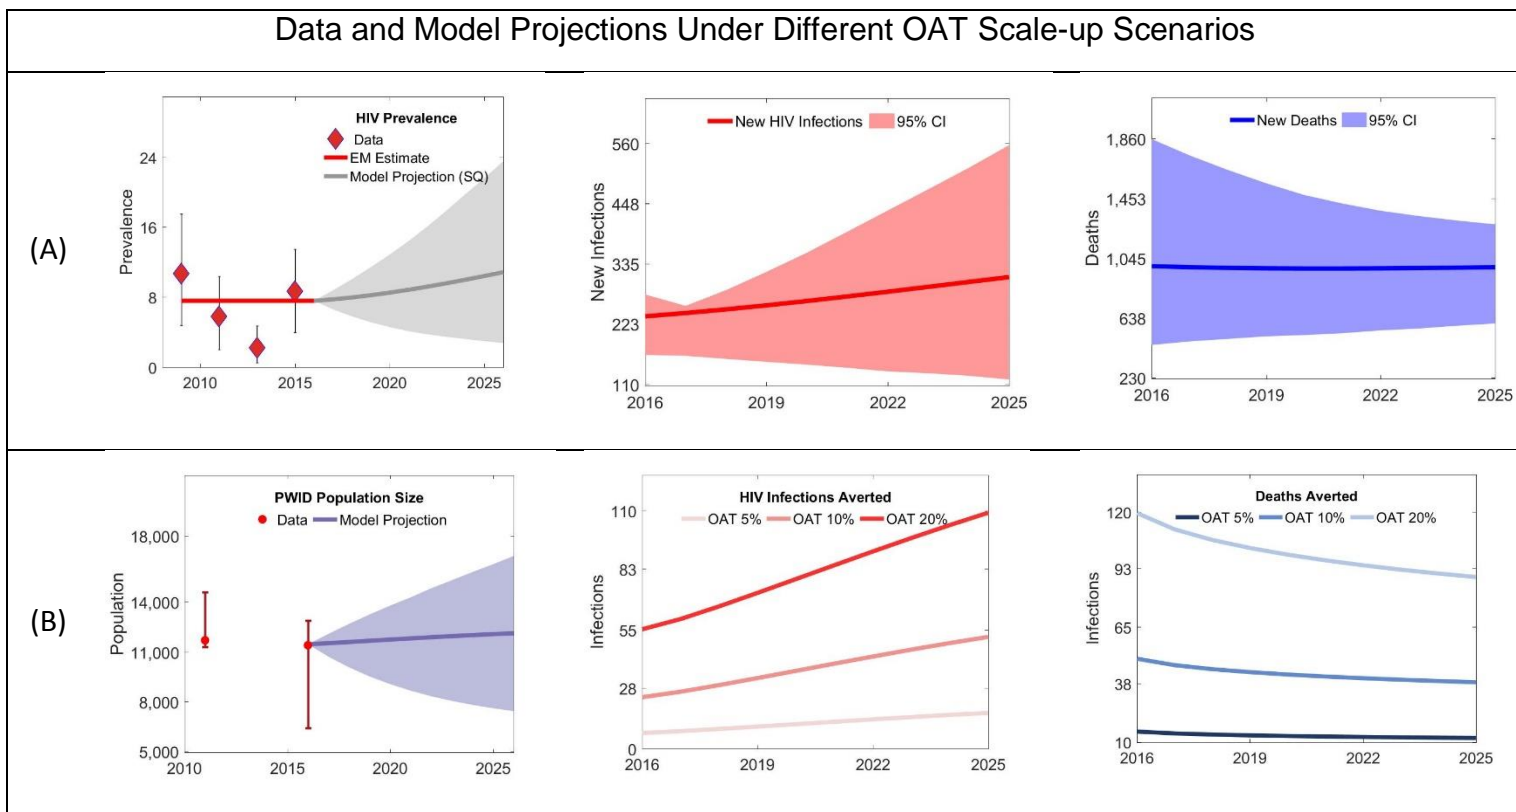

Footnote (A/B): In the projection of status quo, the line represents the mean; the shaded region - 95% confidence interval. EM stands for expectation maximization; (B) The circle represents point estimate for population size; error bar – max/min range.

Sensitivity Analysis: Population Size and ART

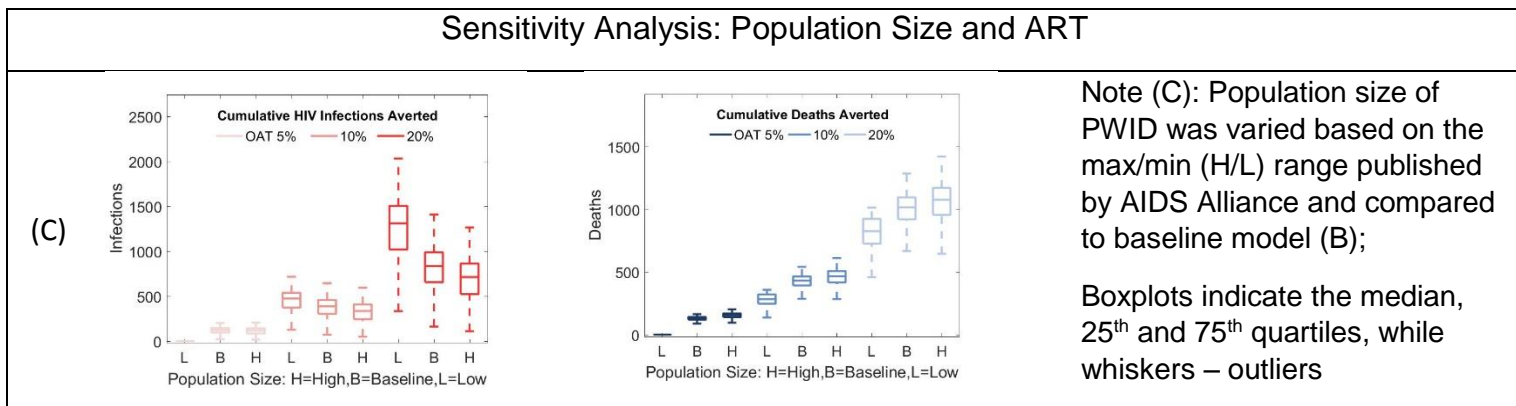

Note (C): Population size of PWID was varied based on the max/min (H/L) range published by AIDS Alliance and compared to baseline model (B);

Boxplots indicate the median, 25<sup>th</sup> and 75<sup>th</sup> quartiles, while whiskers – outliers

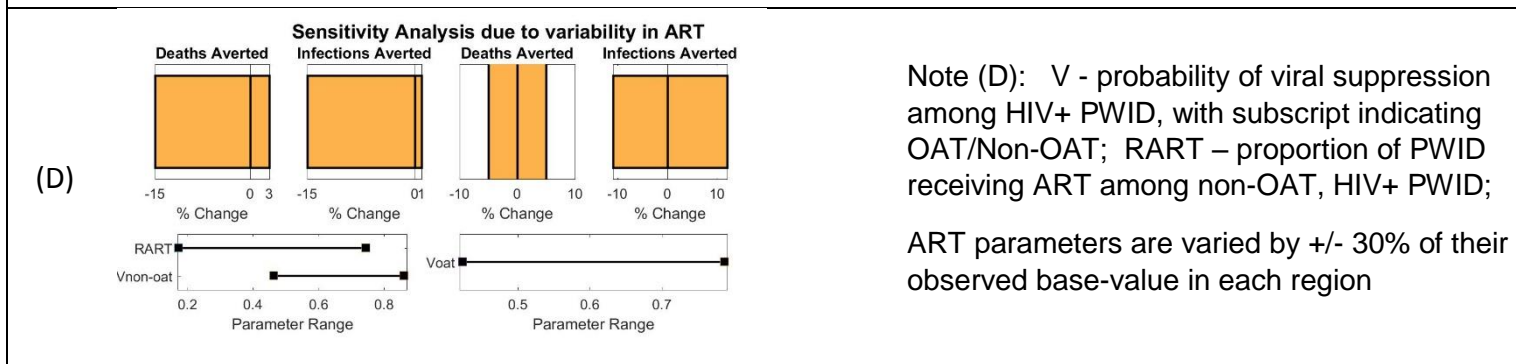

Note (D): V - probability of viral suppression among HIV+ PWID, with subscript indicating OAT/Non-OAT; RART – proportion of PWID receiving ART among non-OAT, HIV+ PWID;

ART parameters are varied by +/- 30% of their observed base-value in each region



Figure S8. Region: **Mykolaiv**

Data and Model Projections Under Different OAT Scale-up Scenarios

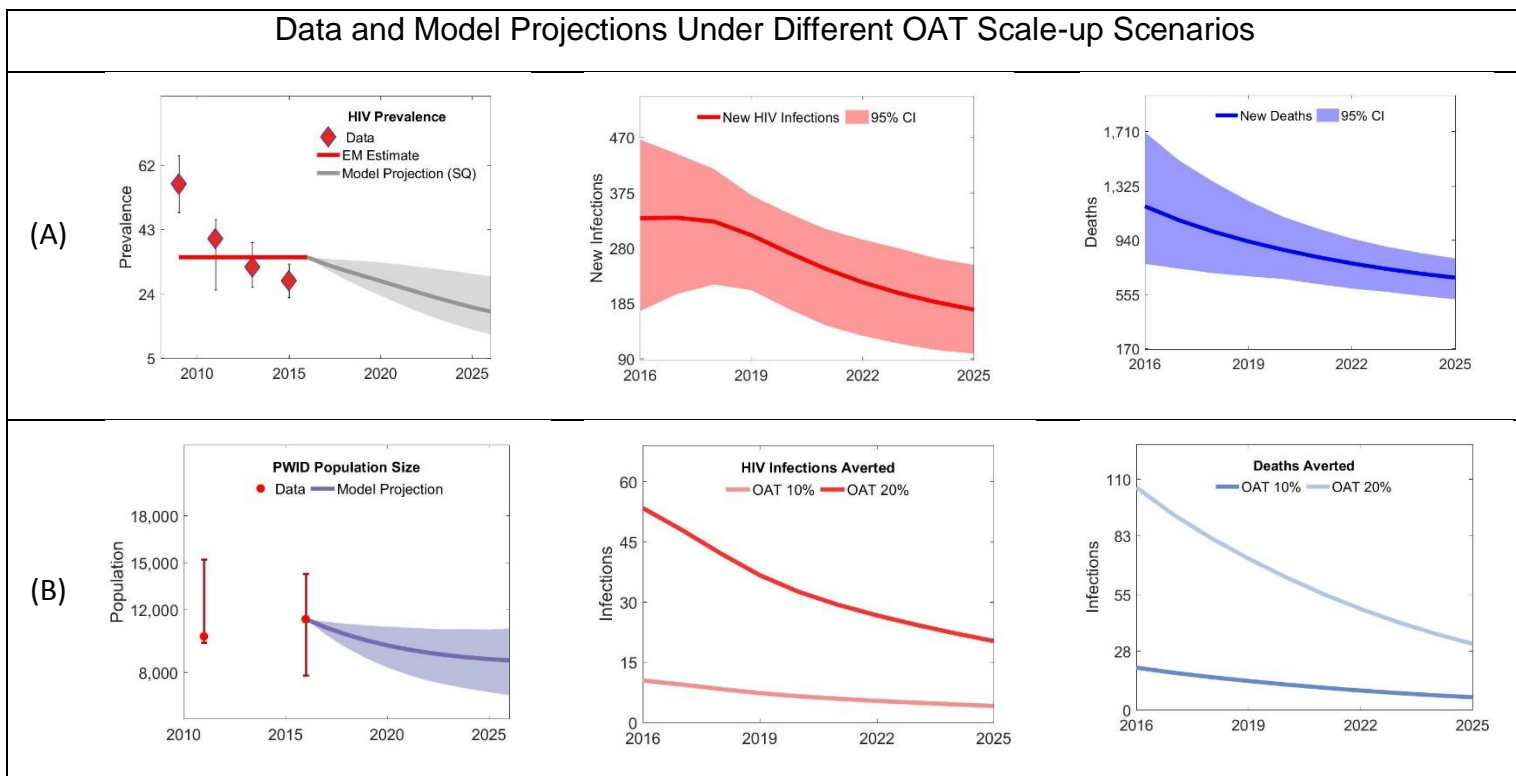

Footnote (A/B): In the projection of status quo, the line represents the mean; the shaded region - 95% confidence interval. EM stands for expectation maximization; (B) The circle represents point estimate for population size; error bar – max/min range.

Sensitivity Analysis: Population Size and ART

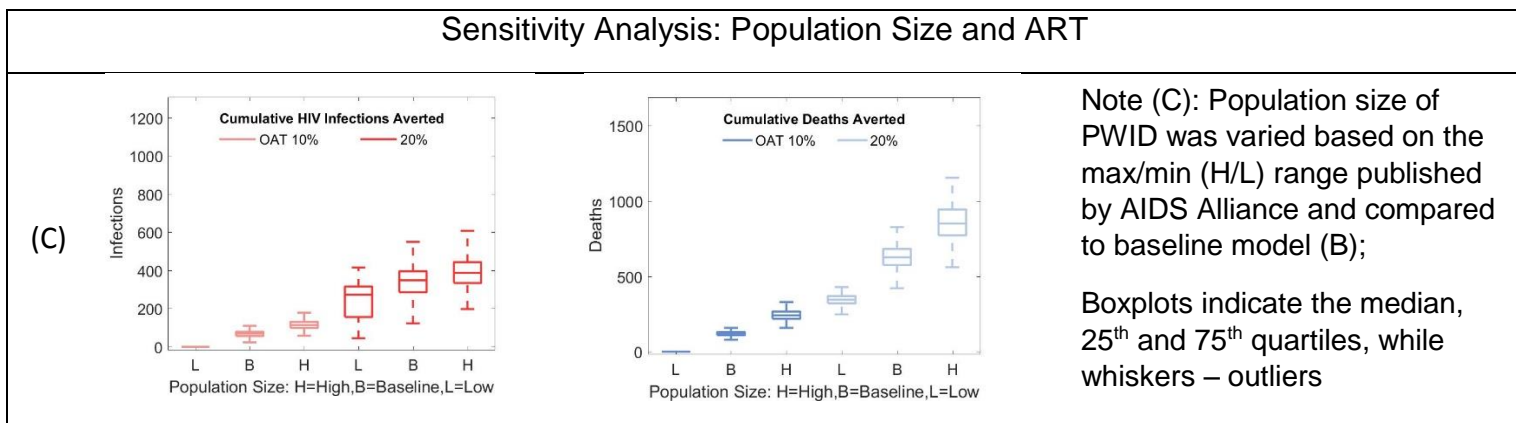

Note (C): Population size of PWID was varied based on the max/min (H/L) range published by AIDS Alliance and compared to baseline model (B);

Boxplots indicate the median, 25<sup>th</sup> and 75<sup>th</sup> quartiles, while whiskers – outliers

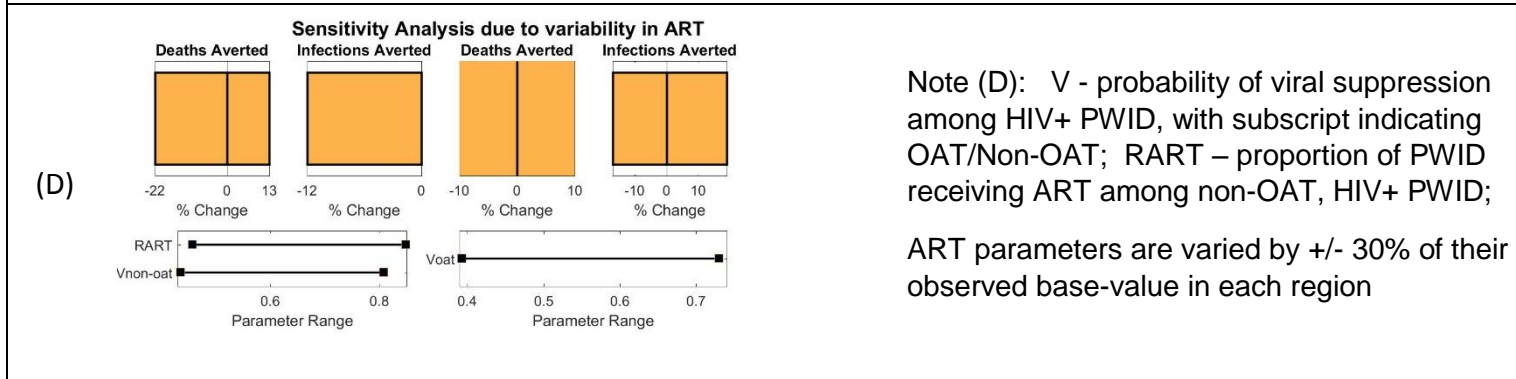

Note (D): V - probability of viral suppression among HIV+ PWID, with subscript indicating OAT/Non-OAT; RART – proportion of PWID receiving ART among non-OAT, HIV+ PWID;

ART parameters are varied by +/- 30% of their observed base-value in each region

Figure S9. Region: **Cherkasy**

Data and Model Projections Under Different OAT Scale-up Scenarios

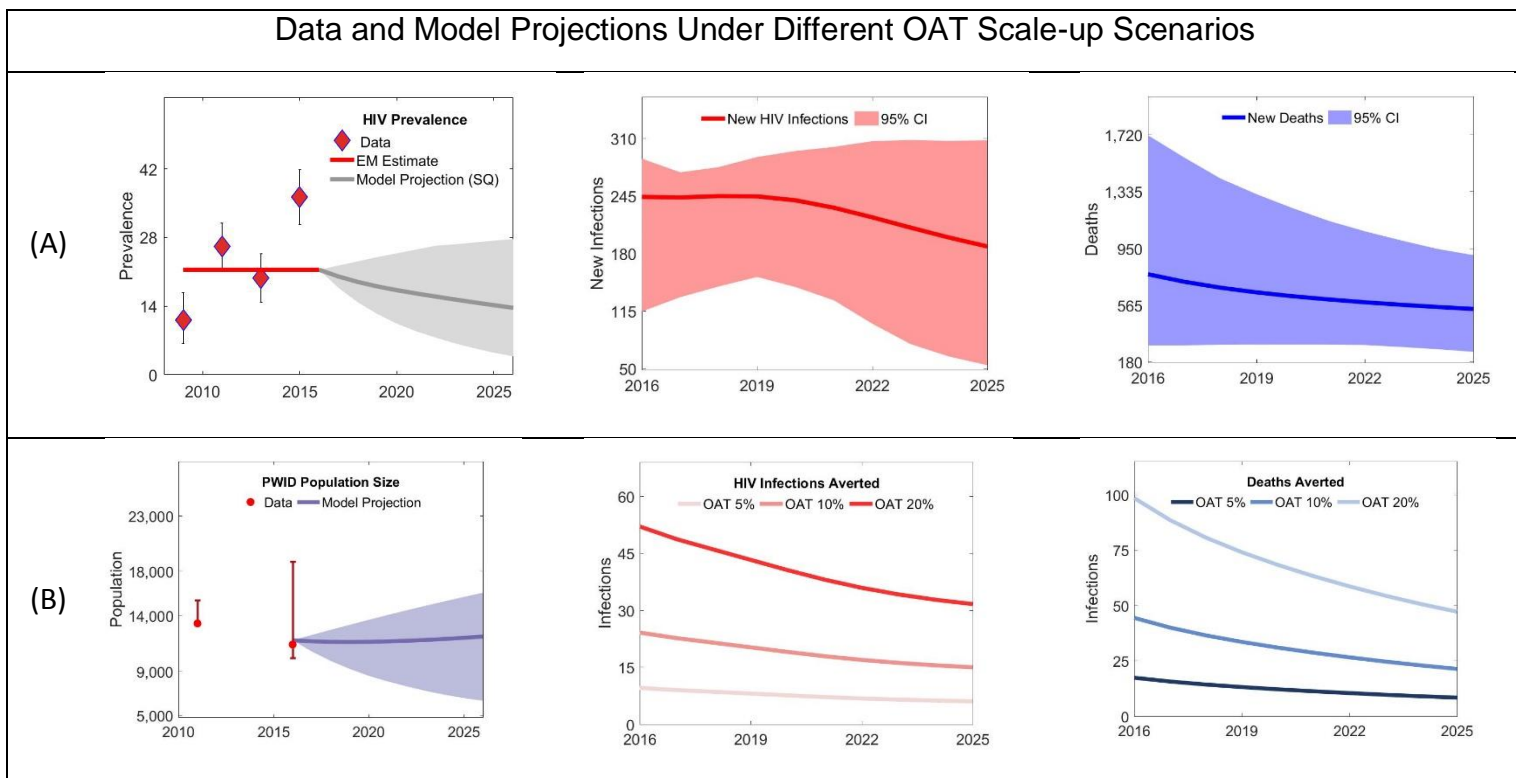

Footnote (A/B): In the projection of status quo, the line represents the mean; the shaded region - 95% confidence interval. EM stands for expectation maximization; (B) The circle represents point estimate for population size; error bar – max/min range.

Sensitivity Analysis: Population Size and ART

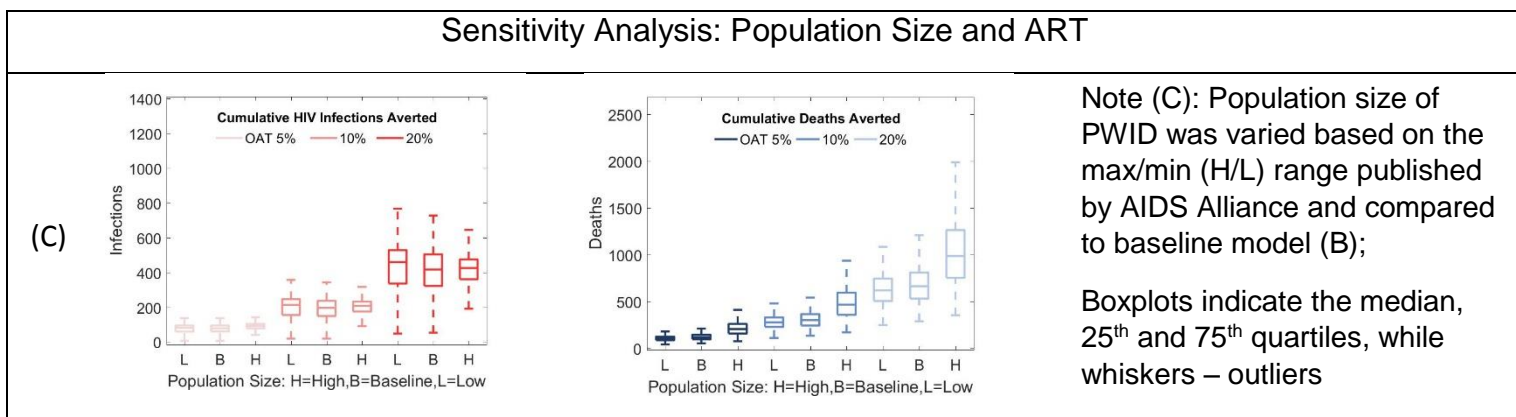

Note (C): Population size of PWID was varied based on the max/min (H/L) range published by AIDS Alliance and compared to baseline model (B);

Boxplots indicate the median, 25<sup>th</sup> and 75<sup>th</sup> quartiles, while whiskers – outliers

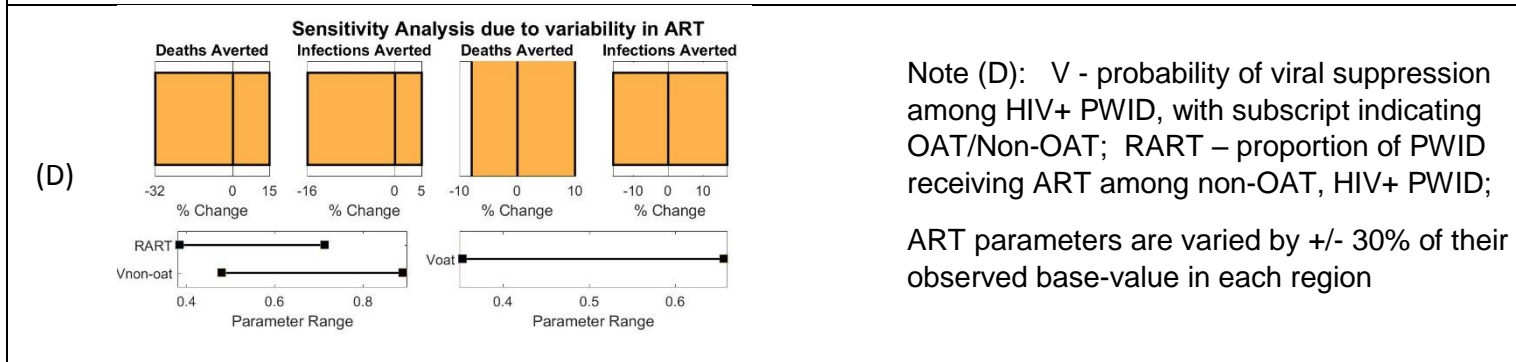

Note (D): V - probability of viral suppression among HIV+ PWID, with subscript indicating OAT/Non-OAT; RART – proportion of PWID receiving ART among non-OAT, HIV+ PWID;

ART parameters are varied by +/- 30% of their observed base-value in each region

Figure S10. Region: **Lviv**

Data and Model Projections Under Different OAT Scale-up Scenarios

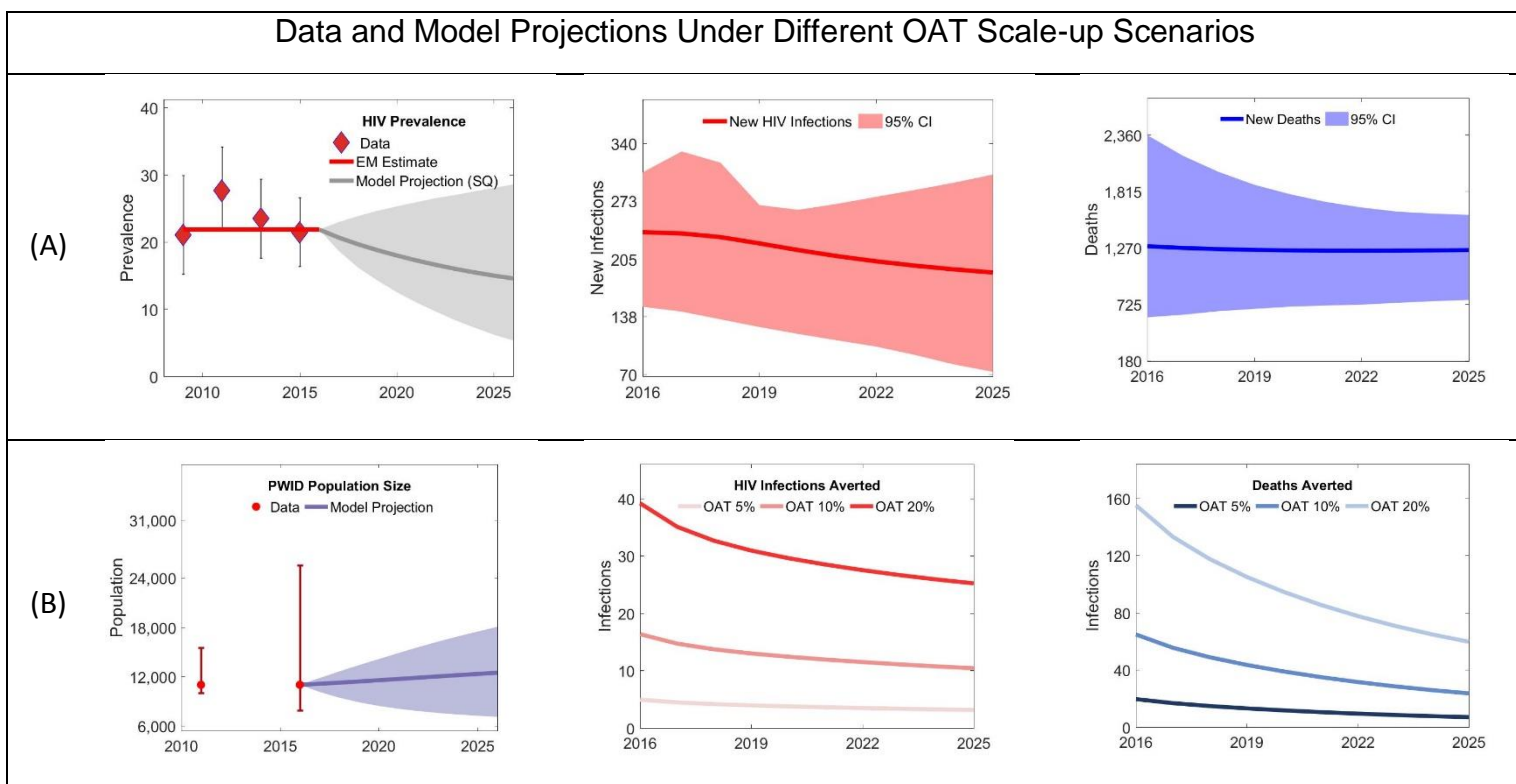

Footnote (A/B): In the projection of status quo, the line represents the mean; the shaded region - 95% confidence interval. EM stands for expectation maximization; (B) The circle represents point estimate for population size; error bar – max/min range.

Sensitivity Analysis: Population Size and ART

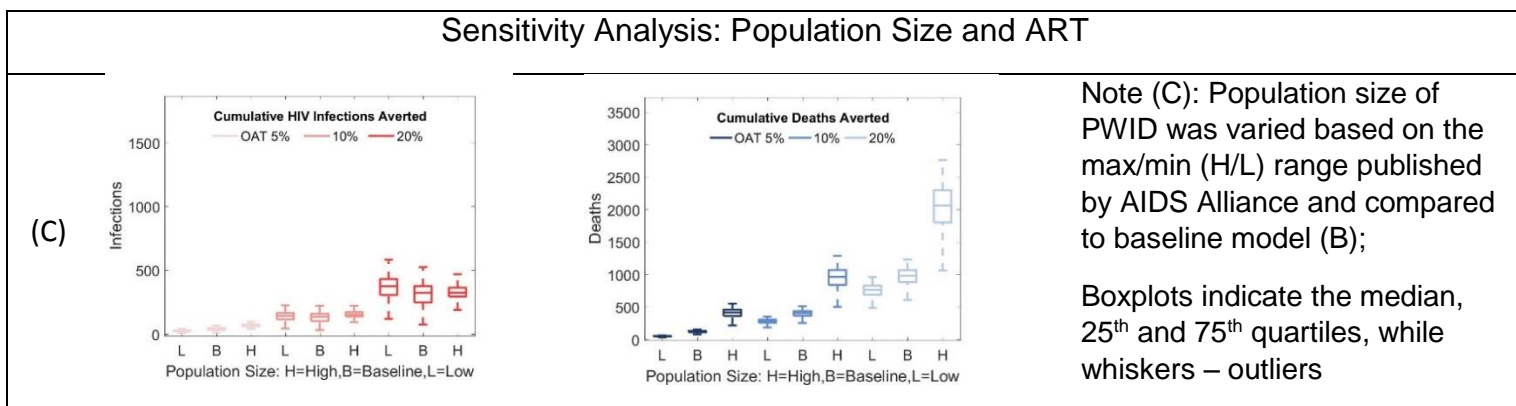

Note (C): Population size of PWID was varied based on the max/min (H/L) range published by AIDS Alliance and compared to baseline model (B);

Boxplots indicate the median, 25<sup>th</sup> and 75<sup>th</sup> quartiles, while whiskers – outliers

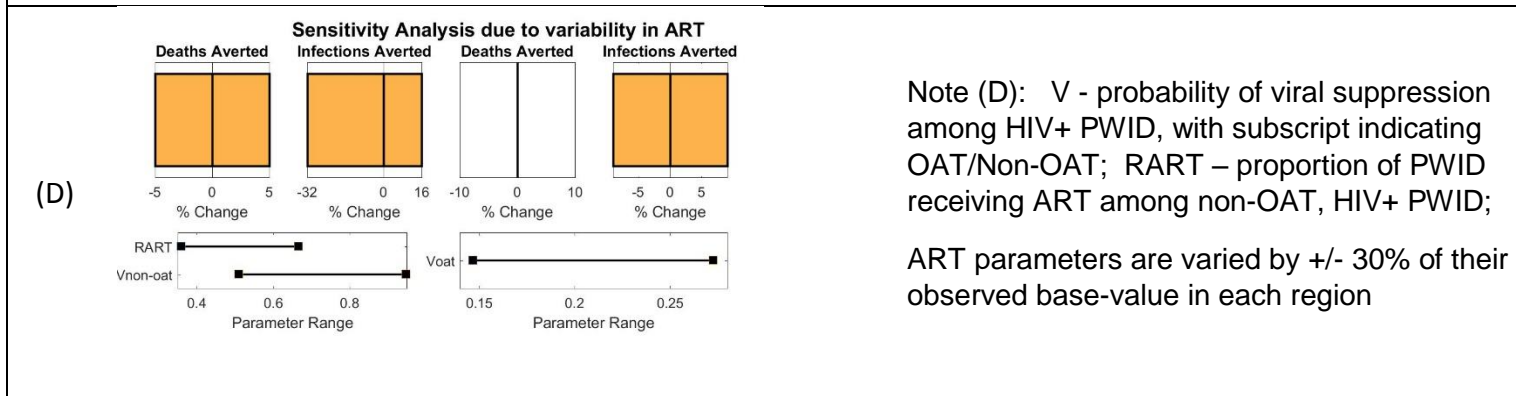

Note (D): V - probability of viral suppression among HIV+ PWID, with subscript indicating OAT/Non-OAT; RART – proportion of PWID receiving ART among non-OAT, HIV+ PWID;

ART parameters are varied by +/- 30% of their observed base-value in each region

Figure S11. Region: **Kherson**

Data and Model Projections Under Different OAT Scale-up Scenarios

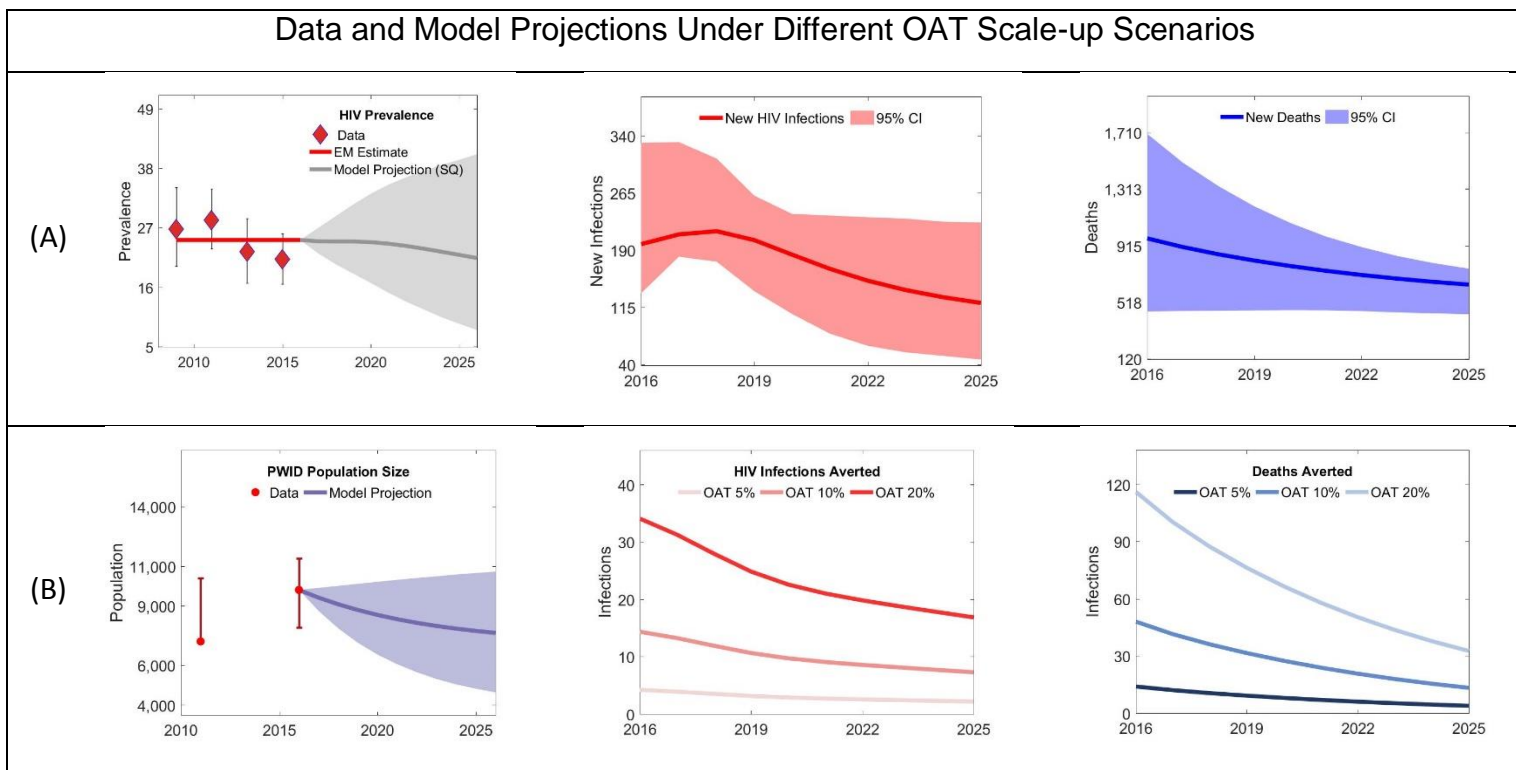

Footnote (A/B): In the projection of status quo, the line represents the mean; the shaded region - 95% confidence interval. EM stands for expectation maximization; (B) The circle represents point estimate for population size; error bar – max/min range.

Sensitivity Analysis: Population Size and ART

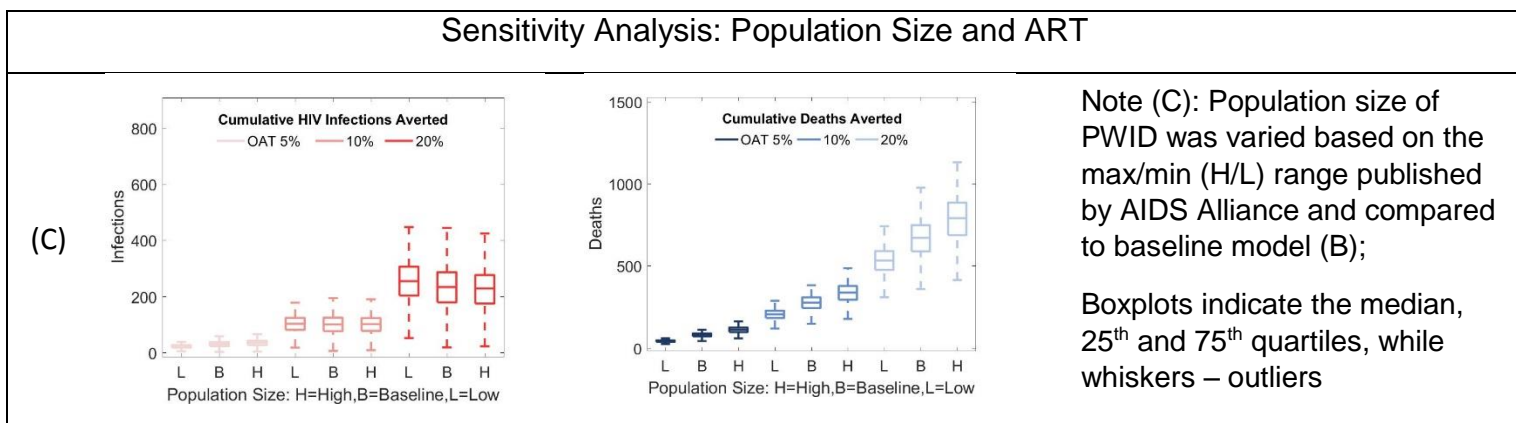

Note (C): Population size of PWID was varied based on the max/min (H/L) range published by AIDS Alliance and compared to baseline model (B);

Boxplots indicate the median, 25<sup>th</sup> and 75<sup>th</sup> quartiles, while whiskers – outliers

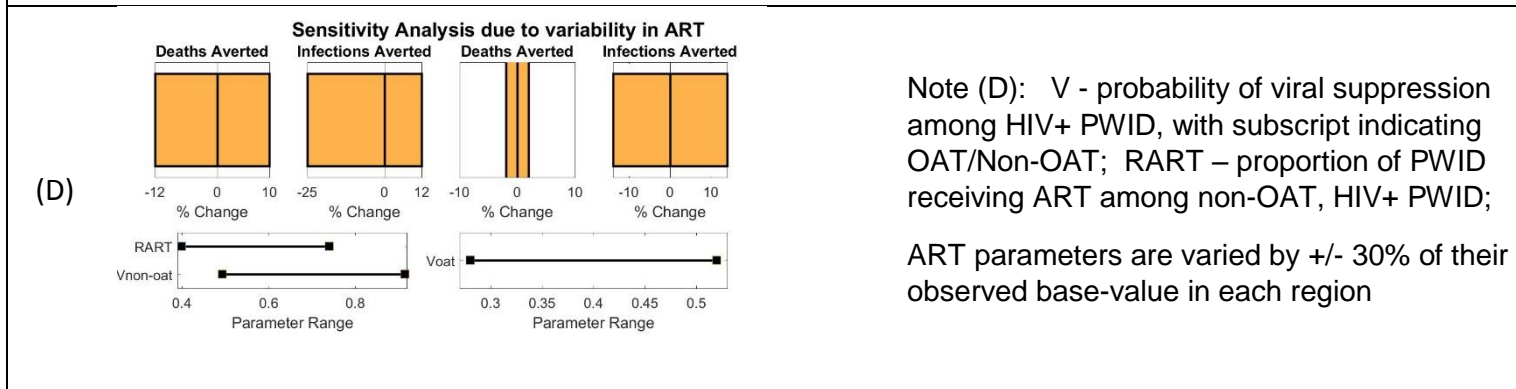

Note (D): V - probability of viral suppression among HIV+ PWID, with subscript indicating OAT/Non-OAT; RART – proportion of PWID receiving ART among non-OAT, HIV+ PWID;

ART parameters are varied by +/- 30% of their observed base-value in each region

Figure S12. Region: **Kirovohrad**

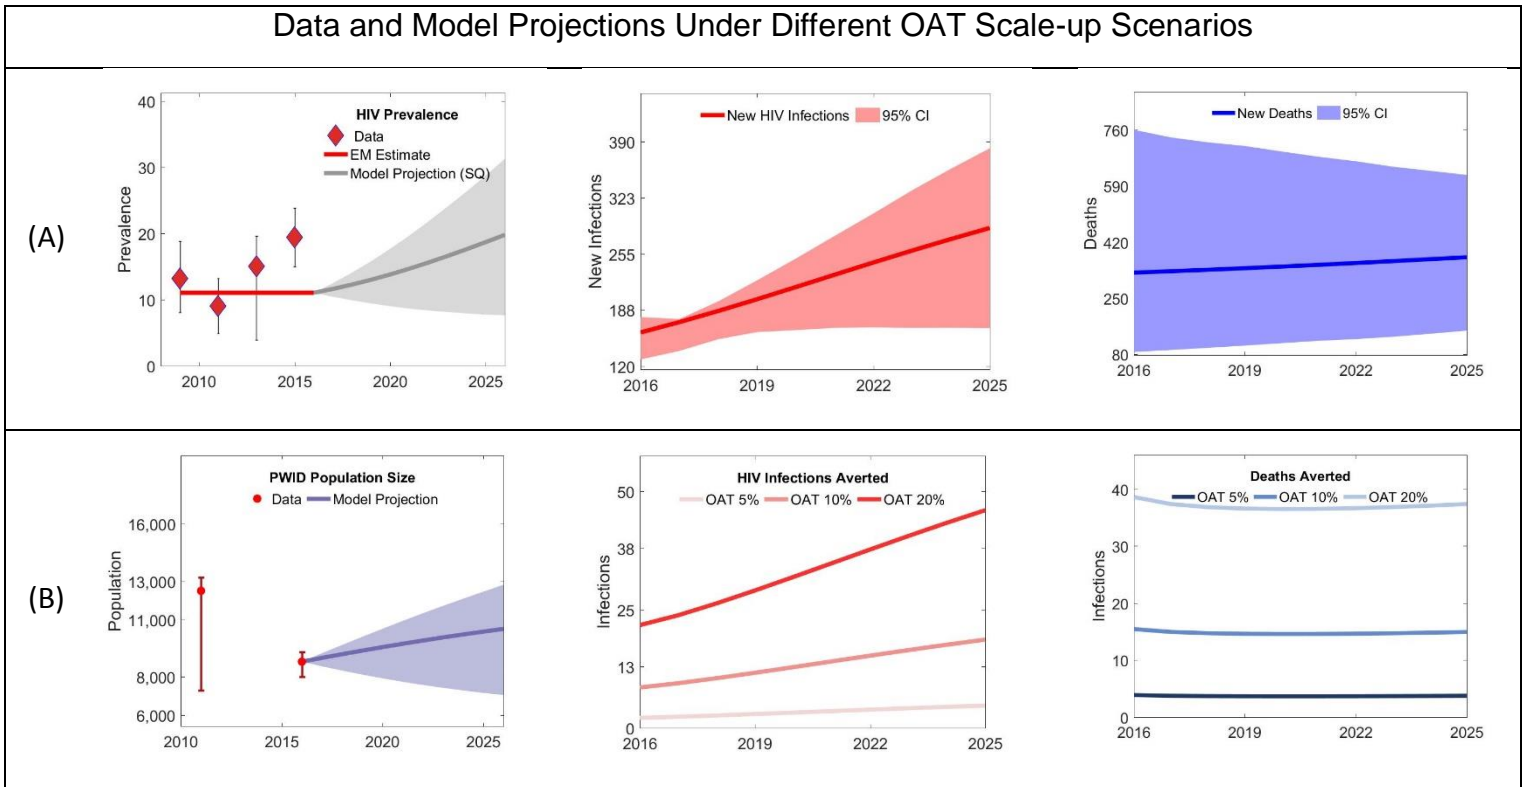

Footnote (A/B): In the projection of status quo, the line represents the mean; the shaded region - 95% confidence interval. EM stands for expectation maximization; (B) The circle represents point estimate for population size; error bar – max/min range.

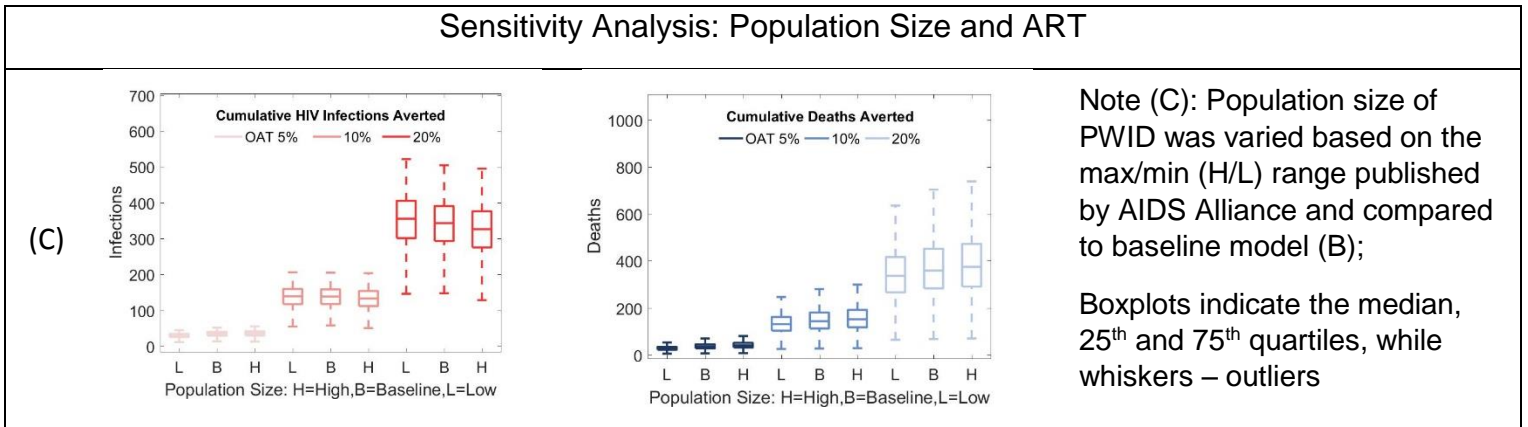

Note (C): Population size of PWID was varied based on the max/min (H/L) range published by AIDS Alliance and compared to baseline model (B);

Boxplots indicate the median, 25<sup>th</sup> and 75<sup>th</sup> quartiles, while whiskers – outliers

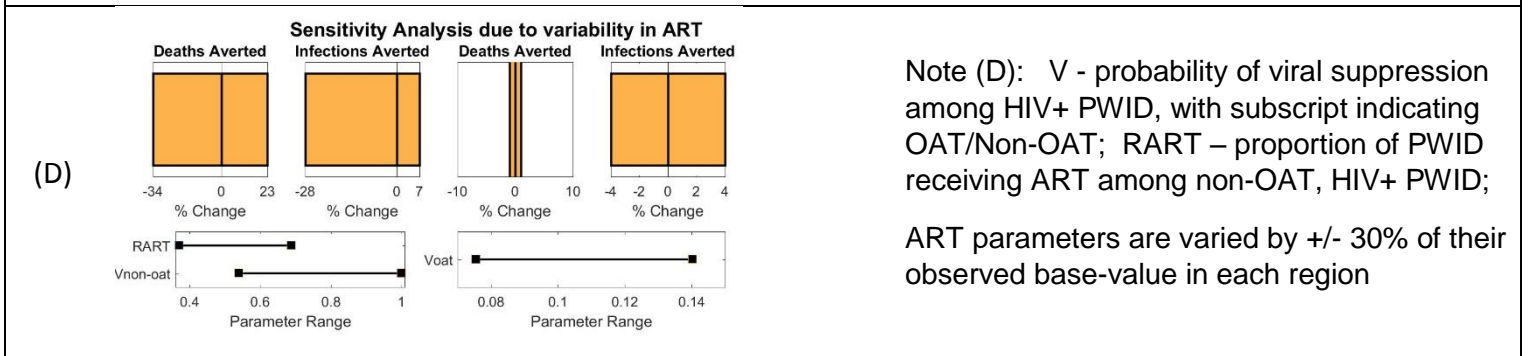

Note (D): V - probability of viral suppression among HIV+ PWID, with subscript indicating OAT/Non-OAT; RART – proportion of PWID receiving ART among non-OAT, HIV+ PWID;

ART parameters are varied by +/- 30% of their observed base-value in each region



Figure S13. Region: **Khmelnyskyi**

Data and Model Projections Under Different OAT Scale-up Scenarios

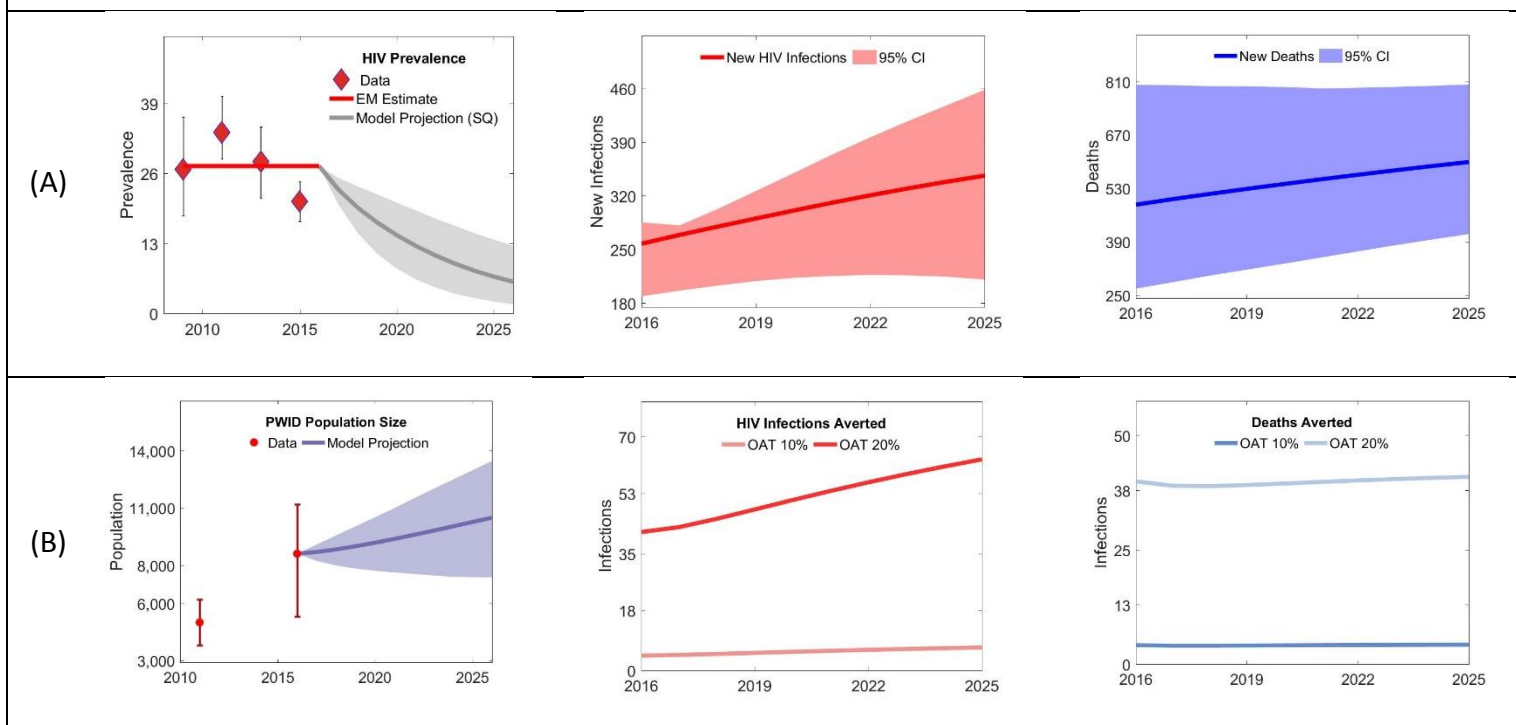

Footnote (A/B): In the projection of status quo, the line represents the mean; the shaded region - 95% confidence interval. EM stands for expectation maximization; (B) The circle represents point estimate for population size; error bar – max/min range.

Sensitivity Analysis: Population Size and ART

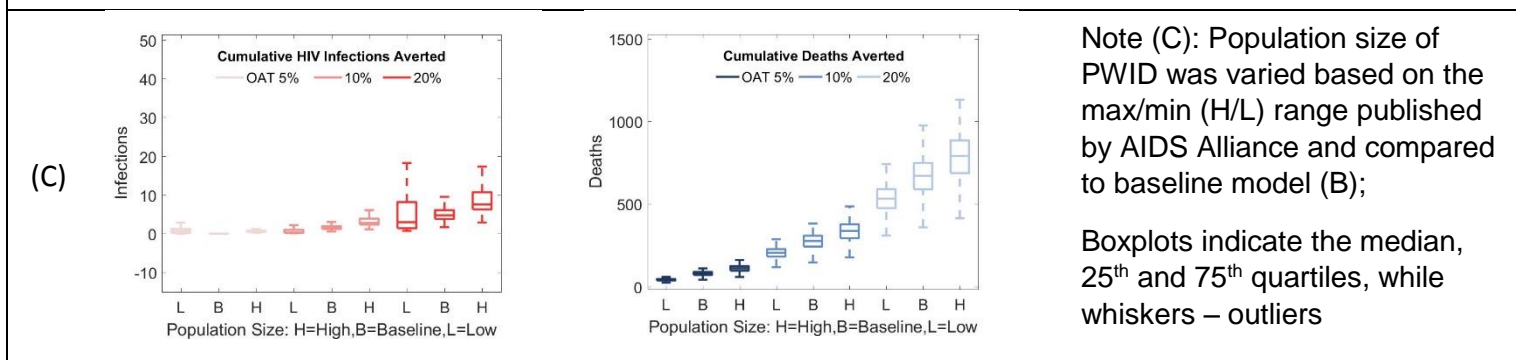

Note (C): Population size of PWID was varied based on the max/min (H/L) range published by AIDS Alliance and compared to baseline model (B);

Boxplots indicate the median, 25<sup>th</sup> and 75<sup>th</sup> quartiles, while whiskers – outliers

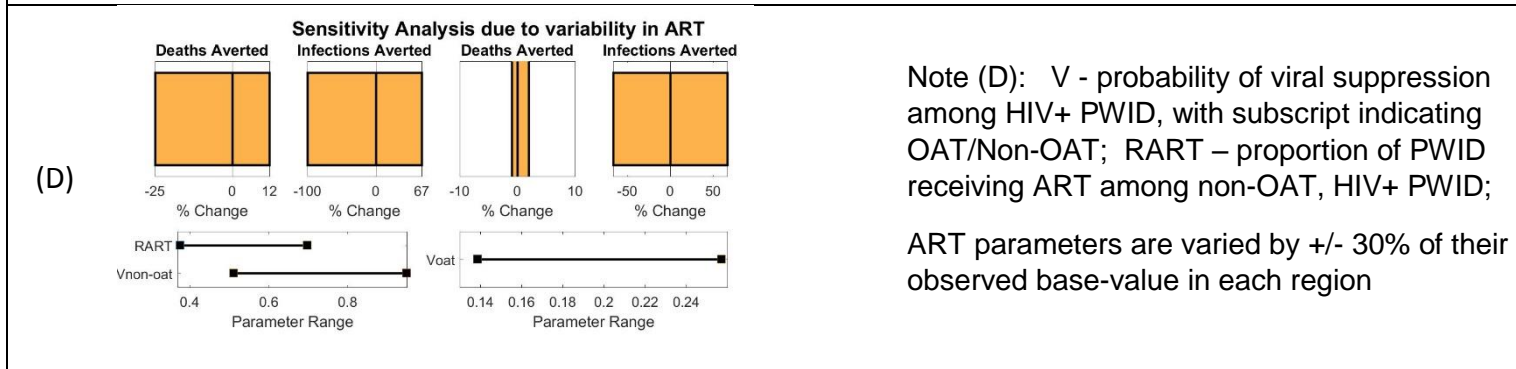

Note (D): V - probability of viral suppression among HIV+ PWID, with subscript indicating OAT/Non-OAT; RART – proportion of PWID receiving ART among non-OAT, HIV+ PWID;

ART parameters are varied by +/- 30% of their observed base-value in each region

Figure S14. Region: **Poltava**

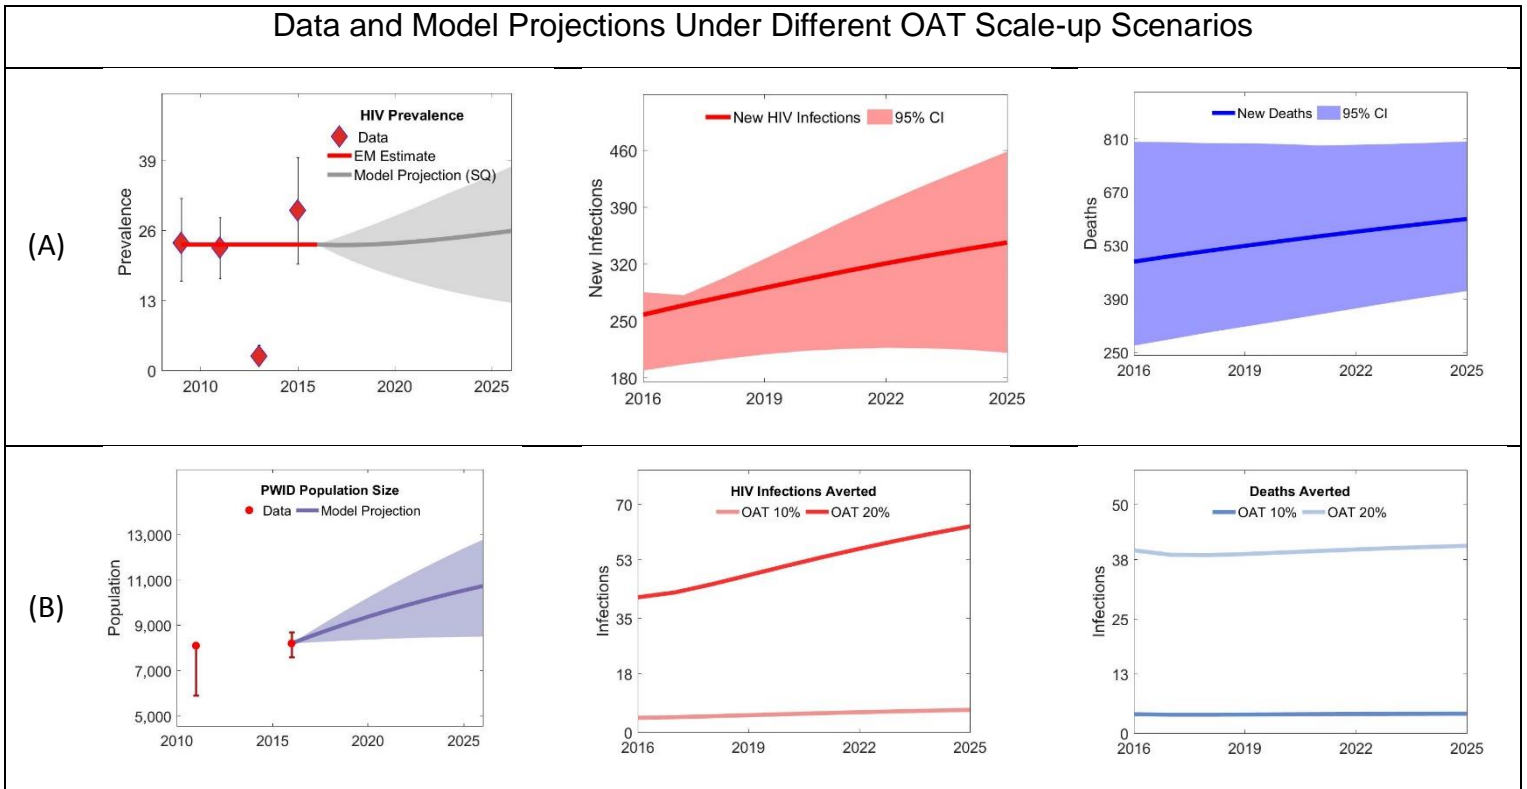

Footnote (A/B): In the projection of status quo, the line represents the mean; the shaded region - 95% confidence interval. EM stands for expectation maximization; (B) The circle represents point estimate for population size; error bar – max/min range.

### Sensitivity Analysis: Population Size and ART

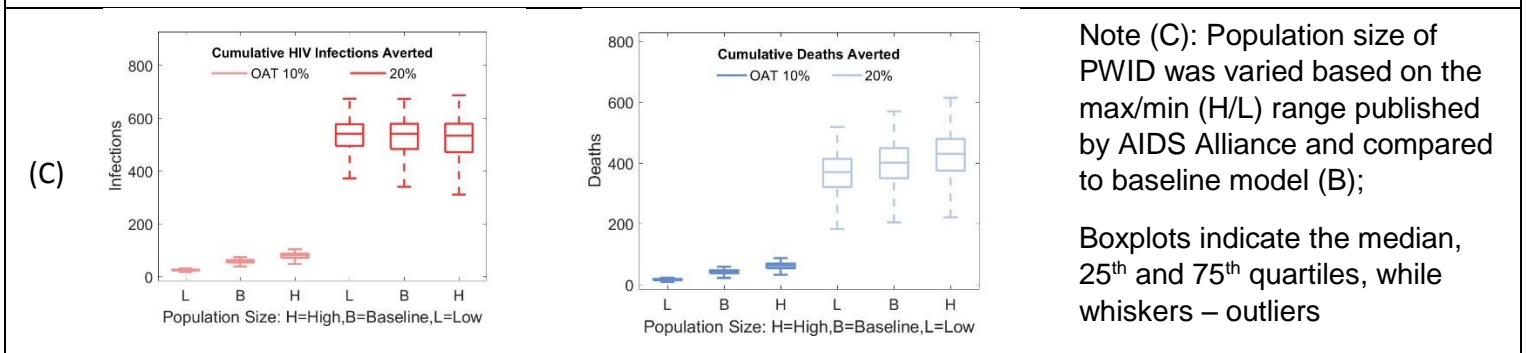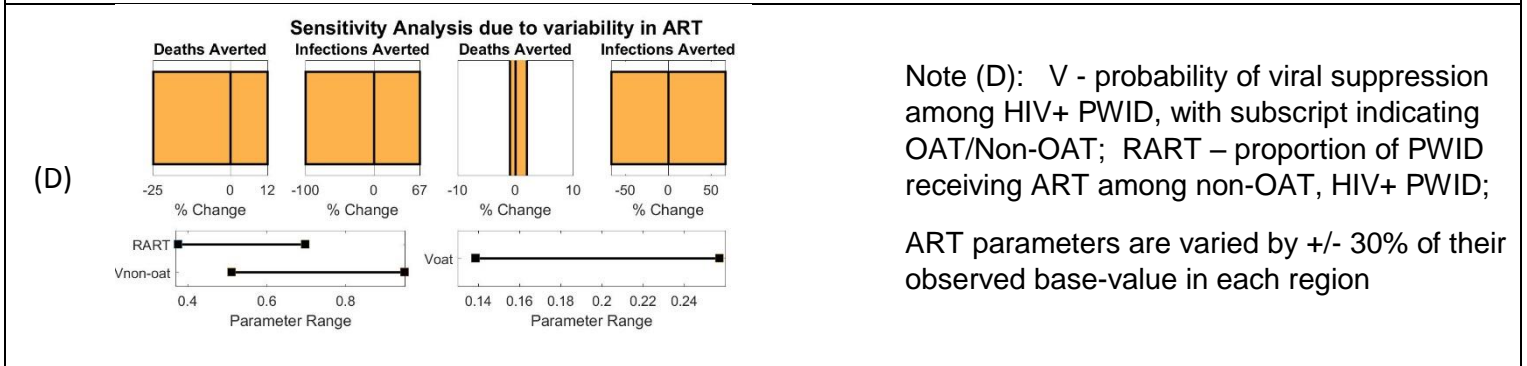

Figure S15. Region: **Kyiv Oblast**

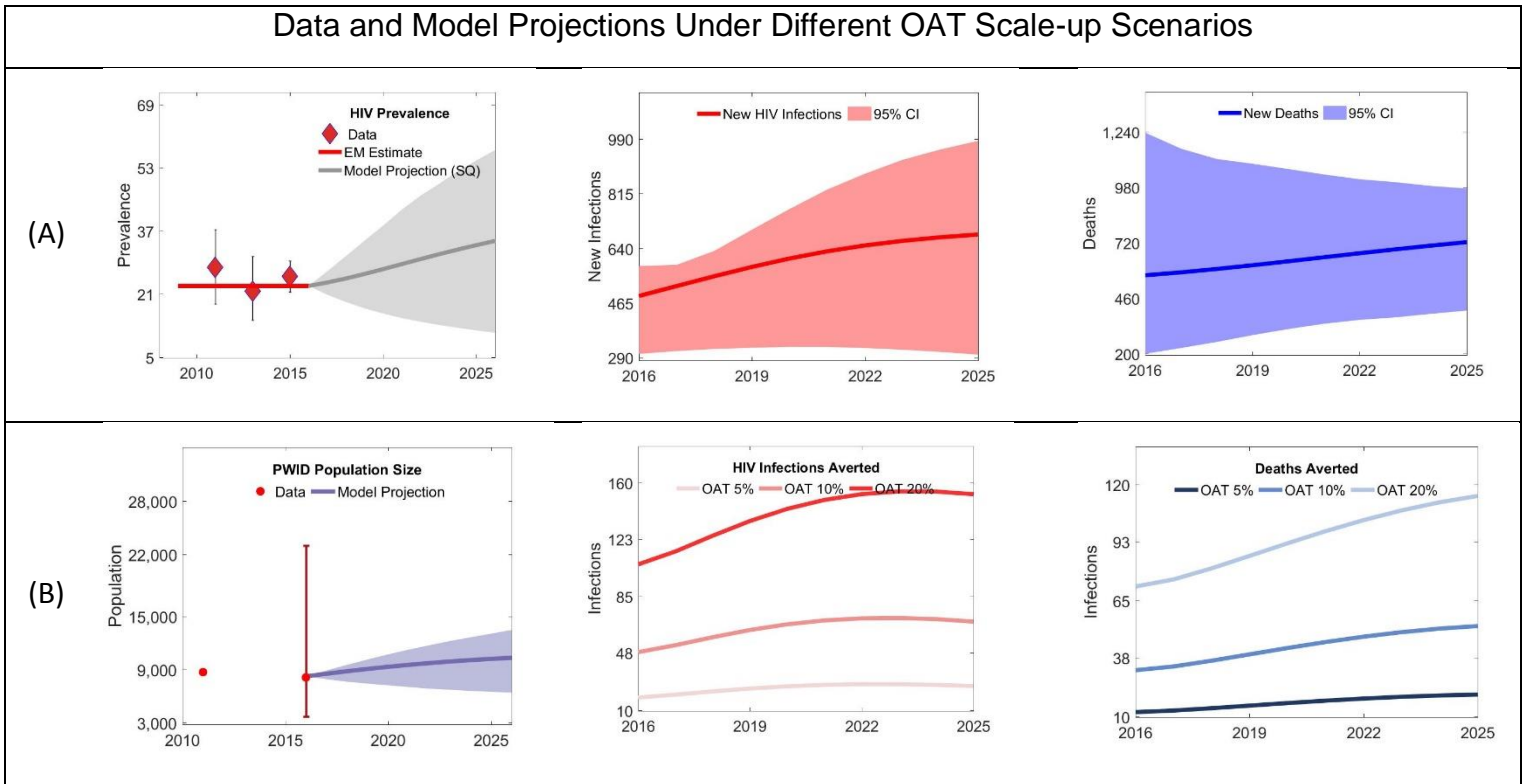

Footnote (A/B): In the projection of status quo, the line represents the mean; the shaded region - 95% confidence interval. EM stands for expectation maximization; (B) The circle represents point estimate for population size; error bar – max/min range.

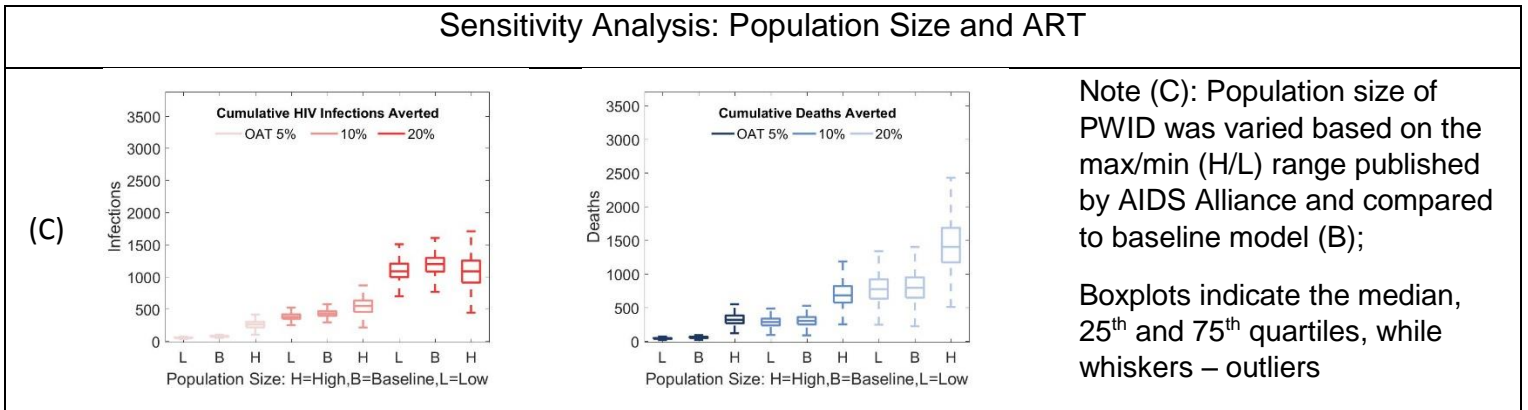

Note (C): Population size of PWID was varied based on the max/min (H/L) range published by AIDS Alliance and compared to baseline model (B);

Boxplots indicate the median, 25<sup>th</sup> and 75<sup>th</sup> quartiles, while whiskers – outliers

Note (D): V - probability of viral suppression among HIV+ PWID, with subscript indicating OAT/Non-OAT; RART – proportion of PWID receiving ART among non-OAT, HIV+ PWID;

ART parameters are varied by +/- 30% of their observed base-value in each region



Figure S16. Region: **Chernihiv**

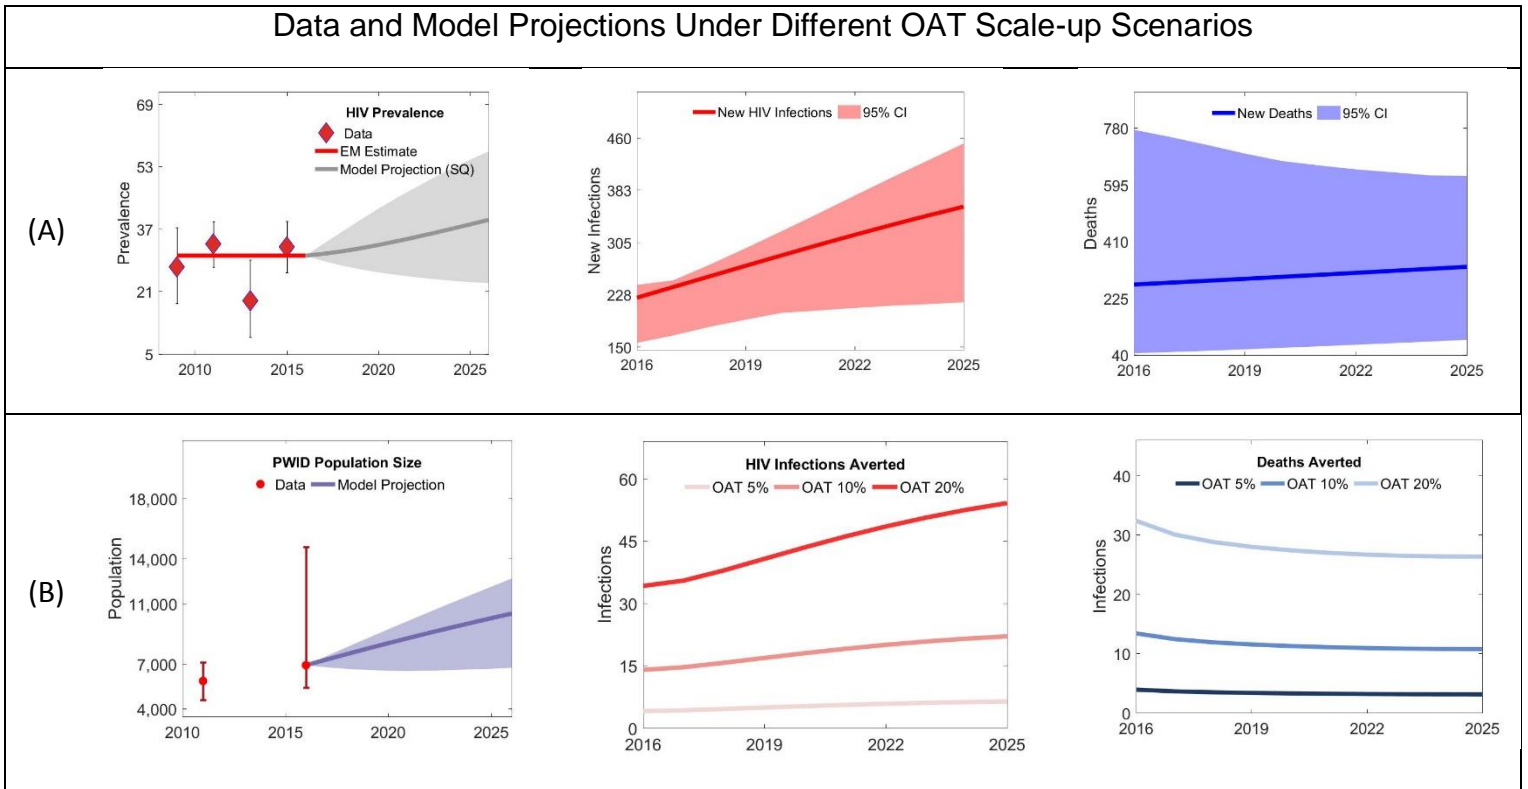

Footnote (A/B): In the projection of status quo, the line represents the mean; the shaded region - 95% confidence interval. EM stands for expectation maximization; (B) The circle represents point estimate for population size; error bar – max/min range.

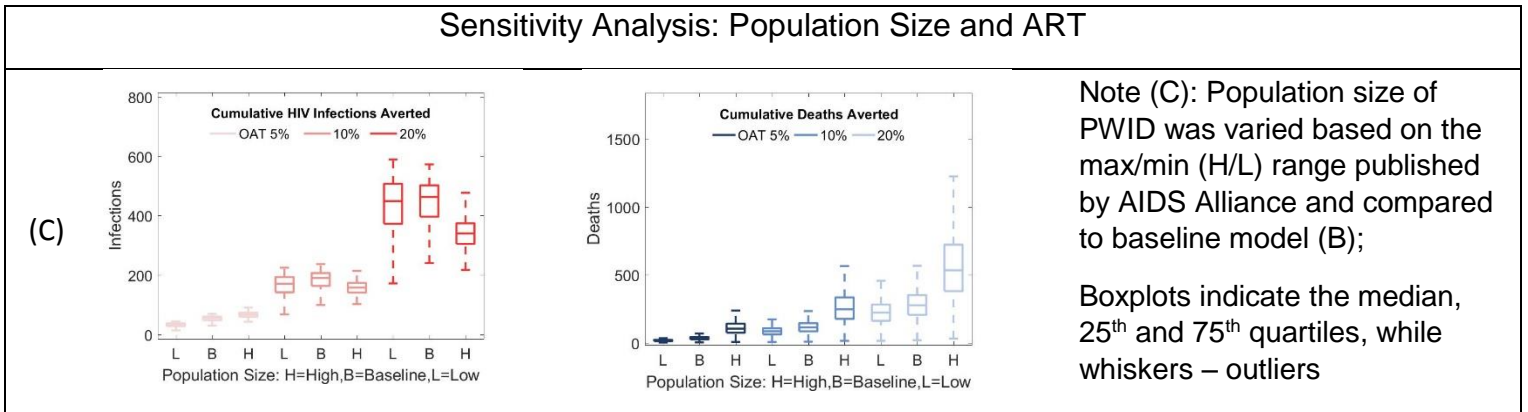

Note (C): Population size of PWID was varied based on the max/min (H/L) range published by AIDS Alliance and compared to baseline model (B);

Boxplots indicate the median, 25<sup>th</sup> and 75<sup>th</sup> quartiles, while whiskers – outliers

Note (D): V - probability of viral suppression among HIV+ PWID, with subscript indicating OAT/Non-OAT; RART – proportion of PWID receiving ART among non-OAT, HIV+ PWID;

ART parameters are varied by +/- 30% of their observed base-value in each region

Figure S17. Region: **Volyn**

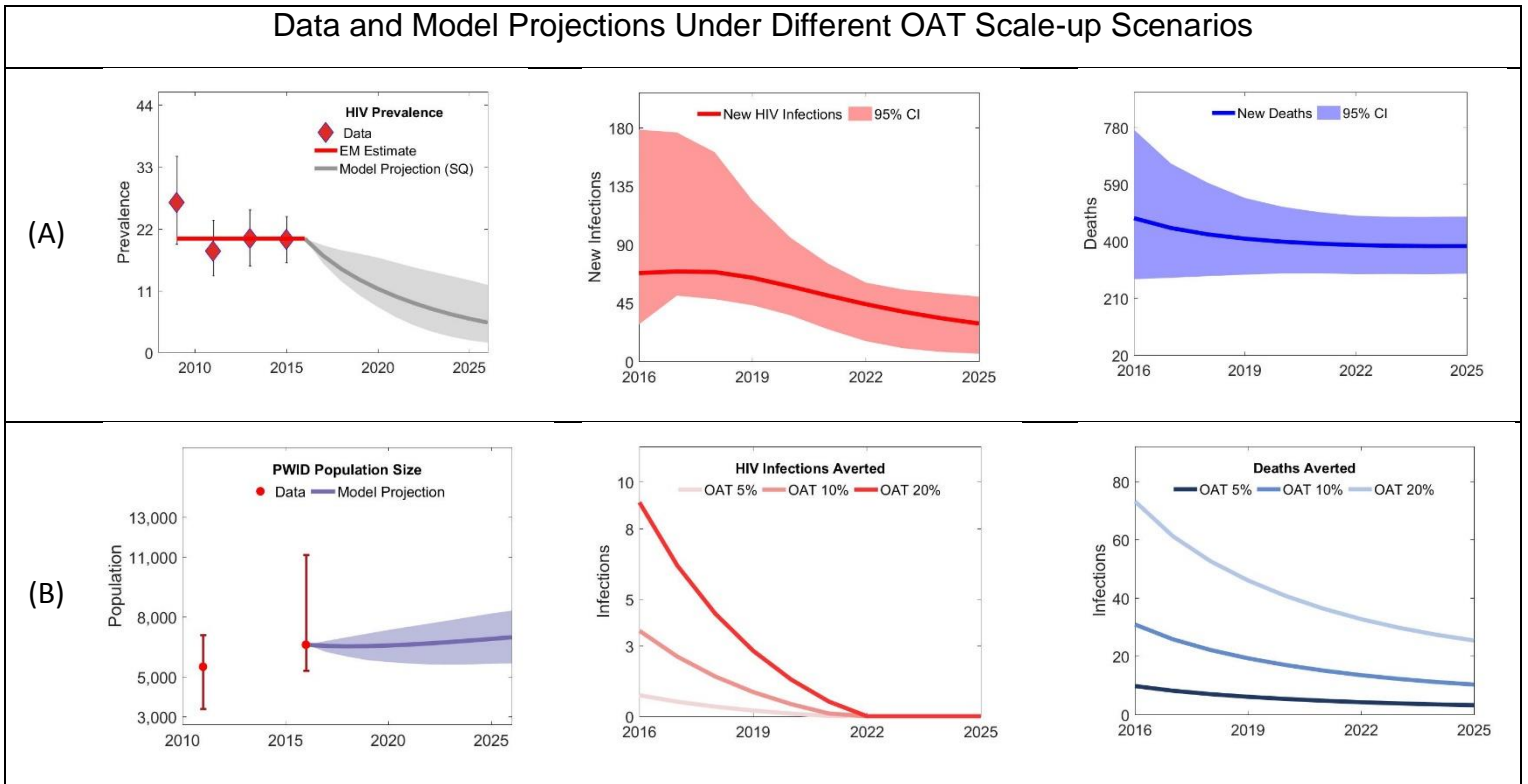

Footnote (A/B): In the projection of status quo, the line represents the mean; the shaded region - 95% confidence interval. EM stands for expectation maximization; (B) The circle represents point estimate for population size; error bar – max/min range.

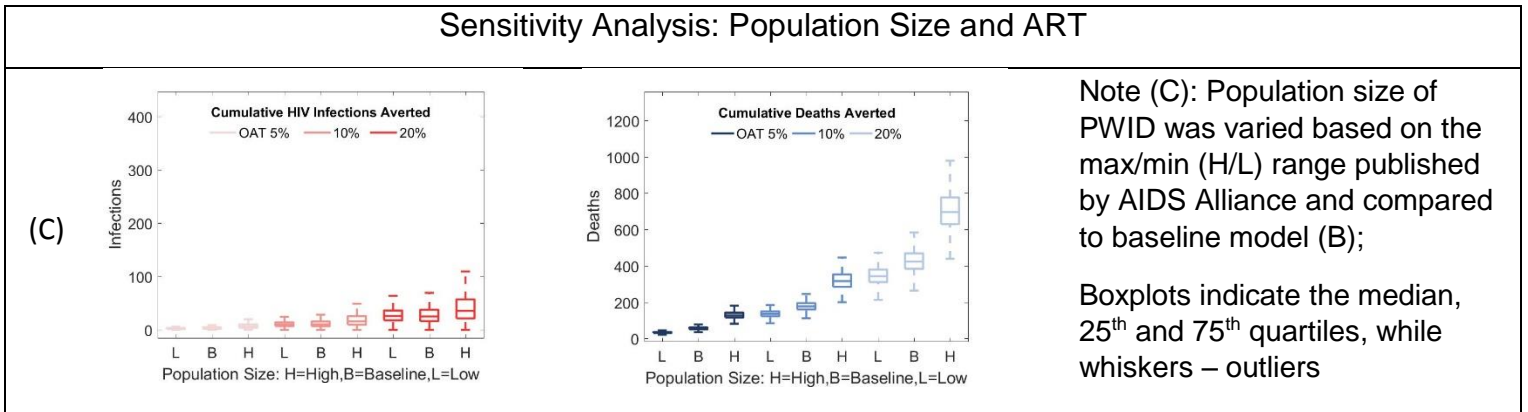

Note (C): Population size of PWID was varied based on the max/min (H/L) range published by AIDS Alliance and compared to baseline model (B);

Boxplots indicate the median, 25<sup>th</sup> and 75<sup>th</sup> quartiles, while whiskers – outliers

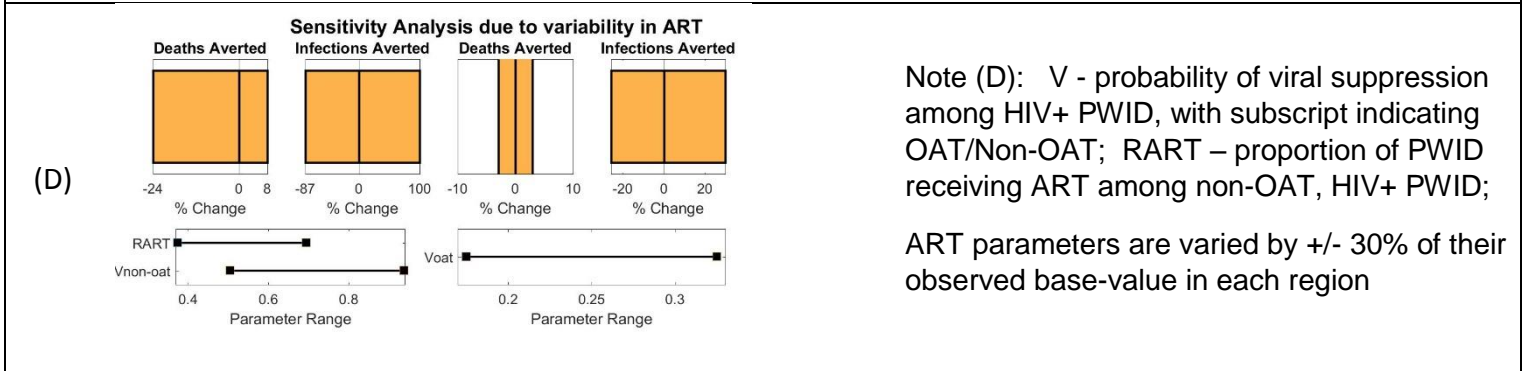

Note (D):  $V$  - probability of viral suppression among HIV+ PWID, with subscript indicating OAT/Non-OAT; RART – proportion of PWID receiving ART among non-OAT, HIV+ PWID;

ART parameters are varied by +/- 30% of their observed base-value in each region

Figure S18. Region: **Vinnitska**

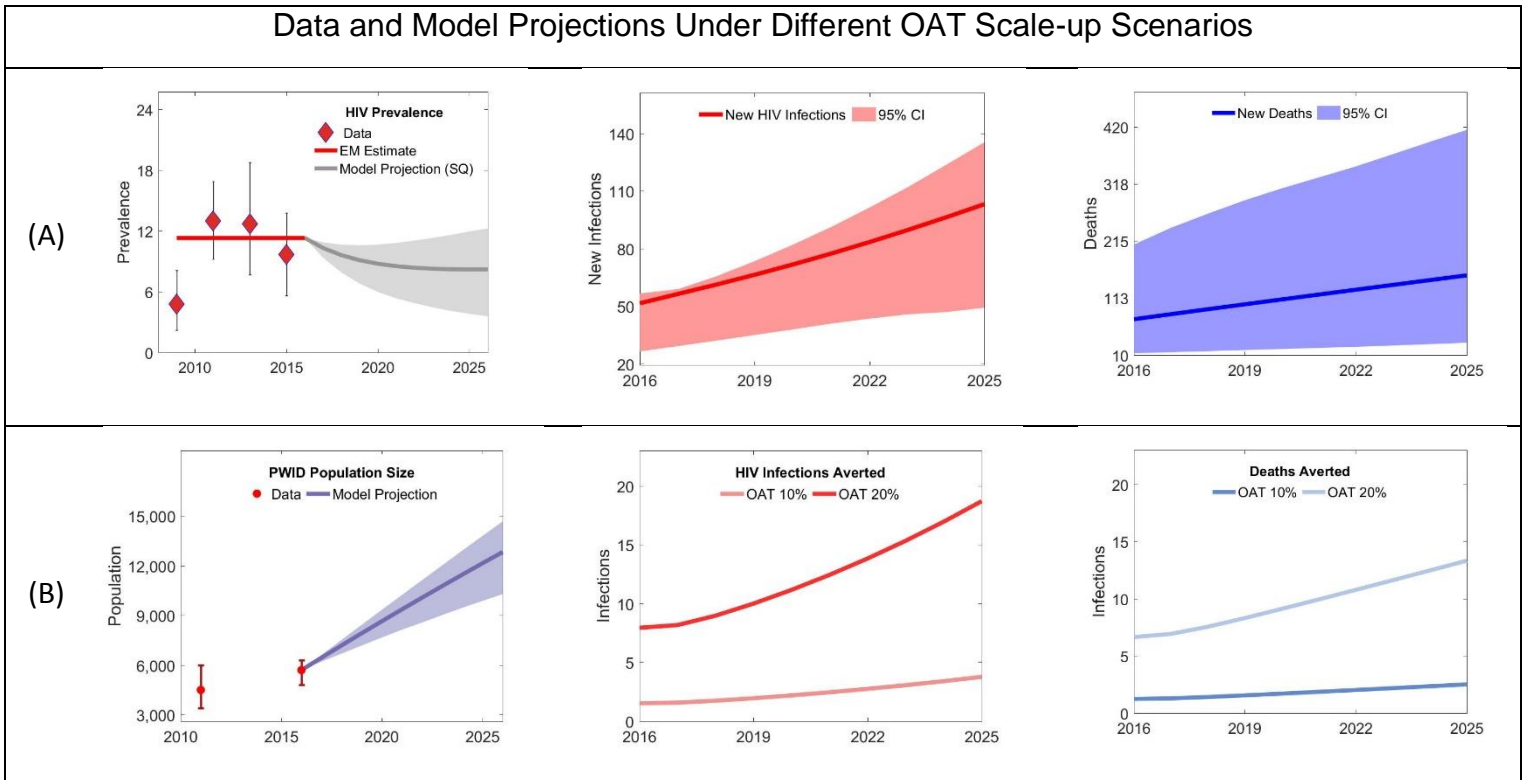

Footnote (A/B): In the projection of status quo, the line represents the mean; the shaded region - 95% confidence interval. EM stands for expectation maximization; (B) The circle represents point estimate for population size; error bar – max/min range.

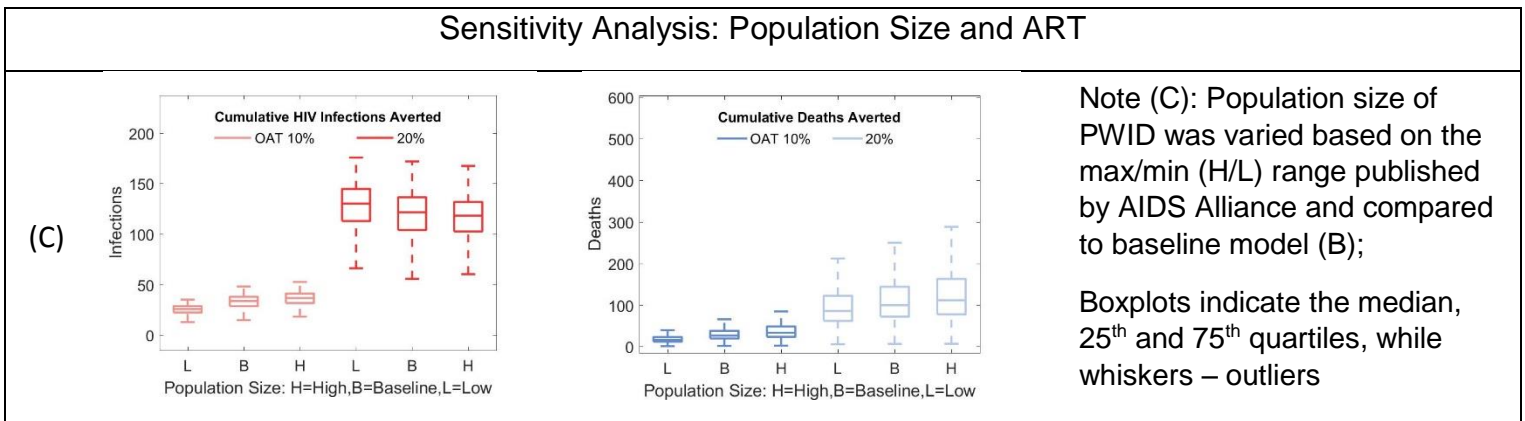

Note (C): Population size of PWID was varied based on the max/min (H/L) range published by AIDS Alliance and compared to baseline model (B);

Boxplots indicate the median, 25<sup>th</sup> and 75<sup>th</sup> quartiles, while whiskers – outliers

Note (D): V - probability of viral suppression among HIV+ PWID, with subscript indicating OAT/Non-OAT; RART – proportion of PWID receiving ART among non-OAT, HIV+ PWID;

ART parameters are varied by +/- 30% of their observed base-value in each region

Figure S19. Region: **Rivne**

Data and Model Projections Under Different OAT Scale-up Scenarios

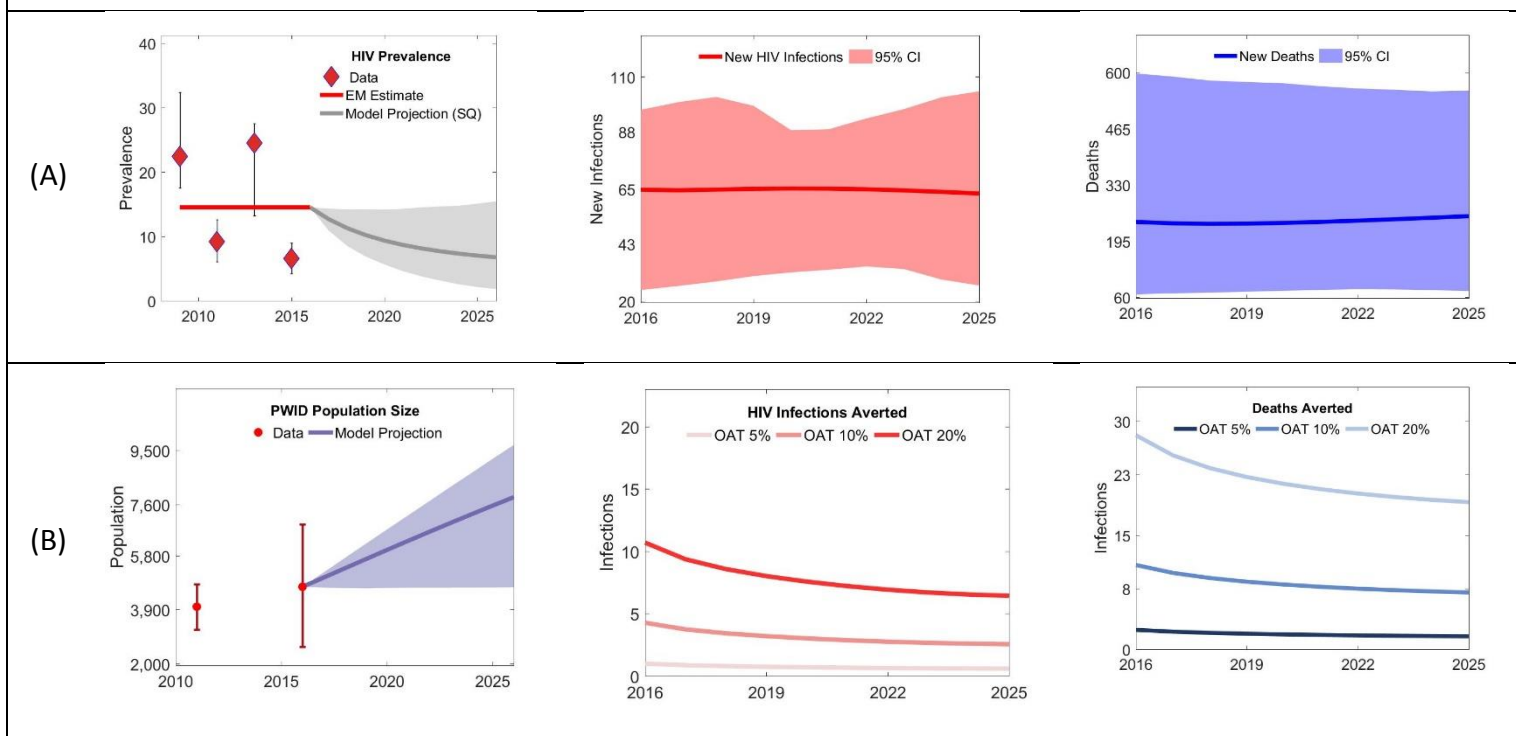

Footnote (A/B): In the projection of status quo, the line represents the mean; the shaded region - 95% confidence interval. EM stands for expectation maximization; (B) The circle represents point estimate for population size; error bar – max/min range.

Sensitivity Analysis: Population Size and ART

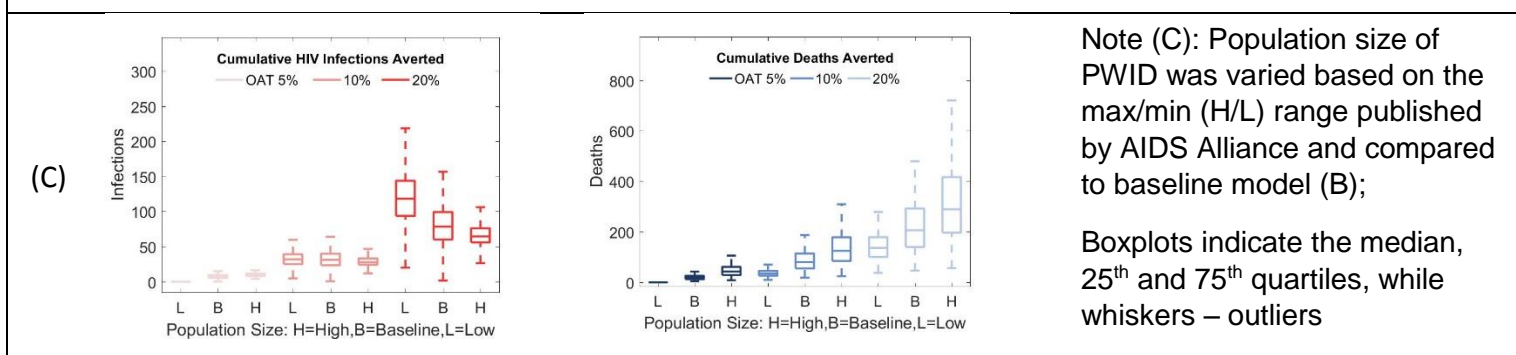

Note (C): Population size of PWID was varied based on the max/min (H/L) range published by AIDS Alliance and compared to baseline model (B);

Boxplots indicate the median, 25<sup>th</sup> and 75<sup>th</sup> quartiles, while whiskers – outliers

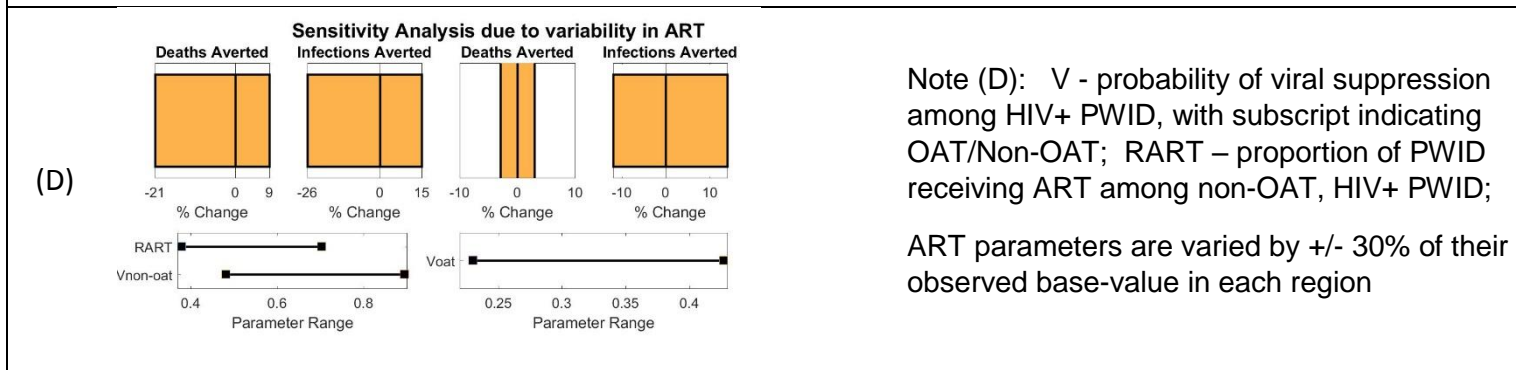

Note (D): V - probability of viral suppression among HIV+ PWID, with subscript indicating OAT/Non-OAT; RART – proportion of PWID receiving ART among non-OAT, HIV+ PWID;

ART parameters are varied by +/- 30% of their observed base-value in each region

Figure S20. Region: **Ternopil**

Data and Model Projections Under Different OAT Scale-up Scenarios

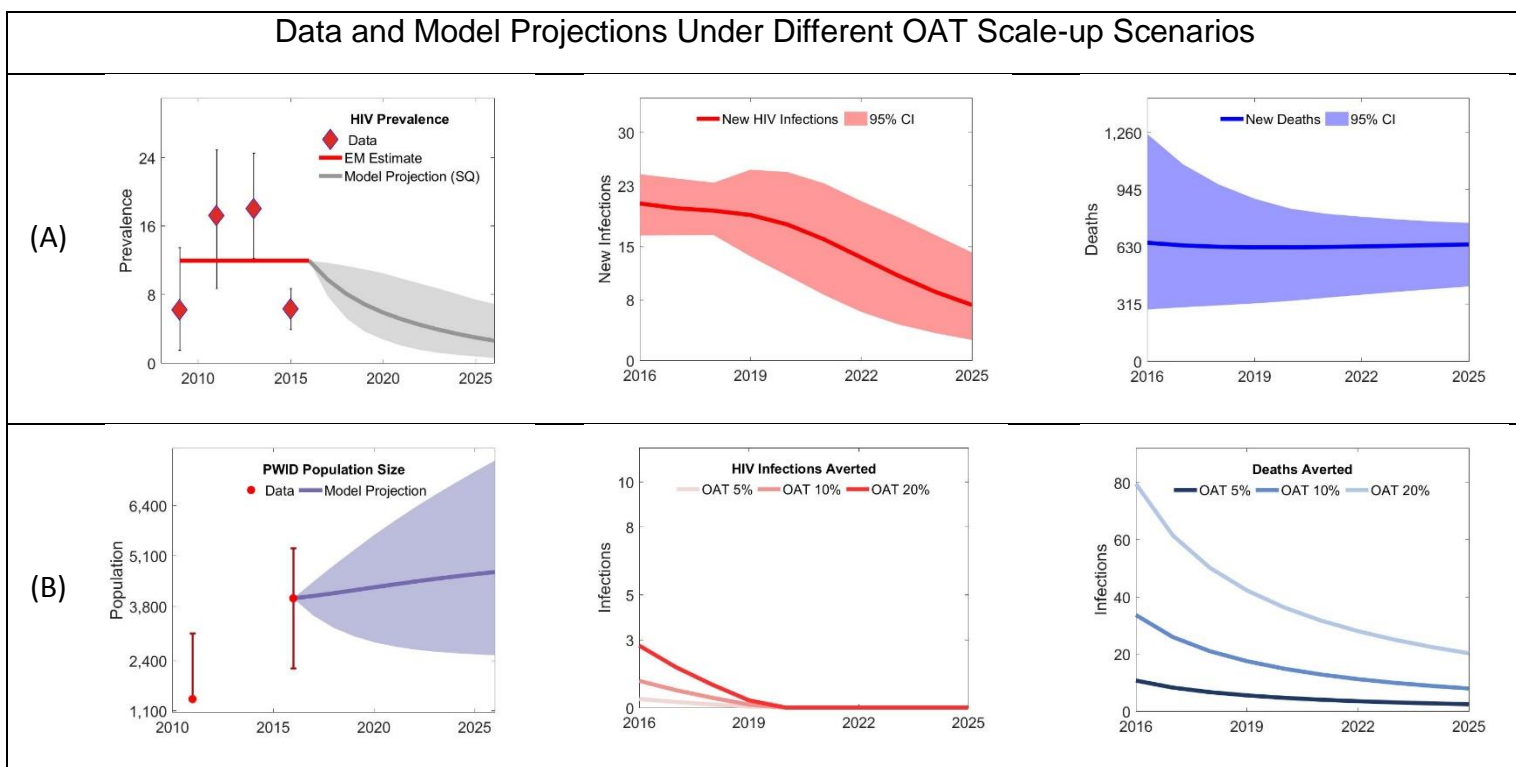

Footnote (A/B): In the projection of status quo, the line represents the mean; the shaded region - 95% confidence interval. EM stands for expectation maximization; (B) The circle represents point estimate for population size; error bar – max/min range.

Sensitivity Analysis: Population Size and ART

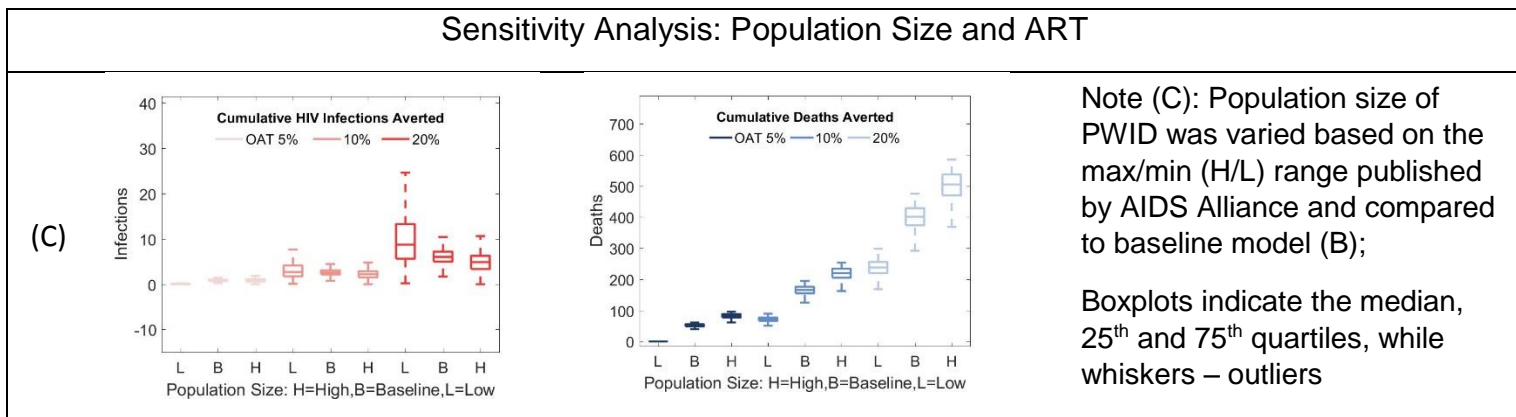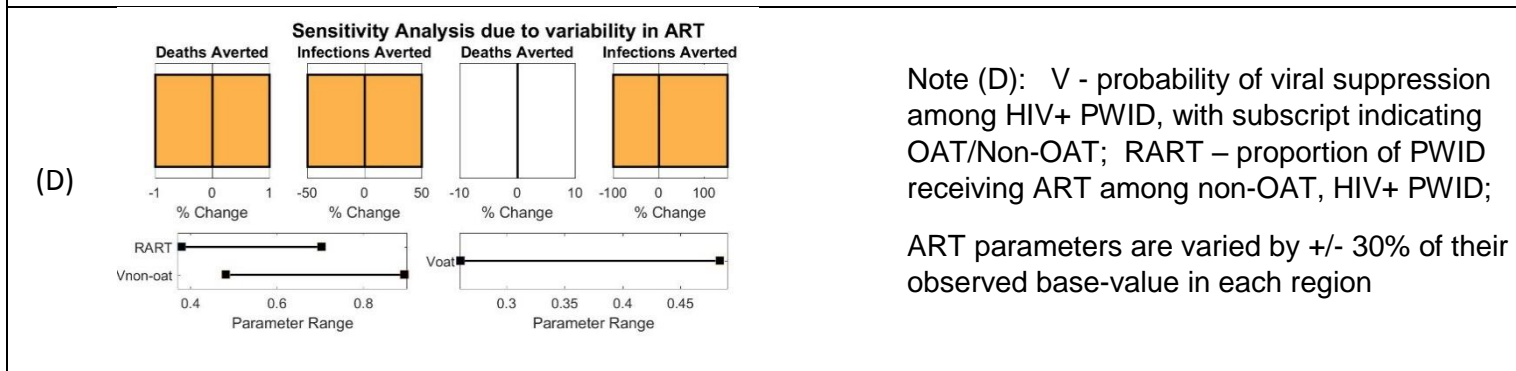

Note (D): V - probability of viral suppression among HIV+ PWID, with subscript indicating OAT/Non-OAT; RART – proportion of PWID receiving ART among non-OAT, HIV+ PWID;

ART parameters are varied by +/- 30% of their observed base-value in each region



Figure S21. Region: **Ivano-Frankivsk**

Data and Model Projections Under Different OAT Scale-up Scenarios

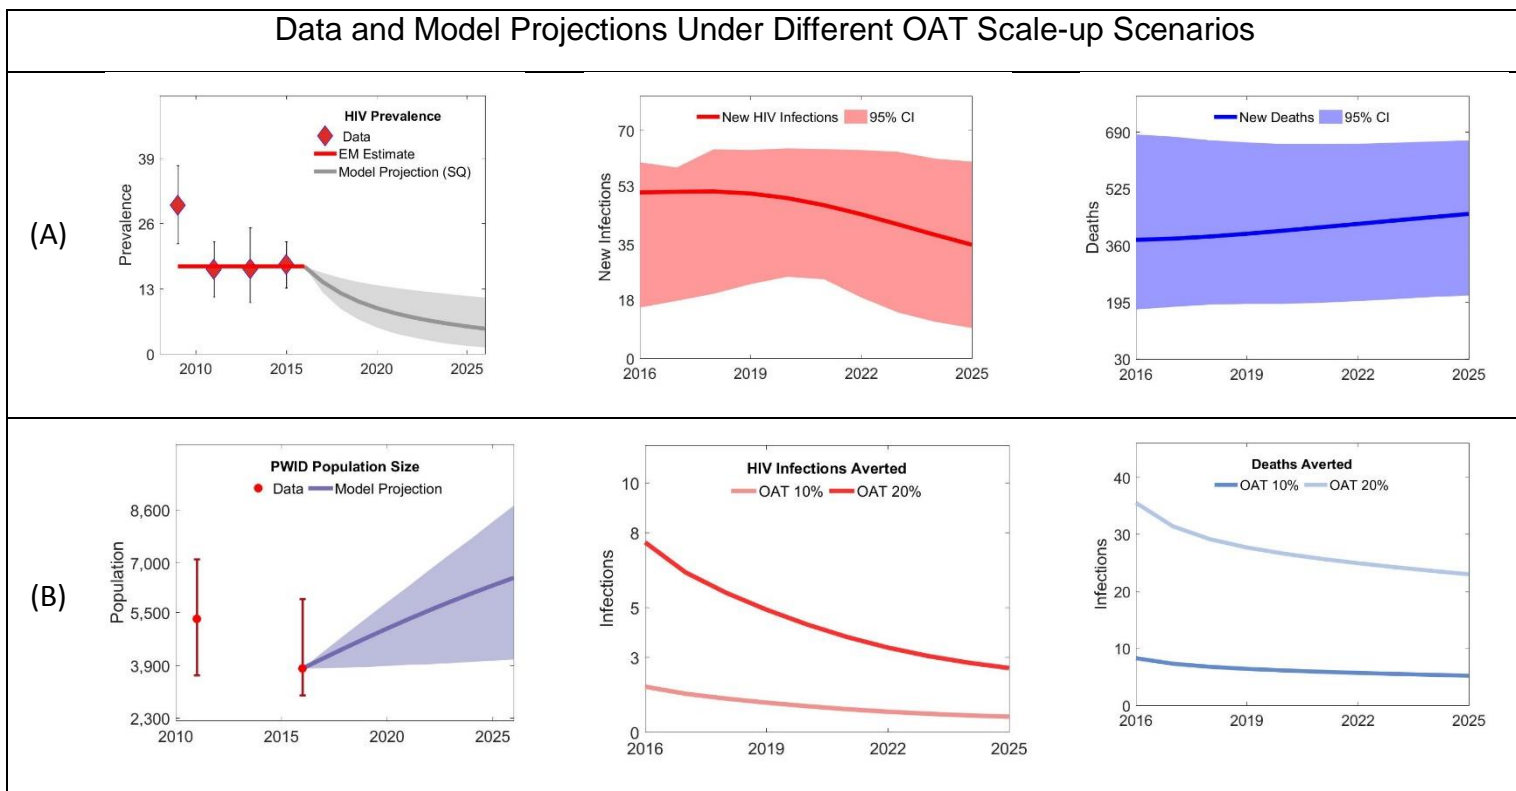

Footnote (A/B): In the projection of status quo, the line represents the mean; the shaded region - 95% confidence interval. EM stands for expectation maximization; (B) The circle represents point estimate for population size; error bar – max/min range.

Sensitivity Analysis: Population Size and ART

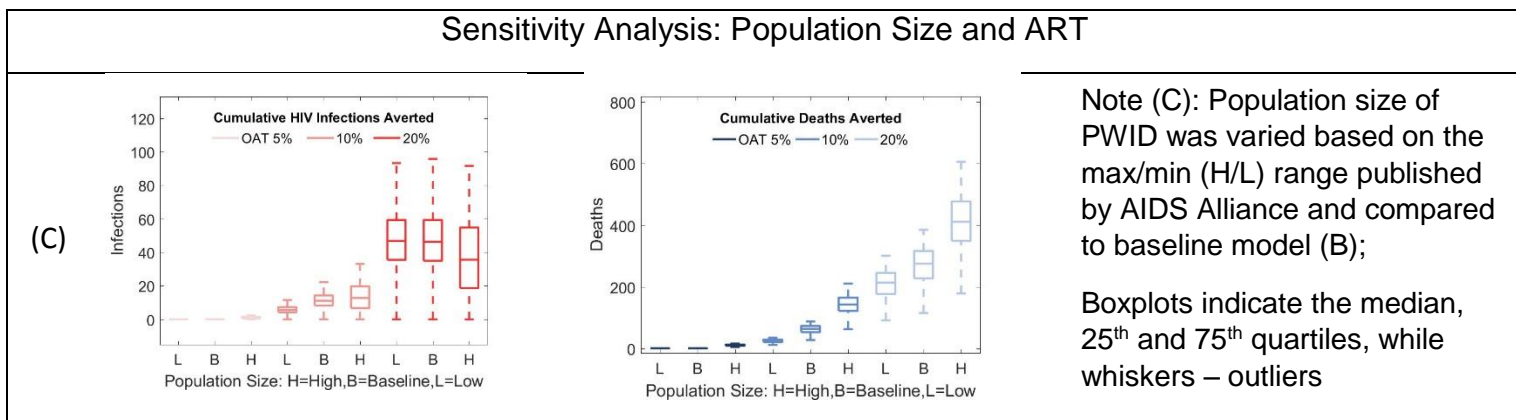

Note (C): Population size of PWID was varied based on the max/min (H/L) range published by AIDS Alliance and compared to baseline model (B);

Boxplots indicate the median, 25<sup>th</sup> and 75<sup>th</sup> quartiles, while whiskers – outliers

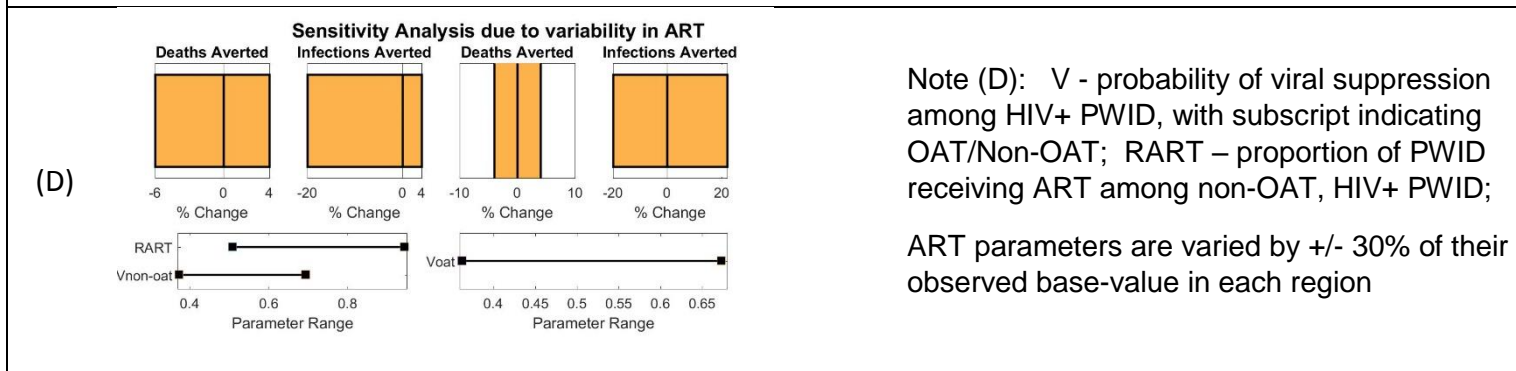

Note (D): V - probability of viral suppression among HIV+ PWID, with subscript indicating OAT/Non-OAT; RART – proportion of PWID receiving ART among non-OAT, HIV+ PWID;

ART parameters are varied by +/- 30% of their observed base-value in each region

Figure S22. Region: **Chernivtsi**

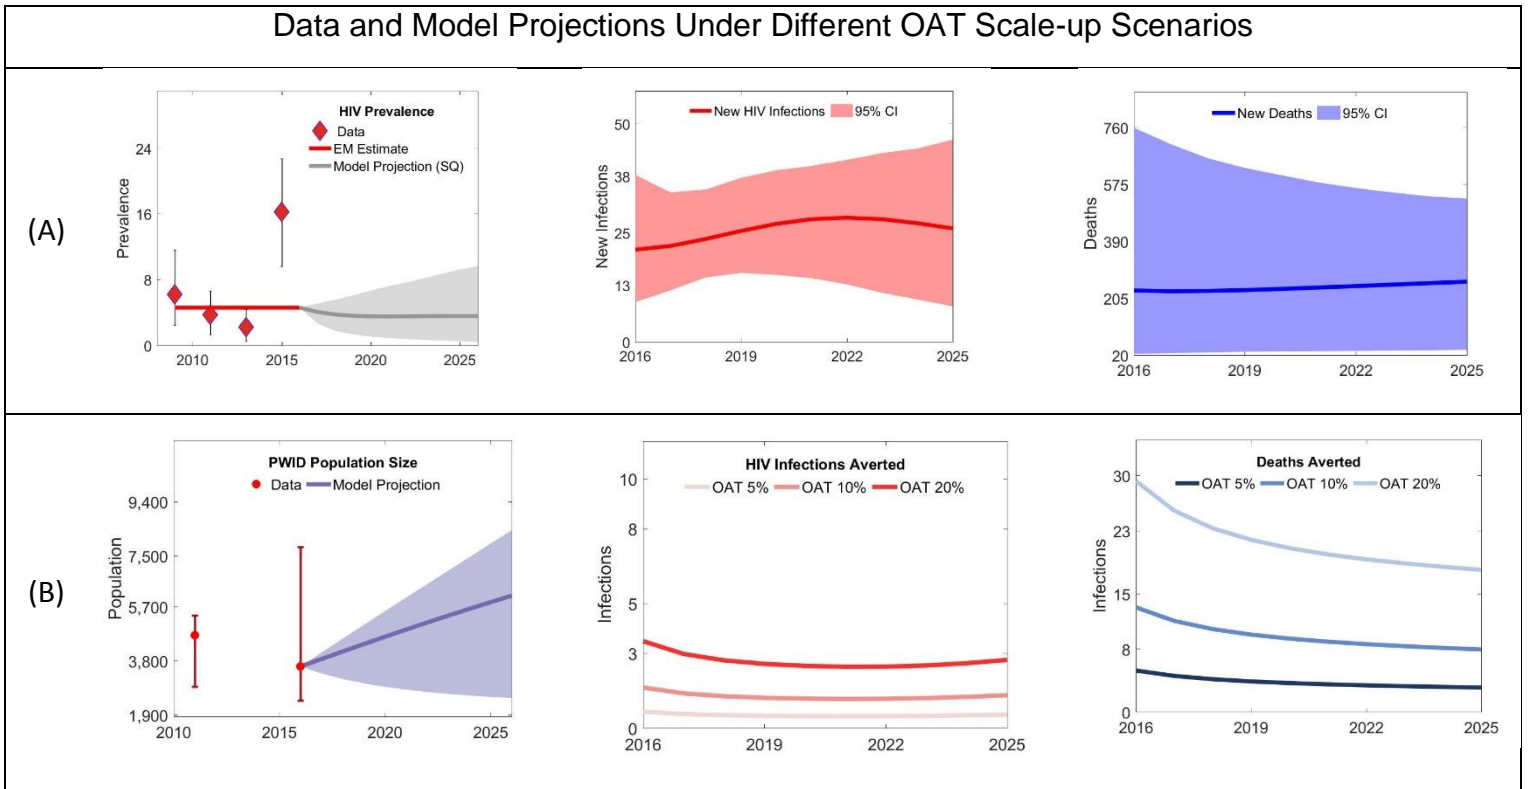

Footnote (A/B): In the projection of status quo, the line represents the mean; the shaded region - 95% confidence interval. EM stands for expectation maximization; (B) The circle represents point estimate for population size; error bar – max/min range.

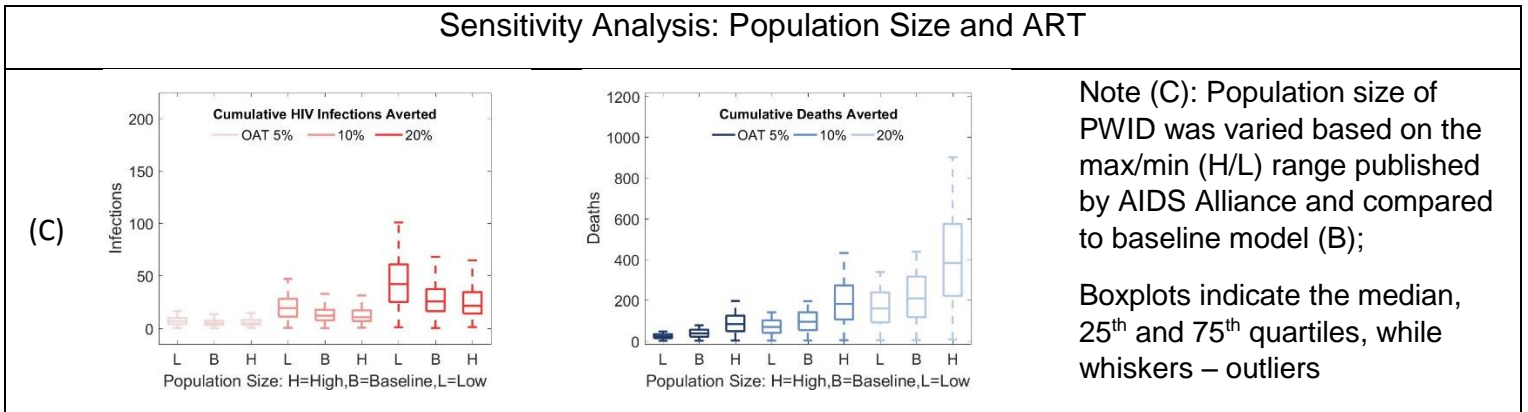

Note (C): Population size of PWID was varied based on the max/min (H/L) range published by AIDS Alliance and compared to baseline model (B);

Boxplots indicate the median, 25<sup>th</sup> and 75<sup>th</sup> quartiles, while whiskers – outliers

Note (D): V - probability of viral suppression among HIV+ PWID, with subscript indicating OAT/Non-OAT; RART – proportion of PWID receiving ART among non-OAT, HIV+ PWID;

ART parameters are varied by +/- 30% of their observed base-value in each region

Figure S23. Region: **Zhytomir**

Data and Model Projections Under Different OAT Scale-up Scenarios

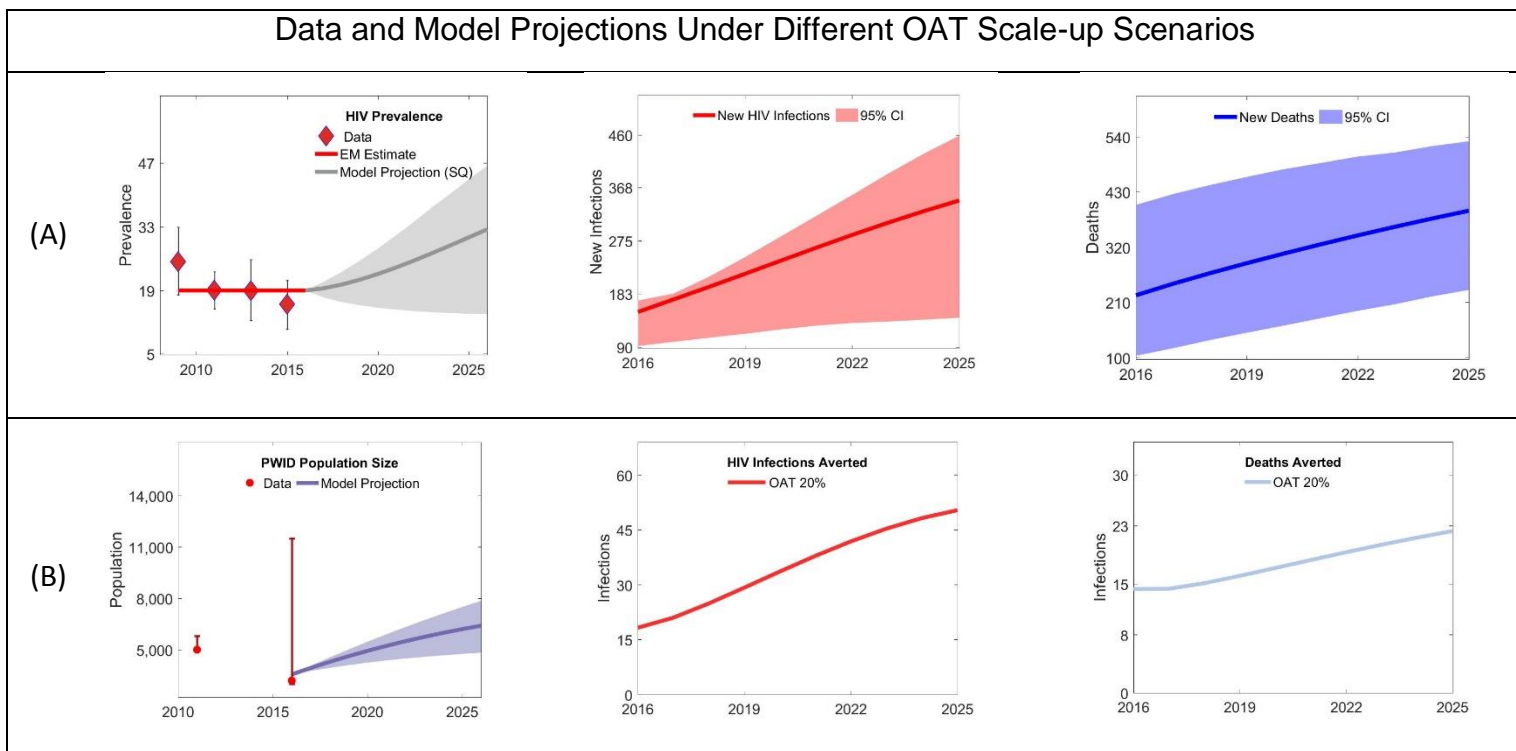

Footnote (A/B): In the projection of status quo, the line represents the mean; the shaded region - 95% confidence interval. EM stands for expectation maximization; (B) The circle represents point estimate for population size; error bar – max/min range.

Sensitivity Analysis: Population Size and ART

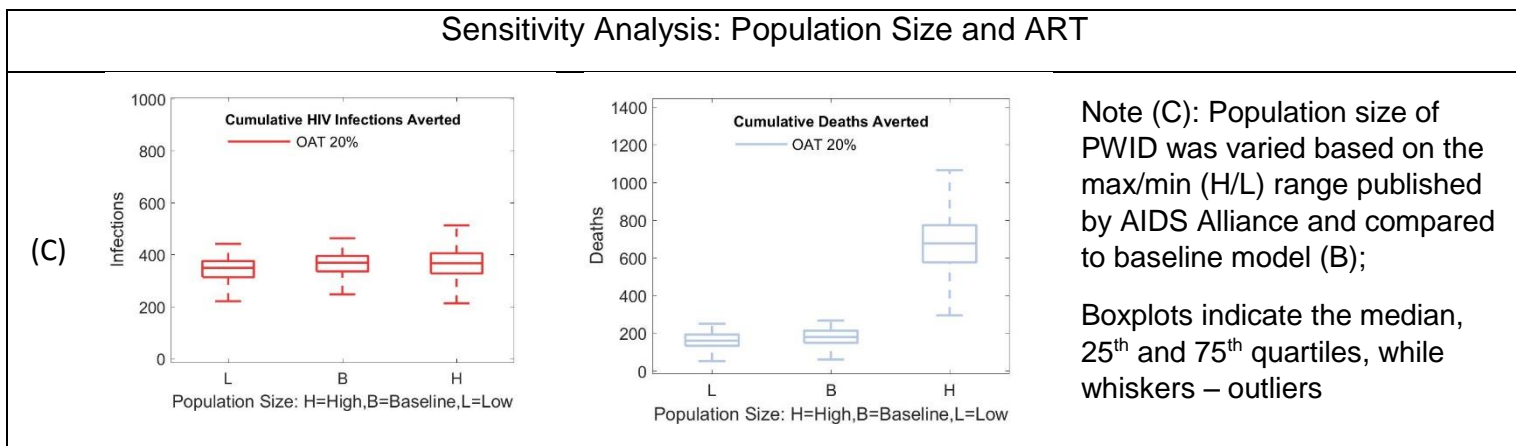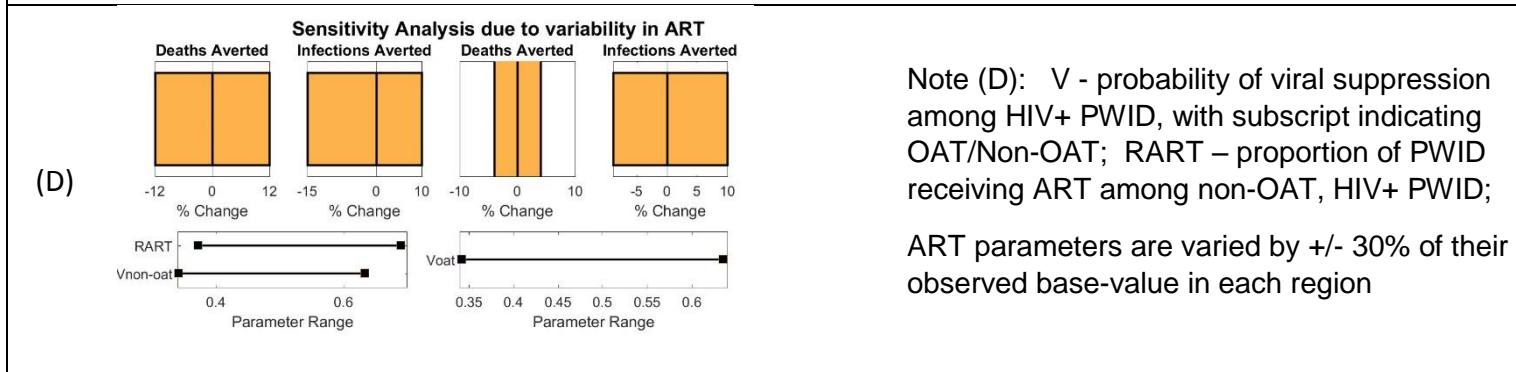



Figure S24. Region: **Zakarpattia**

Data and Model Projections Under Different OAT Scale-up Scenarios

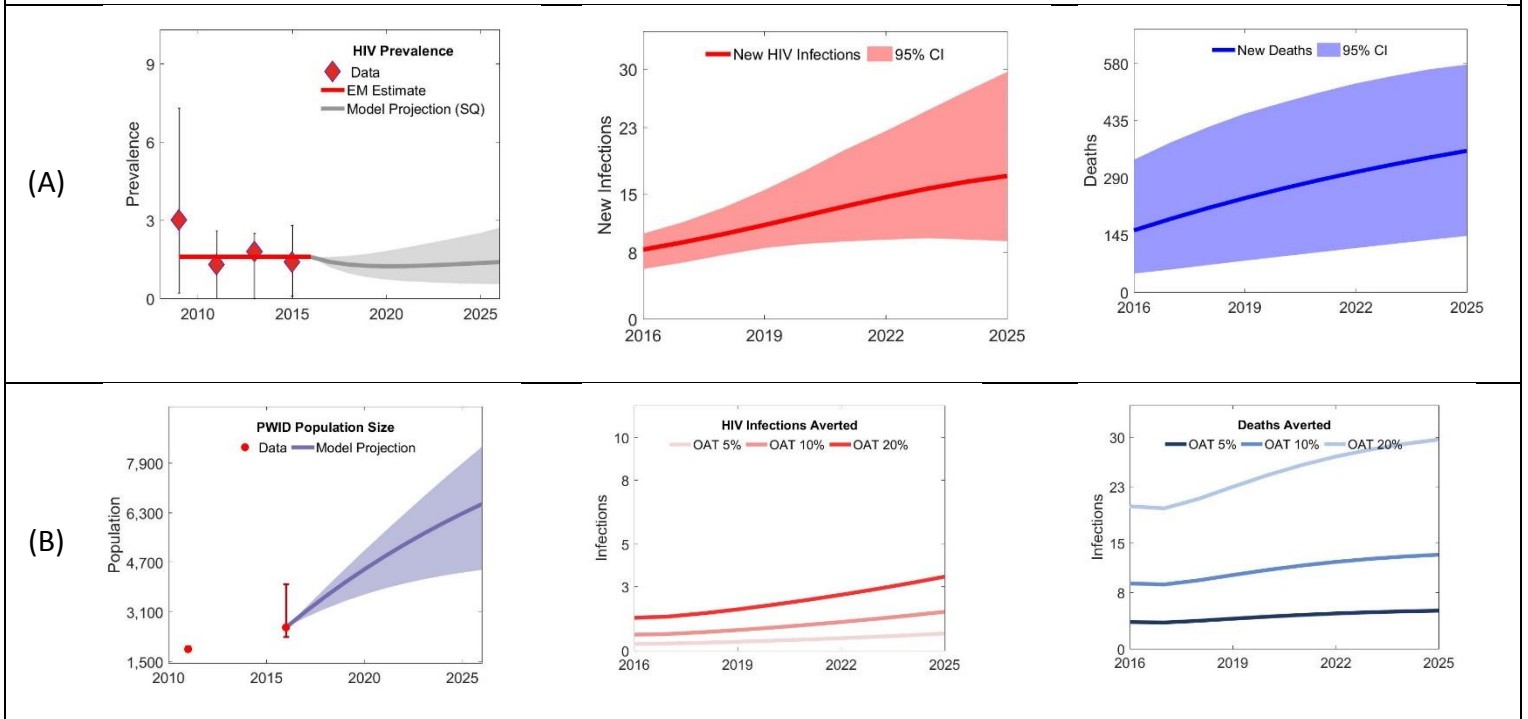

Footnote (A/B): In the projection of status quo, the line represents the mean; the shaded region - 95% confidence interval. EM stands for expectation maximization; (B) The circle represents point estimate for population size; error bar – max/min range.

Sensitivity Analysis: Population Size and ART

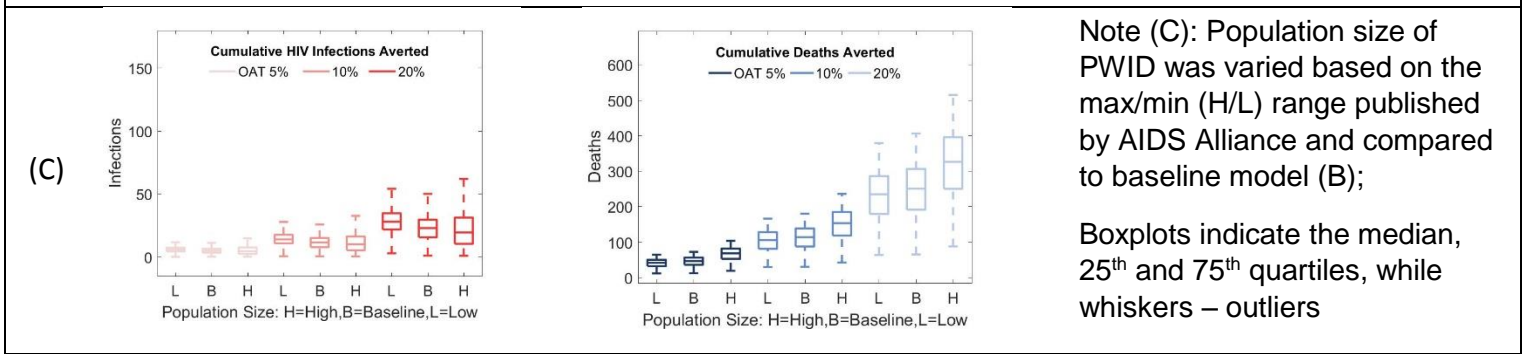

Note (C): Population size of PWID was varied based on the max/min (H/L) range published by AIDS Alliance and compared to baseline model (B);

Boxplots indicate the median, 25<sup>th</sup> and 75<sup>th</sup> quartiles, while whiskers – outliers

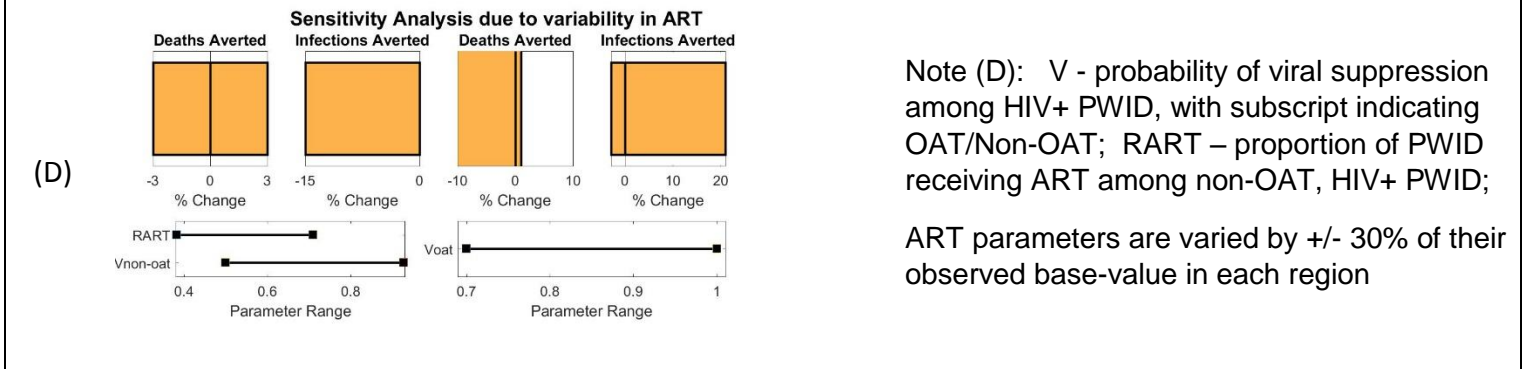

Note (D): V - probability of viral suppression among HIV+ PWID, with subscript indicating OAT/Non-OAT; RART – proportion of PWID receiving ART among non-OAT, HIV+ PWID;

ART parameters are varied by +/- 30% of their observed base-value in each region

Figure S27: All Regions Combined - Sensitivity Analysis with varying Population Size

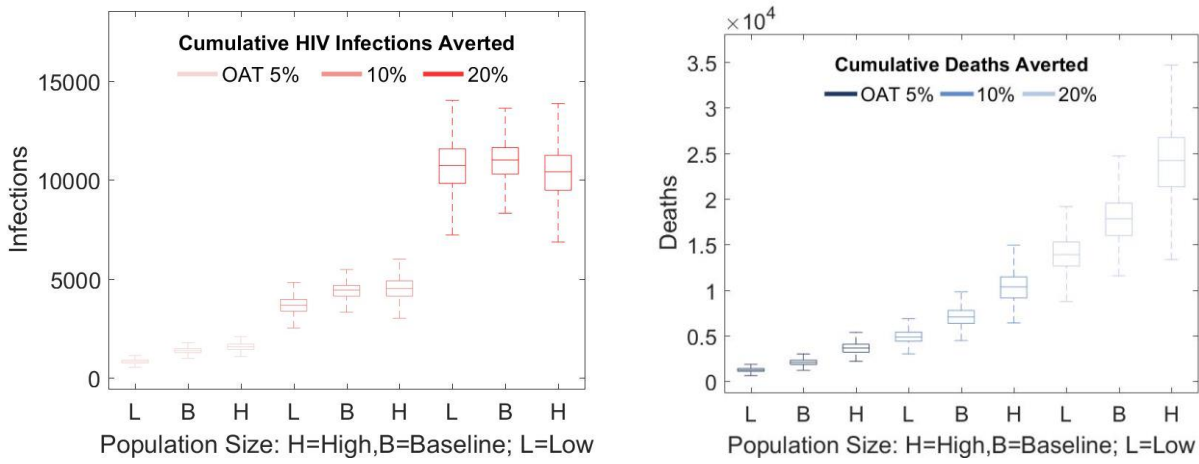

Figure S28: Sensitivity Analysis Based on Reducing Number of Population Compartments

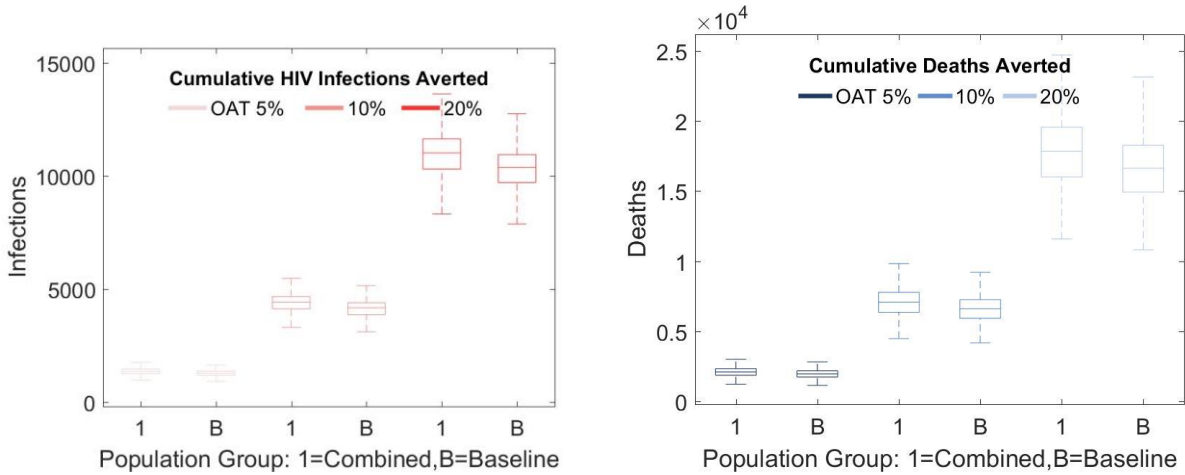

Note: We performed additional sensitivity analysis, in which the MSM and non-MSM groups were combined into a single compartment and the models were re-calibrated.

## References

1. Makarenko I, Mazhnaya A, Marcus R, et al. Willingness to pay for opioid agonist treatment among opioid dependent people who inject drugs in Ukraine. *Int J Drug Policy* 2017; **45**: 56-63.
2. Makarenko I, Mazhnaya A, Marcus R, et al. Concurrent drug injection during opioid agonist treatment among people who inject drugs in Ukraine. *J Subst Abuse Treat* 2018; **87**: 1-8.
3. Zelenev A, Li J, Mazhnaya A, Basu S, Altice FL. Hepatitis C virus treatment as prevention in an extended network of people who inject drugs in the USA: a modelling study. *Lancet Infect Dis* 2018; **18**(2): 215-24.
4. Zelenev A, Shea P, Mazhnaya A, et al. Assessment of barrier severity and willingness to enter opioid agonist treatment among people who inject drugs in Ukraine. *Drug and Alcohol Dependence* 2018; **190**: 82-8.
5. Zelenev A, Shea P, Mazhnaya A, et al. Estimating HIV and HCV prevalence among people who inject drugs in 5 Ukrainian cities using stratification-based respondent driven and random sampling. *Int J Drug Policy* 2019; **67**: 91-101.
6. Rubin D. Multiple Imputation for Non-Response in Surveys. New York ; : Wiley; 1987.
7. State Statistical Service of Ukraine. Population of Ukraine 2017. Demographic Yearbook Kiev, Ukraine 2017.
8. Ukrainian Center for Socially Dangerous Disease Control of the Ministry of Health of Ukraine & Gromashevsky Institute of Epidemiology and Infectious Diseases of the Academy of Medical Sciences of Ukraine. HIV Infection in Ukraine, Information Bulletin 45. Kiev, Ukraine, 2016.
9. Sordo L, Barrio, G., Bravo, M. J., Indave, B. I., Degenhardt, L., Wiessing, L., Ferri, M., Pastor-Barriuso, R Mortality risk during and after opioid substitution treatment: systematic review and meta-analysis of cohort studies. *BMJ* 2017; **357**(j1550): 1-17.
10. Kiev International Institute of Sociology. 44% of Ukrainians consider sex to be an important part of their lives . Kiev, Ukraine, 2013.<https://www.kiis.com.ua/?lang=eng&cat=reports&id=144&page=42>
11. Altice FL. Expanding Medication-Assisted Therapies in Ukraine: ExMAT Survey of 1,612 PWID in 5 Cities in Ukraine. Ukraine: National Institutes on Drug Abuse; 2015.
12. Public Health Center of Ukraine's Ministry of Health. Statistics on the Number of Patients on ART in Ukraine, Informational Bulletin. Kyiv, Ukraine, 2016.[https://phc.org.ua/pages/diseases/hiv\\_aids/statistics/art](https://phc.org.ua/pages/diseases/hiv_aids/statistics/art).
13. UNAIDS. Country factsheets- UKRAINE, 2017.<http://www.unaids.org/en/regionscountries/countries/ukraine>.
14. Balakirieva O, Bondar T, Loktieva I, Sazonova Y, Sereda Y. Summary of the analytical report: monitoring the behavior and HIV-infection prevalence among people who inject drugs as a component of the HIV second generation surveillance. Kiev: International HIV/AIDS Alliance in Ukraine: International HIV/AIDS Alliance in Ukraine, 2014.
15. Barska J, Sazanova Y. Monitoring of Behavior and HIV Prevalence in People Who Inject Drugs and Their Sexual Partners in Ukraine, 2015. Kiev, Ukraine: Alliance for Public Health, 2016.[http://aph.org.ua/wp-content/uploads/2015/09/Monitoring-povedinky-SIN\\_PROEKT.pdf](http://aph.org.ua/wp-content/uploads/2015/09/Monitoring-povedinky-SIN_PROEKT.pdf)
16. Balakireva O, Bondar, T, Lokteva, Sazanova, Y, Sereda, Y "Analytical Report: Monitoring the Behavior and HIV infection among People who inject drugs as a component of HIV second generation surveillance" (in Ukrainian). Kyiv, Ukraine: Alliance for Public Health in Ukraine, 2013.
17. McLachlan G, Krishnan T. The EM Algorithm and Extensions, 2nd Edition. New York, NY: Wiley; 1997.
